# Supplementary material
Source: publisher figshare collection journal article supplement (https://acs.figshare.com/ndownloader/files/16711361)
Supplement: Supplementary file 1 [file 16711361]

# Copper-Catalyzed Enantioselective Ring-Opening of Cyclic Diaryliodoniums and *O*-Alkylhydroxylamines

Qigang Li, Mingkai Zhang, Shuming Zhan and Zhenhua Gu\*

Department of Chemistry, Center for Excellence in Molecular Synthesis, and Hefei National Laboratory for Physical Sciences at the Microscale, University of Science and Technology of China, 96 Jinzhai Road, Hefei, Anhui 230026, P.R. China

[zhgu@ustc.edu.cn](mailto:zhgu@ustc.edu.cn)

## General Information

Nuclear magnetic resonances were recorded on Bruker-400 MHz instruments. Reference values for residual solvents were taken as  $\delta = 7.26$  ppm ( $\text{CDCl}_3$ ), 2.50 ppm ( $\text{DMSO-d}_6$ ) for  $^1\text{H}$  NMR;  $\delta = 77.00$  ppm ( $\text{CDCl}_3$ ), 39.52 ppm ( $\text{DMSO-d}_6$ ) for  $^{13}\text{C}$  NMR. High resolution mass spectral analysis (HRMS) was performed on Waters XEVO G2 Q-TOF (Waters Corporation). All reactions were performed under an inert atmosphere of dry nitrogen in flame-dried glassware, unless otherwise stated. Tetrahydrofuran were distilled over sodium in the presence of benzophenone under an atmosphere of nitrogen. Toluene and dichloroethane were distilled over calcium hydride under an atmosphere of nitrogen. The cyclic diaryliodoniums with triflate anion were synthesized according to the reported literature.<sup>1</sup>

## Synthesis of L10

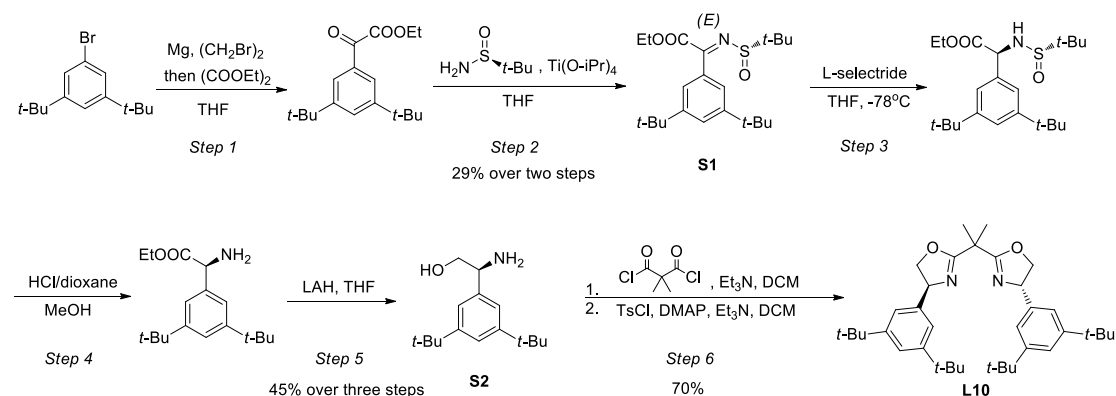

**Step 1:** Under nitrogen atmosphere, to a 200 mL Schleck flask containing magnesium (1.89 g, 78 mmol, 1.3 equiv) was added anhydrous THF (30 mL) followed by  $(\text{CH}_2\text{Br})_2$  (0.10 mL). To this mixture, a solution of 1-bromo-3,5-di-*tert*-butylbenzene (16.15 g, 60 mmol, 1.0 equiv) in THF (30 mL) was added dropwise under stirring at room temperature. Then the mixture was stirring at  $65^\circ\text{C}$  for 1 h. Diethyl

oxalate (16.3 mL, 120 mmol) was dissolved in THF (30 mL) in a 250 mL round-bottom flask under nitrogen. The solution was cooled to  $-78\text{ }^{\circ}\text{C}$ , then the above Grignard reagent was added to the reaction mixture in 10 min. After stirring for 1 h at  $-78\text{ }^{\circ}\text{C}$ , the reaction was warmed up to room temperature and stirred for another 20 min. After the reaction completed, saturated  $\text{NaHCO}_3$  solution (50 mL) was added. After stirring for 5 min, the mixture was filtered through a plug of Celite with ethyl acetate. The filtrate was extracted with ethyl acetate, washed with brine (50 mL x2), dried over anhydrous  $\text{Na}_2\text{SO}_4$  and concentrated, then  $(\text{CO}_2\text{Et})_2$  was removed by distillation at  $150\text{ }^{\circ}\text{C}$ , 0.01 Mpa to afford the crude product, which was used in next step without further purification.

*Step 2:* The crude product from Step 1 (11.32 g, about 39 mmol) and (*S*)-*tert*-butylsulfonamide (4.73 g, 39 mmol) were dissolved in anhydrous THF (60 mL), then  $\text{Ti}(\text{O}-i\text{Pr})_4$  (17.3 mL, 58.5 mmol, 1.5 equiv) was added. After stirring at  $65\text{ }^{\circ}\text{C}$  for 12 h under nitrogen, the solution was cooled to room temperature, diluted with ethyl acetate (50 mL), quenched by aqueous NaOH solution (10% w/w, 30 mL) and the mixture was stirring for another 10 min before being filtered through a plug of Celite with ethyl acetate. The filtrate was then washed with brine (80 mL x2), dried over anhydrous sodium sulfate, concentrated and purified by flash column chromatography (silica gel, 5% ethyl acetate in hexanes) to afford the pure (*S*)-*N*-*tert*-butanesulfinyl ketimine ester **S1** (6.9 g, 17.53 mmol, 29% over two steps).

*Step 3:* In accordance with the literature procedure,<sup>2</sup> the (*S*)-*N*-*tert*-butanesulfinyl ketimine ester **S1** (17.53 mmol, 1.0 equiv) was dissolved in THF (50 mL) in a 200 mL round-bottom flask under nitrogen. The solution was cooled to  $-78\text{ }^{\circ}\text{C}$  and stirred for 5 min, then L-Selectride in THF (19.3 mL, 1.0 M, 19.3 mmol, 1.1 equiv) was slowly added to the reaction mixture via a syringe at  $-78\text{ }^{\circ}\text{C}$  over 40 min. The reaction was stirred at  $-78\text{ }^{\circ}\text{C}$  for another 5 h, quenched with saturated  $\text{NH}_4\text{Cl}$  solution (30 mL) at  $-78\text{ }^{\circ}\text{C}$ , and warmed up to room temperature. The mixture was transferred to a separatory funnel containing brine (50 mL) and ethyl acetate (50 mL). The organic layer was separated and the aqueous layer was extracted with ethyl acetate (50 mL). The combined organic layers were washed with brine (50 mL x2), dried over sodium sulfate, and concentrated. The crude product was used in the next step without further purification.

*Step 4:* The crude product from Step 3 was dissolved in methanol (40 mL) in a 200 mL round-bottom flask in open air. A solution of hydrogen chloride in dioxane (17 mL, 4.0 M, 68 mmol) was then added to the reaction mixture at  $0\text{ }^{\circ}\text{C}$  over 2 min. The reaction flask was capped with a rubber septum and stirred at room temperature for 1 h. Then aqueous NaOH solution (10% w/w, 30 mL) was added slowly and the solution was extracted with ethyl acetate (80 mL), washed with brine (80 mL x2), dried over sodium sulfate, and concentrated to afford the crude product. The ee value (95% ee) was determined after acetylation of the amino group in accordance with the literature.<sup>3</sup>

*Step 5:* The crude product from Step 4 was dissolved in anhydrous THF (50 mL) in a 200 mL round-bottom flask under nitrogen and the solution was cooled to  $0\text{ }^{\circ}\text{C}$ . Lithium aluminum hydride (2

g, 52.7 mmol) was then added portionwise. The reaction was stirred at 0 °C overnight, and carefully quenched by sequential addition of 2 mL H<sub>2</sub>O – 2 mL 15 wt% NaOH solution – 2 mL H<sub>2</sub>O. The mixture was filtered through Celite with DCM, the filtrate was concentrated and purified by flash column chromatography on silica gel (DCM/ MeOH = 20/1) to afford the pure amino alcohol **S2** as white solid (1.98 g, 7.94 mmol, 29% over three steps).

**Step 6:** To an ice-cooled 100 mL round-bottom flask containing **S2** (7.94 mmol, 2.0 equiv), DCM (30 mL) and triethylamine (2.2 mL, 15.88 mmol, 4.0 equiv) was added dimethylmalonyl dichloride (0.525 mL, 3.97 mmol, 1.0 equiv) dropwise. After stirring at room temperature for 2 h, tosyl chloride (1.81 g, 9.53 mmol, 2.4 equiv), DMAP (137 mg, 0.794 mmol, 0.2 equiv) and triethylamine (2.76 mL, 19.85 mmol, 5.0 equiv) were then added. The reaction was stirred for 2 d at room temperature before removing the solvent by evaporator, and the residue was purified by flash column chromatography on silica gel (hexanes/ ethyl acetate = 10/1) to afford **L10** as a white solid (1.55 g, 2.77 mmol, 70%).  $[\alpha]_D^{20} = -48$  (c = 1.21, CHCl<sub>3</sub>). **<sup>1</sup>H NMR** (400 MHz, CDCl<sub>3</sub>) δ 7.32 (d, *J* = 1.6 Hz, 2H), 7.10 (d, *J* = 1.6 Hz, 4H), 5.17 (dd, *J* = 10.0, 6.8 Hz, 2H), 4.64 (dd, *J* = 10.0, 8.4 Hz, 2H), 4.25 (dd, *J* = 8.4, 6.8 Hz, 2H), 1.69 (s, 6H), 1.29 (s, 36H). **<sup>13</sup>C NMR** (101 MHz, CDCl<sub>3</sub>) δ 170.00, 150.98, 141.69, 121.64, 121.00, 75.89, 70.10, 38.75, 34.83, 31.41, 24.61. HRMS (ESI): calcd for C<sub>37</sub>H<sub>55</sub>N<sub>2</sub>O<sub>2</sub> (M+H)<sup>+</sup> 559.4264, found 559.4265.

### General Procedure for the Synthesis of **3** (Procedure A)

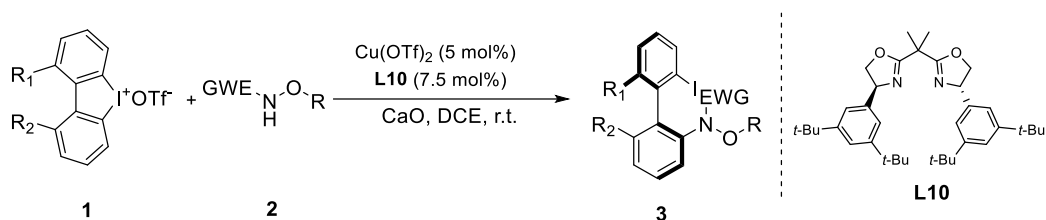

To a Schlenk tube containing **1** (1.0 equiv), **2** (1.2 equiv), Cu(OTf)<sub>2</sub> (5.0 mol%), **L10** (7.5 mol%) and CaO (2.0 equiv) was added DCE (0.05 M) under nitrogen at room temperature. After being stirred for 3-12 h (monitored by TLC) at room temperature, the solvent was removed and the residue was purified by flash column chromatography on silica gel (hexanes/ethyl acetate) to afford the desired product **3**.

Compound **3a** was prepared following the **Procedure A**

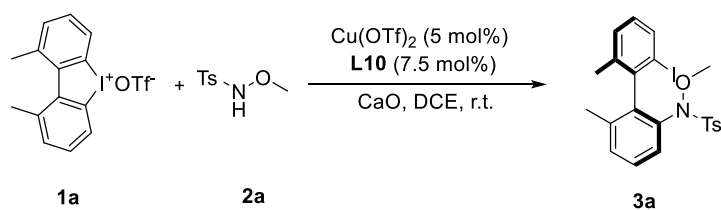

The reaction of **1a** (45.6 mg, 0.10 mmol, 1.0 equiv), **2a** (24.1 mg, 0.12 mmol, 1.2 equiv), Cu(OTf)<sub>2</sub> (1.8 mg, 5.0 mol%), **L10** (4.2 mg, 7.5 mol%) and CaO (11.2 mg, 0.20 mmol, 2.0 equiv) in DCE (2.0 mL) at

room temperature for 3 h afforded **3a** (50.2 mg, 99%, 99% ee).  $R_f = 0.5$  (PE/EA = 10:1).  $[\alpha]_D^{20} = +105$  ( $c = 0.93$ ,  $\text{CHCl}_3$ ). HPLC conditions: Chiralpak AD-H, isopropanol/hexane = 5:95, flow: 1.0 mL/min,  $\lambda = 254$  nm. **<sup>1</sup>H NMR** (400 MHz,  $\text{CDCl}_3$ )  $\delta$  7.77 (d,  $J = 8.0$  Hz, 1H), 7.60 (d,  $J = 8.4$  Hz, 2H), 7.30 (dd,  $J = 12.2, 7.8$  Hz, 4H), 7.15 (t,  $J = 7.8$  Hz, 1H), 7.00 (t,  $J = 7.8$  Hz, 1H), 6.63 (d,  $J = 8.4$  Hz, 1H), 3.76 (s, 3H), 2.46 (s, 3H), 2.25 (s, 3H), 2.02 (s, 3H). **<sup>13</sup>C NMR** (101 MHz,  $\text{CDCl}_3$ )  $\delta$  144.70, 143.16, 141.67, 139.84, 139.42, 137.69, 136.06, 132.10, 130.88, 130.09, 129.84, 129.16, 129.11, 127.95, 123.69, 101.12, 65.16, 21.78, 21.70, 20.16. HRMS (ESI): calcd for  $\text{C}_{22}\text{H}_{22}\text{INO}_3\text{SNa}$  ( $\text{M}+\text{Na}$ )<sup>+</sup> 530.0263, found 530.0269.

Compound **3b** was prepared following the **Procedure A**

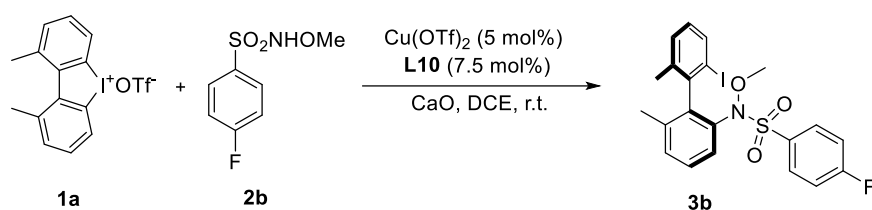

The reaction of **1a** (45.6 mg, 0.10 mmol, 1.0 equiv), **2b** (24.6 mg, 0.12 mmol, 1.2 equiv),  $\text{Cu}(\text{OTf})_2$  (1.8 mg, 5.0 mol%), **L10** (4.2 mg, 7.5 mol%) and  $\text{CaO}$  (11.2 mg, 0.20 mmol, 2.0 equiv) in DCE (2.0 mL) at room temperature for 3 h afforded **3b** (51.7 mg, >99%, 99% ee).  $R_f = 0.5$  (PE/EA = 10:1).  $[\alpha]_D^{20} = +73$  ( $c = 0.99$ ,  $\text{CHCl}_3$ ). HPLC conditions: Chiralpak AD-H, isopropanol/hexane = 5:95, flow: 1.0 mL/min,  $\lambda = 254$  nm. **<sup>1</sup>H NMR** (400 MHz,  $\text{CDCl}_3$ )  $\delta$  7.77 (d,  $J = 7.8$  Hz, 1H), 7.75 – 7.70 (m, 2H), 7.30 (t,  $J = 7.2$  Hz, 2H), 7.16 (q,  $J = 8.0, 7.5$  Hz, 3H), 7.00 (t,  $J = 7.8$  Hz, 1H), 6.56 (d,  $J = 8.2$  Hz, 1H), 3.81 (s, 3H), 2.23 (s, 3H), 2.02 (s, 3H). **<sup>19</sup>F NMR** (376 MHz,  $\text{CDCl}_3$ )  $\delta$  -103.30. **<sup>13</sup>C NMR** (101 MHz,  $\text{CDCl}_3$ )  $\delta$  167.12, 164.57, 143.07, 141.43, 139.73, 139.15, 137.91, 136.10, 132.84 (d,  $J = 9.5$  Hz), 131.03, 129.84, 129.22, 127.96, 123.39, 115.78 (d,  $J = 22.5$  Hz), 101.04, 65.30, 21.76, 20.17. HRMS (ESI): calcd for  $\text{C}_{21}\text{H}_{19}\text{FINO}_3\text{SNa}$  ( $\text{M}+\text{Na}$ )<sup>+</sup> 534.0012, found 534.0021.

Compound **3c** was prepared following the **Procedure A**

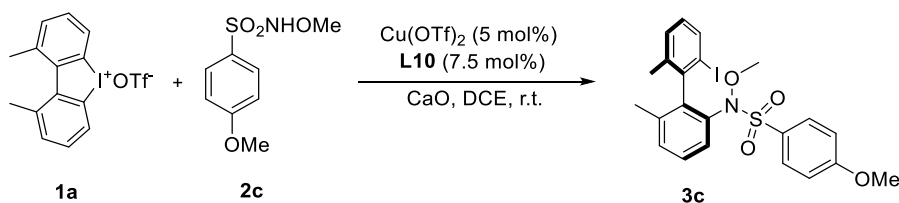

The reaction of **1a** (45.6 mg, 0.10 mmol, 1.0 equiv), **2c** (26.1 mg, 0.12 mmol, 1.2 equiv),  $\text{Cu}(\text{OTf})_2$  (1.8 mg, 5.0 mol%), **L10** (4.2 mg, 7.5 mol%) and  $\text{CaO}$  (11.2 mg, 0.20 mmol, 2.0 equiv) in DCE (2.0 mL) at room temperature for 3 h afforded **3c** (54.1 mg, >99%, 99% ee).  $R_f = 0.4$  (PE/EA = 10:1).  $[\alpha]_D^{20} = +106$  ( $c = 0.98$ ,  $\text{CHCl}_3$ ). HPLC conditions: Chiralpak AD-H, isopropanol/hexane = 5:95, flow: 1.0 mL/min,  $\lambda = 254$  nm. **<sup>1</sup>H NMR** (400 MHz,  $\text{CDCl}_3$ )  $\delta$  7.77 (d,  $J = 8.0$  Hz, 1H), 7.68 – 7.62 (m, 2H), 7.30 (dd,  $J = 11.8, 7.6$  Hz, 2H), 7.16 (t,  $J = 7.8$  Hz, 1H), 7.00 (t,  $J = 7.6$  Hz, 1H), 6.97 – 6.93 (m, 2H), 6.63 (d,  $J = 8.0$  Hz, 1H), 3.89 (s, 3H), 3.77 (s, 3H), 2.25 (s, 3H), 2.02 (s, 3H). **<sup>13</sup>C NMR** (101 MHz,  $\text{CDCl}_3$ )  $\delta$  163.77, 143.09, 141.67, 139.79, 139.57, 137.63, 136.03, 132.22, 130.81, 129.80, 129.12, 127.90, 126.39, 123.61, 113.64, 101.12, 65.16, 55.62, 21.76, 20.14. HRMS (ESI): calcd for  $\text{C}_{22}\text{H}_{22}\text{INO}_4\text{SNa}$  ( $\text{M}+\text{Na}$ )<sup>+</sup> 546.0212, found 546.0212.



Compound **3d** was prepared following the **Procedure A**

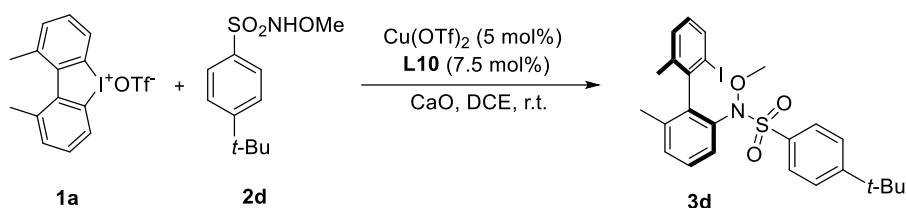

The reaction of **1a** (45.6 mg, 0.10 mmol, 1.0 equiv), **2d** (29.2 mg, 0.12 mmol, 1.2 equiv), Cu(OTf)<sub>2</sub> (1.8 mg, 5.0 mol%), **L10** (4.2 mg, 7.5 mol%) and CaO (11.2 mg, 0.20 mmol, 2.0 equiv) in DCE (2.0 mL) at room temperature for 3 h afforded **3d** (54.7 mg, 99%, 99% ee). R<sub>f</sub> = 0.5 (PE/EA = 10:1).  $[\alpha]_D^{20} = +82$  (c = 0.78, CHCl<sub>3</sub>). HPLC conditions: Chiralpak AD-H, isopropanol/hexane = 5:95, flow: 1.0 mL/min,  $\lambda = 254$  nm. <sup>1</sup>H NMR (400 MHz, CDCl<sub>3</sub>)  $\delta$  7.77 (d, *J* = 8.0 Hz, 1H), 7.67 – 7.63 (m, 2H), 7.52 – 7.47 (m, 2H), 7.30 (dd, *J* = 12.4, 7.6 Hz, 2H), 7.14 (t, *J* = 7.8 Hz, 1H), 7.00 (t, *J* = 7.8 Hz, 1H), 6.63 (d, *J* = 8.0 Hz, 1H), 3.75 (s, 3H), 2.25 (s, 3H), 2.02 (s, 3H), 1.36 (s, 9H). <sup>13</sup>C NMR (101 MHz, CDCl<sub>3</sub>)  $\delta$  157.71, 143.22, 141.69, 139.80, 139.38, 137.71, 136.07, 132.07, 130.91, 129.92, 129.85, 129.18, 127.93, 125.45, 123.73, 101.16, 65.14, 35.26, 31.07, 21.78, 20.16. HRMS (ESI): calcd for C<sub>25</sub>H<sub>28</sub>INO<sub>3</sub>SNa (M+Na)<sup>+</sup> 572.0732, found 572.0736.

Compound **3e** was prepared following the **Procedure A**

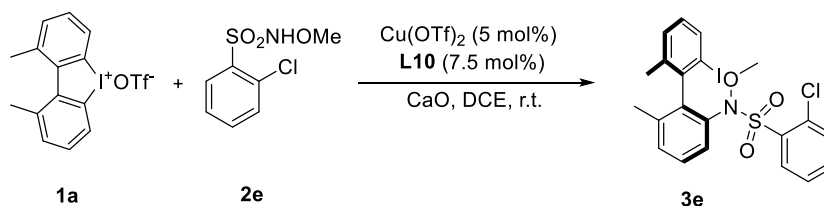

The reaction of **1a** (45.6 mg, 0.10 mmol, 1.0 equiv), **2e** (26.6 mg, 0.12 mmol, 1.2 equiv), Cu(OTf)<sub>2</sub> (1.8 mg, 5.0 mol%), **L10** (4.2 mg, 7.5 mol%) and CaO (11.2 mg, 0.20 mmol, 2.0 equiv) in DCE (2.0 mL) at room temperature for 12 h afforded **3e** (45.7 mg, 86%, 88% ee). R<sub>f</sub> = 0.4 (PE/EA = 10:1).  $[\alpha]_D^{20} = +37.6$  (c = 0.85, CHCl<sub>3</sub>). HPLC conditions: Chiralpak AD-H, isopropanol/hexane = 5:95, flow: 1.0 mL/min,  $\lambda = 254$  nm. <sup>1</sup>H NMR (400 MHz, CDCl<sub>3</sub>)  $\delta$  8.03 (dd, *J* = 8.0, 1.6 Hz, 1H), 7.76 (d, *J* = 7.6 Hz, 1H), 7.53 (ddd, *J* = 8.0, 7.2, 1.6 Hz, 1H), 7.47 (dd, *J* = 8.0, 1.4 Hz, 1H), 7.41 – 7.33 (m, 2H), 7.32 – 7.27 (m, 2H), 7.26 – 7.22 (m, 1H), 6.99 (t, *J* = 7.8 Hz, 1H), 3.55 (s, 3H), 2.23 (s, 3H), 2.01 (s, 3H). <sup>13</sup>C NMR (101 MHz, CDCl<sub>3</sub>)  $\delta$  143.12, 141.74, 140.35, 138.31, 137.80, 136.07, 134.76, 134.65, 134.25, 133.63, 132.09, 131.32, 129.99, 129.16, 128.28, 126.62, 125.02, 101.12, 64.52, 21.86, 20.21. HRMS (ESI): calcd for C<sub>21</sub>H<sub>19</sub>ClINO<sub>3</sub>SNa (M+Na)<sup>+</sup> 549.9717, found 549.9711.

Compound **3f** was prepared following the **Procedure A**

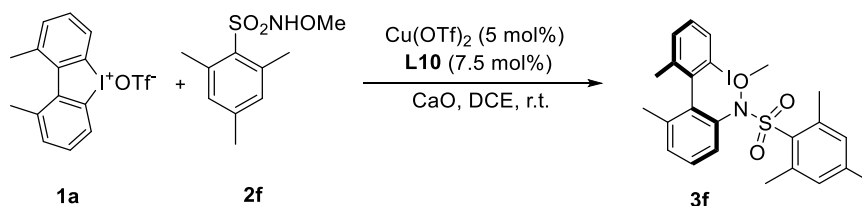

The reaction of **1a** (45.6 mg, 0.10 mmol, 1.0 equiv), **2f** (27.5 mg, 0.12 mmol, 1.2 equiv), Cu(OTf)<sub>2</sub> (1.8 mg, 5.0 mol%), **L10** (4.2 mg, 7.5 mol%) and CaO (11.2 mg, 0.20 mmol, 2.0 equiv) in DCE (2.0 mL) at room temperature for 3 h afforded **3f** (50.1 mg, 94%, 96% ee). R<sub>f</sub> = 0.5 (PE/EA = 10:1).  $[\alpha]_D^{20} = +22.7$  (c = 0.74, CHCl<sub>3</sub>). HPLC conditions: Chiralpak AD-H, isopropanol/hexane = 5:95, flow: 1.0 mL/min, λ = 254 nm. <sup>1</sup>H NMR (400 MHz, CDCl<sub>3</sub>) δ 7.76 – 7.68 (m, 2H), 7.42 – 7.33 (m, 2H), 7.26 (d, J = 8.0 Hz, 1H), 6.96 (t, J = 7.6 Hz, 1H), 6.89 (s, 2H), 3.23 (s, 3H), 2.31 (s, 6H), 2.28 (s, 3H), 2.22 (s, 3H), 2.00 (s, 3H). <sup>13</sup>C NMR (101 MHz, CDCl<sub>3</sub>) δ 143.50, 142.73, 142.51, 142.15, 140.56, 138.69, 137.23, 136.06, 131.69, 131.04, 130.97, 130.17, 129.06, 128.32, 126.10, 101.02, 63.80, 22.55, 21.91, 21.03, 20.21. HRMS (ESI): calcd for C<sub>24</sub>H<sub>26</sub>INO<sub>3</sub>SNa (M+Na)<sup>+</sup> 558.0576, found 558.0583.

Compound **3g** was prepared following the **Procedure A**

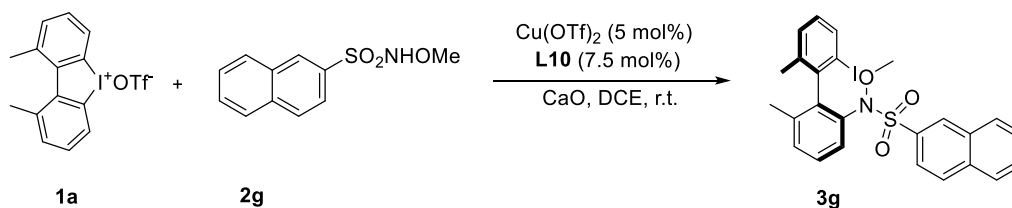

The reaction of **1a** (45.6 mg, 0.10 mmol, 1.0 equiv), **2g** (28.5 mg, 0.12 mmol, 1.2 equiv), Cu(OTf)<sub>2</sub> (1.8 mg, 5.0 mol%), **L10** (4.2 mg, 7.5 mol%) and CaO (11.2 mg, 0.20 mmol, 2.0 equiv) in DCE (2.0 mL) at room temperature for 3 h afforded **3g** (mg, 93%, 94% ee). R<sub>f</sub> = 0.5 (PE/EA = 10:1).  $[\alpha]_D^{20} = +83.6$  (c = 1.07, CHCl<sub>3</sub>). HPLC conditions: Chiralpak AD-H, isopropanol/hexane = 5:95, flow: 1.0 mL/min, λ = 254 nm. <sup>1</sup>H NMR (400 MHz, CDCl<sub>3</sub>) δ 8.32 (s, 1H), 7.97 – 7.88 (m, 3H), 7.79 (d, J = 7.2 Hz, 1H), 7.71 – 7.59 (m, 3H), 7.35 (d, J = 7.6 Hz, 1H), 7.29 (d, J = 7.6 Hz, 1H), 7.10 (t, J = 7.8 Hz, 1H), 7.03 (t, J = 7.8 Hz, 1H), 6.68 (d, J = 8.0 Hz, 1H), 3.75 (s, 3H), 2.30 (s, 3H), 2.04 (s, 3H). <sup>13</sup>C NMR (101 MHz, CDCl<sub>3</sub>) δ 143.19, 141.68, 139.85, 139.13, 137.77, 136.10, 135.28, 132.39, 131.75, 131.01, 129.86, 129.44, 129.20, 128.43, 128.03, 127.87, 127.40, 124.79, 123.90, 101.16, 65.15, 21.82, 20.15. HRMS (ESI): calcd for C<sub>25</sub>H<sub>22</sub>INO<sub>3</sub>SNa (M+Na)<sup>+</sup> 566.0263, found 566.0270.

Compound **3h** was prepared following the **Procedure A**

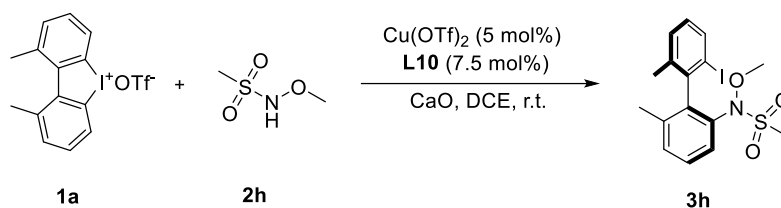

The reaction of **1a** (45.6 mg, 0.10 mmol, 1.0 equiv), **2h** (15.0 mg, 0.12 mmol, 1.2 equiv), Cu(OTf)<sub>2</sub> (1.8 mg, 5.0 mol%), **L10** (4.2 mg, 7.5 mol%) and CaO (11.2 mg, 0.20 mmol, 2.0 equiv) in DCE (2.0 mL) at room temperature for 3 h afforded **3h** (37.9 mg, 88%, 96% ee). R<sub>f</sub> = 0.5 (PE/EA = 10:1).  $[\alpha]_D^{20} = +49.5$  (c = 1.10, CHCl<sub>3</sub>). HPLC conditions: Chiralpak AD-H, isopropanol/hexane = 5:95, flow: 1.0 mL/min, λ = 254 nm. <sup>1</sup>H NMR (400 MHz, CDCl<sub>3</sub>) δ 7.75 (d, J = 8.0 Hz, 1H), 7.41 (dd, J = 7.2, 5.6 Hz, 2H), 7.37 – 7.34 (m, 1H), 7.27 – 7.24 (m, 1H), 6.97 (t, J = 7.8 Hz, 1H), 3.85 (s, 3H), 3.00 (s, 3H), 2.12 (s, 3H), 2.01 (s, 3H). <sup>13</sup>C NMR (101 MHz, CDCl<sub>3</sub>) δ 143.33, 141.47, 139.57, 138.51, 138.36, 136.12, 131.17, 129.84, 129.25, 128.41, 123.45, 100.97, 64.97, 34.68, 21.62, 20.14. HRMS (ESI): calcd for C<sub>16</sub>H<sub>18</sub>INO<sub>3</sub>SNa (M+Na)<sup>+</sup> 453.9950, found 453.9955.

Compound **3i** was prepared following the **Procedure A**

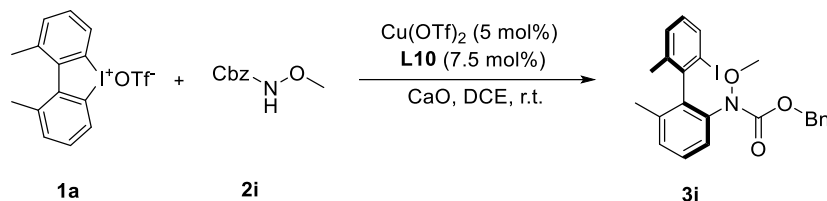

The reaction of **1a** (45.6 mg, 0.10 mmol, 1.0 equiv), **2i** (21.7 mg, 0.12 mmol, 1.2 equiv), Cu(OTf)<sub>2</sub> (1.8 mg, 5.0 mol%), **L10** (4.2 mg, 7.5 mol%) and CaO (11.2 mg, 0.20 mmol, 2.0 equiv) in DCE (2.0 mL) at room temperature for 6 h afforded **3i** (42.1 mg, 86%, 93% ee). R<sub>f</sub> = 0.5 (PE/EA = 10:1).  $[\alpha]_D^{20} = +0.7$  (c = 0.89, CHCl<sub>3</sub>). HPLC conditions: Chiralpak AD-H, isopropanol/hexane = 10:90, flow: 1.0 mL/min,  $\lambda$  = 254 nm. <sup>1</sup>H NMR (400 MHz, CDCl<sub>3</sub>)  $\delta$  7.74 (d, *J* = 7.5 Hz, 1H), 7.35 – 7.26 (m, 7H), 7.19 (d, *J* = 7.2 Hz, 1H), 7.15 (t, *J* = 4.6 Hz, 1H), 6.93 (t, *J* = 7.6 Hz, 1H), 5.19 (d, *J* = 12.4 Hz, 1H), 5.16 (d, *J* = 12.4 Hz, 1H), 3.48 (s, 3H), 2.00 (s, 3H), 1.94 (s, 3H). <sup>13</sup>C NMR (101 MHz, CDCl<sub>3</sub>)  $\delta$  155.20, 142.22, 141.98, 138.25, 137.92, 136.81, 136.39, 135.99, 130.69, 129.68, 129.10, 128.37, 128.02, 127.97, 127.91, 126.67, 101.59, 67.52, 61.85, 21.15, 19.79. HRMS (ESI): calcd for C<sub>23</sub>H<sub>22</sub>INO<sub>3</sub>Na (M+Na)<sup>+</sup> 510.0542, found 510.0535.

Compound **3j** was prepared following the **Procedure A**

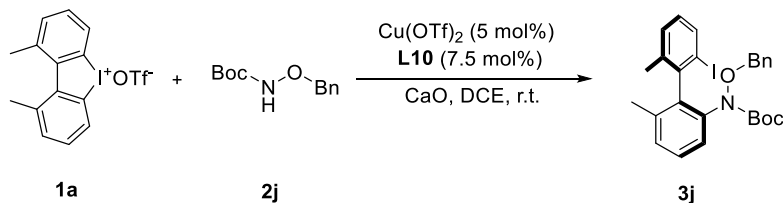

The reaction of **1a** (45.6 mg, 0.10 mmol, 1.0 equiv), **2j** (26.8 mg, 0.12 mmol, 1.2 equiv), Cu(OTf)<sub>2</sub> (1.8 mg, 5.0 mol%), **L10** (4.2 mg, 7.5 mol%) and CaO (11.2 mg, 0.20 mmol, 2.0 equiv) in DCE (2.0 mL) at room temperature for 12 h afforded **3j** (44.1 mg, 83%, 95% ee). R<sub>f</sub> = 0.6 (PE/EA = 20:1).  $[\alpha]_D^{20} = +9.5$  (c = 1.01, CHCl<sub>3</sub>). HPLC conditions: Chiralpak OD-H, isopropanol/hexane = 0.5:99.5, flow: 1.0 mL/min,  $\lambda$  = 254 nm. <sup>1</sup>H NMR (400 MHz, CDCl<sub>3</sub>)  $\delta$  7.77 (d, *J* = 8.0 Hz, 1H), 7.39 – 7.26 (m, 7H), 7.23 (d, *J* = 7.6 Hz, 1H), 7.16 (d, *J* = 7.2 Hz, 1H), 6.95 (t, *J* = 8.0 Hz, 1H), 4.54 (d, *J* = 9.4 Hz, 1H), 4.50 (d, *J* = 9.4 Hz, 1H), 2.04 (s, 3H), 2.01 (s, 3H), 1.43 (s, 9H). <sup>13</sup>C NMR (101 MHz, CDCl<sub>3</sub>)  $\delta$  155.18, 142.41, 142.34, 138.66, 138.51, 137.59, 136.40, 135.48, 130.24, 129.68, 129.50, 129.06, 128.10, 128.05, 127.97, 126.84, 101.80, 81.63, 75.96, 28.22, 21.34, 19.91. HRMS (ESI): calcd for C<sub>26</sub>H<sub>28</sub>INO<sub>3</sub>Na (M+Na)<sup>+</sup> 552.1012, found 552.1016.

**A reaction at 1 mmol scale:** To a Schlenk tube containing **1a** (0.456 g, 1.0 mmol, 1.0 equiv), **2j** (0.268 g, 1.2 mmol, 1.2 equiv), Cu(OTf)<sub>2</sub> (18 mg, 5.0 mol%), **L10** (42 mg, 7.5 mol%) and CaO (0.112 g, 2.0 mmol, 2.0 equiv) was added DCE (10.0 mL, 0.10 M of **1a**) under nitrogen at room temperature and stirred at the same temperature. After complete consumption of starting material (12 h at room temperature), the solvent was removed by evaporation and the residue was purified by flash column chromatography on silica gel (hexanes/ethyl acetate = 40:1) to afford the desired product **3j** (0.481 g, 91%, 95% ee).

Compound **3k** was prepared following the **Procedure A**

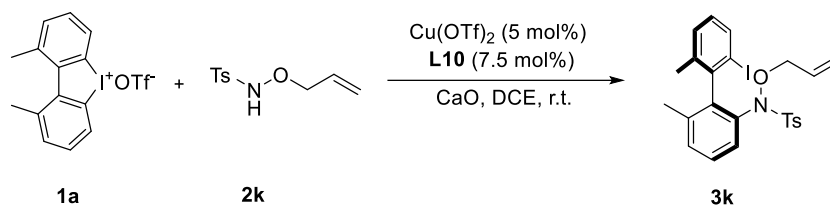

The reaction of **1a** (91.2 mg, 0.20 mmol, 1.0 equiv), **2k** (54.5 mg, 0.24 mmol, 1.2 equiv), Cu(OTf)<sub>2</sub> (3.6 mg, 5.0 mol%), **L10** (8.4 mg, 7.5 mol%) and CaO (22.4 mg, 0.40 mmol, 2.0 equiv) in DCE (4.0 mL) at room temperature for 6 h afforded **3k** (100.5 mg, 94%, 75% ee). R<sub>f</sub> = 0.4 (PE/EA = 10:1).  $[\alpha]_D^{20} = +23.3$  (c = 0.92, CHCl<sub>3</sub>). HPLC conditions: Chiralpak AD-H, isopropanol/hexane = 5:95, flow: 1.0 mL/min,  $\lambda$  = 254 nm. <sup>1</sup>H NMR (400 MHz, CDCl<sub>3</sub>)  $\delta$  7.80 – 7.73 (m, 1H), 7.59 (d, *J* = 8.4 Hz, 2H), 7.34 – 7.26 (m, 4H), 7.13 (t, *J* = 8.0 Hz, 1H), 7.00 (t, *J* = 7.6 Hz, 1H), 6.60 (d, *J* = 7.6 Hz, 1H), 5.84 (ddt, *J* = 16.8, 10.4, 6.2 Hz, 1H), 5.29 – 5.13 (m, 2H), 4.70 (ddt, *J* = 11.0, 6.0, 1.2 Hz, 1H), 4.39 (ddt, *J* = 10.9, 6.4, 1.2 Hz, 1H), 2.46 (s, 3H), 2.26 (s, 3H), 2.01 (s, 3H). <sup>13</sup>C NMR (101 MHz, CDCl<sub>3</sub>)  $\delta$  144.71, 143.06, 141.59, 139.93, 139.60, 137.60, 136.04, 132.24, 131.68, 130.82, 130.27, 129.87, 129.17, 129.06, 127.91, 123.79, 119.35, 101.06, 78.44, 21.81, 21.71, 20.17. HRMS (ESI): calcd for C<sub>24</sub>H<sub>24</sub>INO<sub>3</sub>SNa (M+Na)<sup>+</sup> 556.0419, found 556.0419.

Compound **3l** was prepared following the **Procedure A**

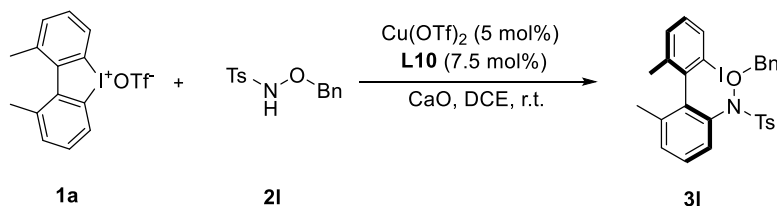

The reaction of **1a** (45.6 mg, 0.10 mmol, 1.0 equiv), **2l** (33.3 mg, 0.12 mmol, 1.2 equiv), Cu(OTf)<sub>2</sub> (1.8 mg, 5.0 mol%), **L10** (4.2 mg, 7.5 mol%) and CaO (11.2 mg, 0.20 mmol, 2.0 equiv) in DCE (2.0 mL) at room temperature for 6 h afforded **3l** (61.8 mg, >99%, 98% ee). R<sub>f</sub> = 0.5 (PE/EA = 10:1).  $[\alpha]_D^{20} = -3.3$  (c = 1.06, CHCl<sub>3</sub>). HPLC conditions: Chiralpak AD-H, isopropanol/hexane = 5:95, flow: 1.0 mL/min,  $\lambda$  = 254 nm. <sup>1</sup>H NMR (400 MHz, CDCl<sub>3</sub>)  $\delta$  7.80 (d, *J* = 7.6 Hz, 1H), 7.58 (d, *J* = 8.4 Hz, 2H), 7.38 – 7.28 (m, 7H), 7.24 (d, *J* = 8.0 Hz, 2H), 7.12 (t, *J* = 7.8 Hz, 1H), 7.03 (t, *J* = 7.8 Hz, 1H), 6.58 (d, *J* = 8.0 Hz, 1H), 5.34 (d, *J* = 9.2 Hz, 1H), 4.95 (d, *J* = 9.6 Hz, 1H), 2.43 (s, 3H), 2.31 (s, 3H), 2.05 (s, 3H). <sup>13</sup>C NMR (101 MHz, CDCl<sub>3</sub>)  $\delta$  144.63, 142.94, 141.59, 140.10, 139.72, 137.59, 136.10, 135.46, 131.44, 130.76, 130.31, 129.90, 129.19, 129.16, 129.02, 128.25, 127.84, 123.92, 101.12, 79.19, 21.88, 21.65, 20.20. HRMS (ESI): calcd for C<sub>28</sub>H<sub>26</sub>INO<sub>3</sub>SNa (M+Na)<sup>+</sup> 606.0576, found 606.0579.

Compound **3m** was prepared following the **Procedure A**

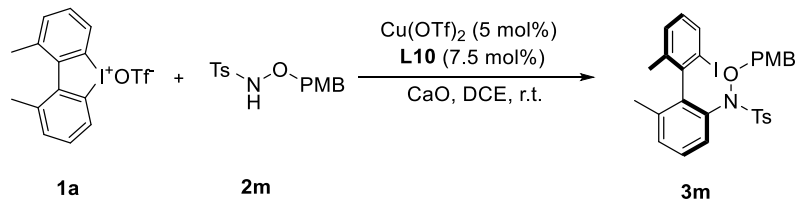

The reaction of **1a** (91.2 mg, 0.20 mmol, 1.0 equiv), **2m** (73.8 mg, 0.24 mmol, 1.2 equiv), Cu(OTf)<sub>2</sub> (3.6 mg, 5.0 mol%), **L10** (8.4 mg, 7.5 mol%) and CaO (22.4 mg, 0.40 mmol, 2.0 equiv) in DCE (4.0 mL) at room temperature for 12 h afforded **3m** (107 mg, 87%, 93% ee). R<sub>f</sub> = 0.4 (PE/EA =

10:1).  $[\alpha]_D^{20} = -31.4$  ( $c = 0.51$ ,  $\text{CHCl}_3$ ). HPLC conditions: Chiralpak AD-H, isopropanol/hexane = 5:95, flow: 1.0 mL/min,  $\lambda = 254$  nm.  **$^1\text{H}$  NMR** (400 MHz,  $\text{CDCl}_3$ )  $\delta$  7.79 (d,  $J = 7.6$  Hz, 1H), 7.60 – 7.53 (m, 2H), 7.34 (d,  $J = 7.6$  Hz, 1H), 7.28 (d,  $J = 6.4$  Hz, 3H), 7.23 (d,  $J = 8.0$  Hz, 2H), 7.10 (t,  $J = 7.8$  Hz, 1H), 7.02 (t,  $J = 7.8$  Hz, 1H), 6.87 – 6.81 (m, 2H), 6.53 (d,  $J = 8.0$  Hz, 1H), 5.25 (d,  $J = 9.2$  Hz, 1H), 4.86 (d,  $J = 9.2$  Hz, 1H), 3.80 (s, 3H), 2.42 (s, 3H), 2.29 (s, 3H), 2.03 (s, 3H).  **$^{13}\text{C}$  NMR** (101 MHz,  $\text{CDCl}_3$ )  $\delta$  159.70, 144.57, 143.00, 141.65, 140.12, 139.81, 137.61, 136.13, 131.58, 131.00, 130.73, 130.35, 129.93, 129.20, 129.03, 127.84, 127.67, 124.01, 113.67, 101.20, 78.87, 55.23, 21.91, 21.67, 20.22. HRMS (ESI): calcd for  $\text{C}_{29}\text{H}_{28}\text{INO}_4\text{SNa}$  ( $\text{M}+\text{Na}$ ) $^+$  636.0681, found 636.0682.

Compound **3n** was prepared following the **Procedure A**

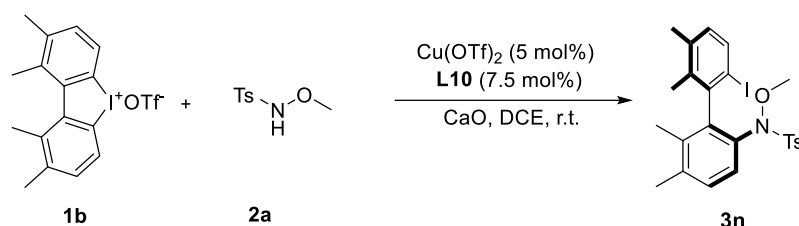

The reaction of **1b** (48.4 mg, 0.10 mmol, 1.0 equiv), **2a** (24.1 mg, 0.12 mmol, 1.2 equiv),  $\text{Cu(OTf)}_2$  (1.8 mg, 5.0 mol%), **L10** (4.2 mg, 7.5 mol%) and  $\text{CaO}$  (11.2 mg, 0.20 mmol, 2.0 equiv) in DCE (2.0 mL) at room temperature for 6 h afforded **3n** (57 mg, >99%, 97% ee).  $\text{Rf} = 0.5$  (PE/EA = 10:1).  $[\alpha]_D^{20} = +68.9$  ( $c = 1.05$ ,  $\text{CHCl}_3$ ). HPLC conditions: Chiralpak AD-H, isopropanol/hexane = 5:95, flow: 1.0 mL/min,  $\lambda = 254$  nm.  **$^1\text{H}$  NMR** (400 MHz,  $\text{CDCl}_3$ )  $\delta$  7.66 (d,  $J = 8.0$  Hz, 1H), 7.59 (d,  $J = 8.4$  Hz, 2H), 7.28 (d,  $J = 8.0$  Hz, 2H), 7.04 (d,  $J = 8.4$  Hz, 1H), 6.91 (d,  $J = 8.0$  Hz, 1H), 6.52 (d,  $J = 8.0$  Hz, 1H), 3.73 (s, 3H), 2.46 (s, 3H), 2.32 (d,  $J = 2.4$  Hz, 6H), 2.13 (s, 3H), 1.90 (s, 3H).  **$^{13}\text{C}$  NMR** (101 MHz,  $\text{CDCl}_3$ )  $\delta$  144.51, 143.90, 141.98, 138.68, 138.28, 137.18, 136.90, 136.00, 135.39, 132.38, 130.57, 130.03, 129.35, 129.03, 123.30, 97.96, 65.02, 21.67, 20.60, 20.27, 19.29, 16.56. HRMS (ESI): calcd for  $\text{C}_{24}\text{H}_{26}\text{INO}_3\text{SNa}$  ( $\text{M}+\text{Na}$ ) $^+$  558.0576, found 558.0573.

Compound **3o** was prepared following the **Procedure A**

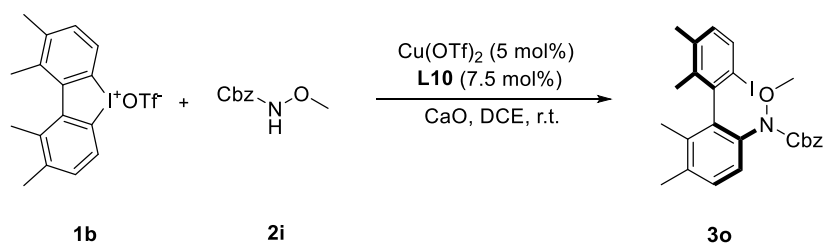

The reaction of **1b** (49.2 mg, 0.10 mmol, 1.0 equiv), **2i** (24.1 mg, 0.12 mmol, 1.2 equiv),  $\text{Cu(OTf)}_2$  (1.8 mg, 5.0 mol%), **L10** (4.2 mg, 7.5 mol%) and  $\text{CaO}$  (11.2 mg, 0.20 mmol, 2.0 equiv) in DCE (2.0 mL) at room temperature for 6 h afforded **3o** (48.9 mg, 95%, 95% ee).  $\text{Rf} = 0.5$  (PE/EA = 10:1).  $[\alpha]_D^{20} = +14.6$  ( $c = 0.98$ ,  $\text{CHCl}_3$ ). HPLC conditions: Chiralpak AD-H, isopropanol/hexane = 5:95, flow: 1.0 mL/min,  $\lambda = 254$  nm.  **$^1\text{H}$  NMR** (400 MHz,  $\text{CDCl}_3$ )  $\delta$  7.63 (d,  $J = 8.0$  Hz, 1H), 7.35 – 7.26 (m, 5H), 7.21 (d,  $J = 8.0$  Hz, 1H), 7.05 (d,  $J = 8.0$  Hz, 1H), 6.84 (d,  $J = 8.0$  Hz, 1H), 5.18 (d,  $J = 12.4$  Hz, 1H), 5.14 (d,  $J = 12.4$  Hz, 1H), 3.45 (s, 3H), 2.35 (s, 3H), 2.19 (s, 3H), 1.87 (s, 3H), 1.82 (s, 3H).  **$^{13}\text{C}$  NMR** (101 MHz,  $\text{CDCl}_3$ )  $\delta$  155.23, 142.95, 142.04, 138.00, 137.00, 136.63, 136.32, 136.13, 135.69, 134.61, 130.57, 129.24, 128.32, 127.93, 126.23, 98.51, 67.35, 61.51, 20.60, 20.21, 18.03, 16.27. HRMS (ESI): calcd for  $\text{C}_{25}\text{H}_{26}\text{INO}_3\text{Na}$  ( $\text{M}+\text{Na}$ ) $^+$  538.0855, found 538.0848.

Compound **3p** was prepared following the **Procedure A**

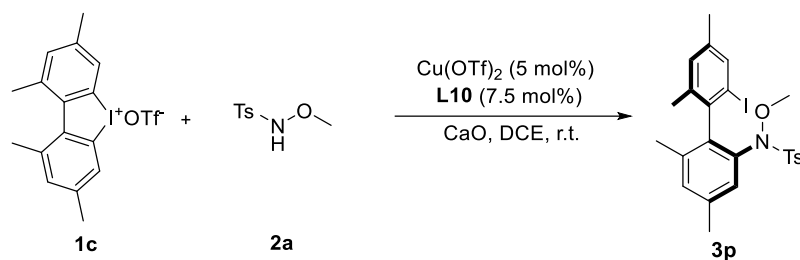

The reaction of **1c** (48.4 mg, 0.10 mmol, 1.0 equiv), **2a** (24.1 mg, 0.12 mmol, 1.2 equiv), Cu(OTf)<sub>2</sub> (1.8 mg, 5.0 mol%), **L10** (4.2 mg, 7.5 mol%) and CaO (11.2 mg, 0.20 mmol, 2.0 equiv) in DCE (2.0 mL) at room temperature for 6 h afforded **3p** (56.8 mg, >99%, 94% ee). R<sub>f</sub> = 0.5 (PE/EA = 10:1).  $[\alpha]_D^{20} = +0.4$  (c = 1.12, CHCl<sub>3</sub>). HPLC conditions: Chiralpak AD-H, isopropanol/hexane = 5:95, flow: 1.0 mL/min,  $\lambda$  = 254 nm. <sup>1</sup>H NMR (400 MHz, CDCl<sub>3</sub>)  $\delta$  7.60 (d, *J* = 8.4 Hz, 3H), 7.29 (d, *J* = 8.0 Hz, 2H), 7.10 (d, *J* = 8.8 Hz, 2H), 6.36 (s, 1H), 3.77 (s, 3H), 2.46 (s, 3H), 2.34 (s, 3H), 2.20 (s, 3H), 2.16 (s, 3H), 1.97 (s, 3H). <sup>13</sup>C NMR (101 MHz, CDCl<sub>3</sub>)  $\delta$  144.61, 140.22, 139.38, 139.24, 138.83, 138.75, 137.62, 137.44, 136.50, 132.16, 131.72, 130.80, 130.17, 128.93, 124.34, 101.42, 65.19, 21.71, 21.67, 20.96, 20.57, 20.11. HRMS (ESI): calcd for C<sub>24</sub>H<sub>26</sub>INO<sub>3</sub>Na (M+Na)<sup>+</sup> 558.0576, found 558.0574.

Compound **3q** was prepared following the **Procedure A**

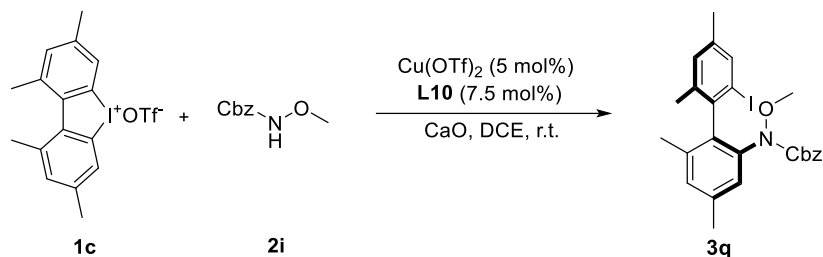

The reaction of **1c** (49.2 mg, 0.10 mmol, 1.0 equiv), **2i** (24.1 mg, 0.12 mmol, 1.2 equiv), Cu(OTf)<sub>2</sub> (1.8 mg, 5.0 mol%), **L10** (4.2 mg, 7.5 mol%) and CaO (11.2 mg, 0.20 mmol, 2.0 equiv) in DCE (2.0 mL) at room temperature for 6 h afforded **3q** (38.6 mg, 75%, 89% ee). R<sub>f</sub> = 0.5 (PE/EA = 10:1).  $[\alpha]_D^{20} = +32.3$  (c = 0.97, CHCl<sub>3</sub>). HPLC conditions: Chiralpak AD-H, isopropanol/hexane = 5:95, flow: 1.0 mL/min,  $\lambda$  = 254 nm. <sup>1</sup>H NMR (400 MHz, CDCl<sub>3</sub>)  $\delta$  7.58 (s, 1H), 7.37 – 7.27 (m, 5H), 7.14 (s, 1H), 6.99 (s, 1H), 6.94 (s, 1H), 5.18 (s, 2H), 3.50 (s, 3H), 2.37 (s, 3H), 2.29 (s, 3H), 1.96 (s, 3H), 1.91 (s, 3H). <sup>13</sup>C NMR (101 MHz, CDCl<sub>3</sub>)  $\delta$  155.22, 139.23, 138.99, 138.72, 137.86, 137.70, 137.67, 136.83, 136.74, 136.10, 131.49, 130.63, 128.32, 127.96, 127.92, 127.20, 101.89, 67.38, 61.83, 21.12, 21.00, 20.55, 19.76. HRMS (ESI): calcd for C<sub>25</sub>H<sub>26</sub>INO<sub>3</sub>Na (M+Na)<sup>+</sup> 538.0855, found 538.0851.

Compound **3r** was prepared following the **Procedure A**

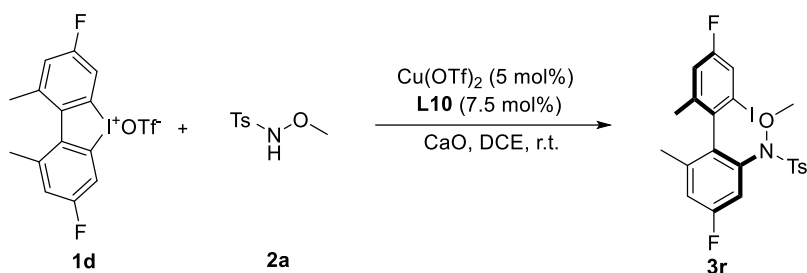

The reaction of **1d** (49.2 mg, 0.10 mmol, 1.0 equiv), **2a** (24.1 mg, 0.12 mmol, 1.2 equiv), Cu(OTf)<sub>2</sub> (1.8 mg, 5.0 mol%), **L10** (4.2 mg, 7.5 mol%) and CaO (11.2 mg, 0.20 mmol, 2.0 equiv) in DCE (2.0 mL) at room temperature for 6 h afforded **3r** (46 mg, 85%, 96% ee). R<sub>f</sub> = 0.5 (PE/EA = 10:1).  $[\alpha]_D^{20} = +91.5$  (c = 0.96, CHCl<sub>3</sub>). HPLC conditions: Chiralpak AD-H, isopropanol/hexane = 5:95, flow: 1.0 mL/min,  $\lambda$  = 254 nm. **<sup>1</sup>H NMR** (400 MHz, CDCl<sub>3</sub>)  $\delta$  7.58 (d, *J* = 8.4 Hz, 2H), 7.51 (dd, *J* = 7.8, 2.6 Hz, 1H), 7.32 (d, *J* = 8.0 Hz, 2H), 7.07 (dd, *J* = 9.2, 2.4 Hz, 1H), 7.01 (dd, *J* = 8.8, 2.4 Hz, 1H), 6.25 (dd, *J* = 9.6, 2.4 Hz, 1H), 3.83 (s, 3H), 2.47 (s, 3H), 2.23 (s, 3H), 1.99 (s, 3H). **<sup>19</sup>F NMR** (376 MHz, CDCl<sub>3</sub>)  $\delta$  -112.49, -112.51, -112.54, -114.08, -114.10, -114.10, -114.13. **<sup>13</sup>C NMR** (101 MHz, CDCl<sub>3</sub>)  $\delta$  162.66, 160.18, 145.24, 141.63 (d, *J* = 7.9 Hz), 141.33 (d, *J* = 9.1 Hz), 139.81 (d, *J* = 8.8 Hz), 137.91 (d, *J* = 3.6 Hz), 136.89 (d, *J* = 3.4 Hz), 130.89, 130.20, 129.24, 123.24 (d, *J* = 23.5 Hz), 117.77 (d, *J* = 21.2 Hz), 116.89 (d, *J* = 20.6 Hz), 110.80 (d, *J* = 23.5 Hz), 100.52 (d, *J* = 7.9 Hz), 65.42, 22.13 (d, *J* = 1.5 Hz), 21.74, 20.35 (d, *J* = 1.8 Hz). HRMS (ESI): calcd for C<sub>22</sub>H<sub>20</sub>F<sub>2</sub>INO<sub>3</sub>SNa (M+Na)<sup>+</sup> 566.0074, found 566.0078.

Compound **3s** was prepared following the **Procedure A**

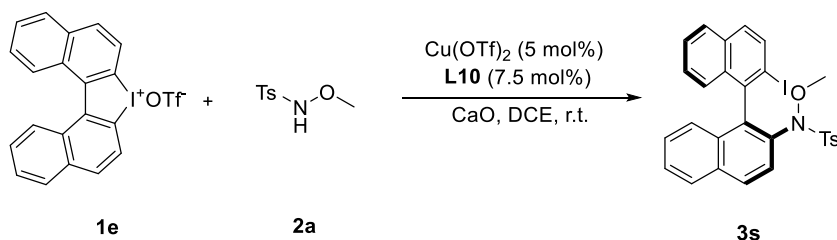

The reaction of **1e** (26.4 mg, 0.05 mmol, 1.0 equiv), **2a** (12 mg, 0.06 mmol, 1.2 equiv), Cu(OTf)<sub>2</sub> (0.9 mg, 5.0 mol%), **L10** (2.4 mg, 7.5 mol%) and CaO (5.6 mg, 0.10 mmol, 2.0 equiv) in DCE (1.0 mL) at room temperature for 12 h afforded **3s** (21.1 mg, 73%, >99% ee). R<sub>f</sub> = 0.3 (PE/EA = 10:1).  $[\alpha]_D^{20} = -24.2$  (c = 0.38, CHCl<sub>3</sub>). HPLC conditions: Chiralpak AD-H, isopropanol/hexane = 10:90, flow: 1.0 mL/min,  $\lambda$  = 254 nm. **<sup>1</sup>H NMR** (400 MHz, CDCl<sub>3</sub>)  $\delta$  8.04 (d, *J* = 8.8 Hz, 1H), 7.92 (dd, *J* = 8.2, 2.8 Hz, 2H), 7.84 (d, *J* = 8.8 Hz, 1H), 7.70 (d, *J* = 8.4 Hz, 1H), 7.53 (tdd, *J* = 8.0, 6.8, 1.2 Hz, 2H), 7.43 – 7.29 (m, 5H), 7.21 (dd, *J* = 8.4, 3.2 Hz, 3H), 7.03 (d, *J* = 8.8 Hz, 1H), 3.55 (s, 3H), 2.44 (s, 3H). **<sup>13</sup>C NMR** (101 MHz, CDCl<sub>3</sub>)  $\delta$  144.71, 139.89, 139.30, 137.17, 135.54, 134.27, 133.43, 132.62, 132.37, 132.15, 129.94, 129.54, 129.17, 129.14, 128.70, 128.02, 127.61, 127.20, 127.17, 126.98, 126.41, 126.23, 123.23, 100.64, 65.13, 21.70. HRMS (ESI): calcd for C<sub>28</sub>H<sub>22</sub>INO<sub>3</sub>SNa (M+Na)<sup>+</sup> 602.0263, found 602.0273.

Compound **3t** was prepared following the **Procedure A**

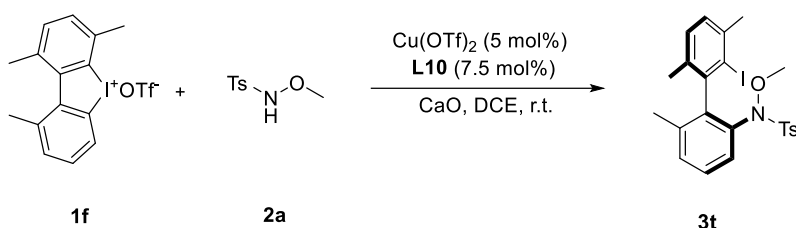

The reaction of **1f** (47.0 mg, 0.10 mmol, 1.0 equiv), **2a** (24.1 mg, 0.12 mmol, 1.2 equiv), Cu(OTf)<sub>2</sub> (1.8 mg, 5.0 mol%), **L10** (4.2 mg, 7.5 mol%) and CaO (11.2 mg, 0.20 mmol, 2.0 equiv) in DCE (2.0 mL) at room temperature for 6 h afforded **3t** (48.2 mg, 93%, 95% ee). R<sub>f</sub> = 0.5 (PE/EA = 10:1).  $[\alpha]_D^{20} = +0.7$  (c = 1.05, CHCl<sub>3</sub>). HPLC conditions: Chiralpak AD-H, isopropanol/hexane = 5:95, flow: 1.0 mL/min,  $\lambda$  = 254 nm. <sup>1</sup>H NMR (400 MHz, CDCl<sub>3</sub>)  $\delta$  7.61 (d, *J* = 8.0 Hz, 2H), 7.28 (d, *J* = 7.6 Hz, 3H), 7.22 – 7.17 (m, 2H), 7.15 (t, *J* = 8.0 Hz, 1H), 6.63 (d, *J* = 7.6 Hz, 1H), 3.70 (s, 3H), 2.49 (s, 3H), 2.46 (s, 3H), 2.21 (s, 3H), 2.01 (s, 3H). <sup>13</sup>C NMR (101 MHz, CDCl<sub>3</sub>)  $\delta$  144.64, 144.24, 142.16, 139.35, 138.92, 137.72, 136.57, 132.20, 130.90, 130.06, 129.58, 129.08, 128.67, 127.78, 123.74, 107.86, 65.12, 29.55, 21.69, 21.41, 20.14. HRMS (ESI): calcd for C<sub>23</sub>H<sub>24</sub>INO<sub>3</sub>SN<sub>a</sub> (M+Na)<sup>+</sup> 544.0419, found 544.0421.

#### Synthesis of compound **4a**

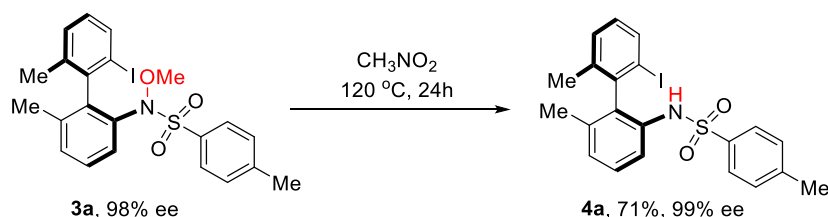

In a 10 mL schlenk tube capped with PTFE screw cap, **3a** (101 mg, 0.20 mmol, 98% ee) was dissolved in CH<sub>3</sub>NO<sub>2</sub> (1.0 mL) under nitrogen. The mixture was heated to 120 °C and stirred for 24 h. After complete consumption of starting material, the reaction was cooled to room temperature, the solvent was removed and the residue was purified by column chromatography on silica gel (hexanes/ethyl acetate = 20:1) to afford the desired product **4a** (67.7 mg, 71%, 99% ee). R<sub>f</sub> = 0.3 (PE/EA = 10:1).  $[\alpha]_D^{20} = +31.6$  (c = 0.98, CHCl<sub>3</sub>). HPLC conditions: Chiralpak ID-H, isopropanol/hexane = 5:95, flow: 1.0 mL/min,  $\lambda$  = 254 nm. <sup>1</sup>H NMR (400 MHz, CDCl<sub>3</sub>)  $\delta$  7.81 (d, *J* = 8.0 Hz, 1H), 7.77 – 7.71 (m, 2H), 7.51 (d, *J* = 8.0 Hz, 1H), 7.28 (d, *J* = 7.6 Hz, 1H), 7.23 (t, *J* = 8.6 Hz, 3H), 7.04 (t, *J* = 7.8 Hz, 1H), 6.98 (d, *J* = 7.6 Hz, 1H), 5.98 (s, 1H), 2.38 (s, 3H), 1.83 (s, 3H), 1.76 (s, 3H). <sup>13</sup>C NMR (101 MHz, CDCl<sub>3</sub>)  $\delta$  143.92, 139.51, 139.07, 137.46, 136.73, 136.60, 133.73, 132.53, 130.69, 130.40, 129.62, 128.67, 127.55, 125.44, 114.96, 101.38, 21.48, 20.77, 19.70. HRMS (ESI): calcd for C<sub>21</sub>H<sub>20</sub>INO<sub>2</sub>SN<sub>a</sub> (M+Na)<sup>+</sup> 500.0157, found 500.0156.

#### Synthesis of compound **5j**

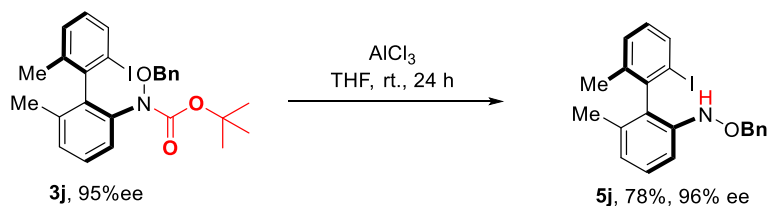

To a 25 mL Schleck tube containing **3j** (106 mg, 0.20 mmol, 1.0equiv, 95% ee) and THF (1.0 mL) was added anhydrous AlCl<sub>3</sub> (80 mg, 0.60 mmol, 3.0 equiv) as one portion under nitrogen, and stirred for 24



h at room temperature. After complete consumption of starting material, the solution was quenched with 4M HCl solution (2 mL) and water (10 mL), extracted with ethyl acetate (10 mL x 2), dried over anhydrous sodium sulfate and purified by flash column chromatography on silica gel (hexanes/ethyl acetate = 50:1) to afford the desired product **5j** (66.4 mg, 78%, 96% ee).  $R_f$  = 0.7 (PE/EA = 20:1).  $[\alpha]_D^{20}$  = +39.8 ( $c$  = 1.23,  $\text{CHCl}_3$ ). HPLC conditions: Chiralpak OD-H, isopropanol/hexane = 1:99, flow: 1.0 mL/min,  $\lambda$  = 254 nm. **<sup>1</sup>H NMR** (400 MHz,  $\text{CDCl}_3$ )  $\delta$  7.82 (t,  $J$  = 7.6 Hz, 1H), 7.43 – 7.26 (m, 7H), 7.15 (t,  $J$  = 9.2 Hz, 1H), 7.04 – 6.90 (m, 2H), 6.52 (d,  $J$  = 10.8 Hz, 1H), 4.80 (qd,  $J$  = 11.1, 8.4 Hz, 2H), 2.05 (d,  $J$  = 9.2 Hz, 3H), 1.92 (d,  $J$  = 9.6 Hz, 3H). **<sup>13</sup>C NMR** (101 MHz,  $\text{CDCl}_3$ )  $\delta$  144.75, 140.90, 138.90, 137.13, 136.50, 135.73, 130.30, 129.56, 129.19, 128.92, 128.68, 128.38, 128.14, 123.26, 112.13, 101.40, 77.35, 21.17, 19.32. HRMS (ESI): calcd for  $\text{C}_{21}\text{H}_{20}\text{INONa}$  ( $\text{M}+\text{Na}$ )<sup>+</sup> 452.0487, found 452.0489.

#### Synthesis of compound **6j** and **7j**

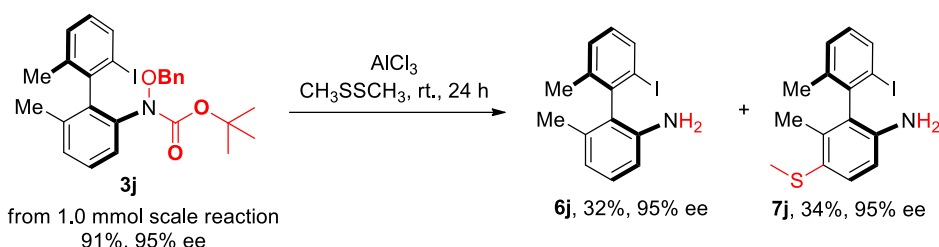

To a 25 mL Schleck tube containing **3j** (481.3 mg, 0.91 mmol, 1.0 equiv, 95% ee) and dimethyl disulfide (5.0 mL) was added anhydrous  $\text{AlCl}_3$  (364 mg, 2.73 mmol, 3.0 equiv) as one portion under nitrogen, and stirred for 24 h at room temperature. After complete consumption of starting material, the solution was quenched with 4M HCl solution (4 mL) and water (10 mL), extracted with ethyl acetate (10 mL x 2), dried over anhydrous sodium sulfate and purified by flash column chromatography on silica gel (hexanes/ethyl acetate = 50:1) to afford product **6j** (92.6 mg, 32%, 95% ee) and **7j** (114.2 mg, 34%, 95% ee).

**6j**:  $R_f$  = 0.5 (PE/EA = 10:1).  $[\alpha]_D^{20}$  = +34.1 ( $c$  = 0.74,  $\text{CHCl}_3$ ). HPLC conditions: Chiralpak AD-H, isopropanol/hexane = 1:99, flow: 1.0 mL/min,  $\lambda$  = 254 nm. **<sup>1</sup>H NMR** (400 MHz,  $\text{CDCl}_3$ )  $\delta$  7.83 (d,  $J$  = 8.0 Hz, 1H), 7.30 (d,  $J$  = 7.6 Hz, 1H), 7.13 (t,  $J$  = 7.6 Hz, 1H), 6.98 (t,  $J$  = 7.6 Hz, 1H), 6.73 (d,  $J$  = 7.6 Hz, 1H), 6.65 (d,  $J$  = 8.0 Hz, 1H), 3.29 (s, 2H), 2.09 (s, 3H), 1.89 (s, 3H). **<sup>13</sup>C NMR** (101 MHz,  $\text{CDCl}_3$ )  $\delta$  142.87, 142.04, 139.04, 137.14, 136.22, 130.31, 129.65, 129.35, 128.53, 120.01, 112.92, 102.08, 21.13, 19.71. HRMS (ESI): calcd for  $\text{C}_{14}\text{H}_{14}\text{INNa}$  ( $\text{M}+\text{Na}$ )<sup>+</sup> 346.0069, found 346.0063.

**7j**:  $R_f$  = 0.4 (PE/EA = 10:1).  $[\alpha]_D^{20}$  = -14.1 ( $c$  = 1.40,  $\text{CHCl}_3$ ). HPLC conditions: Chiralpak AD-H, isopropanol/hexane = 2:98, flow: 1.0 mL/min,  $\lambda$  = 254 nm. **<sup>1</sup>H NMR** (400 MHz,  $\text{CDCl}_3$ )  $\delta$  7.82 (d,  $J$  = 7.6 Hz, 1H), 7.30 (d,  $J$  = 6.8 Hz, 1H), 7.24 (d,  $J$  = 8.4 Hz, 1H), 6.98 (t,  $J$  = 7.6 Hz, 1H), 6.66 (d,  $J$  = 8.4 Hz, 1H), 3.67 – 2.61 (broad, 2H), 2.40 (s, 3H), 2.07 (s, 3H), 1.99 (s, 3H). **<sup>13</sup>C NMR** (101 MHz,  $\text{CDCl}_3$ )  $\delta$  142.09, 141.70, 139.00, 137.23, 136.52, 130.41, 130.37, 130.12, 129.45, 125.49, 113.51, 101.99, 21.16, 18.05, 17.00. HRMS (ESI): calcd for  $\text{C}_{15}\text{H}_{17}\text{INS}$  ( $\text{M}+\text{H}$ )<sup>+</sup> 370.0126, found 370.0131.

#### References

1. Zhao, K.; Duan, L.; Xu, S.; Jiang, L.; Fu, Y.; Gu, Z. *Chem* **2018**, *4*, 599.
2. Reddy, L. R.; Gupta, A. P.; Liu, Y. *J. Org. Chem.* **2011**, *76*, 3409.
3. Zuo, Z.; Cong, H.; Li, W.; Choi, J.; Fu, G. C.; Macmillan, W. C. *J. Am. Chem. Soc.* **2016**, *138*, 1832.

## Copies of NMR Spectroscopies

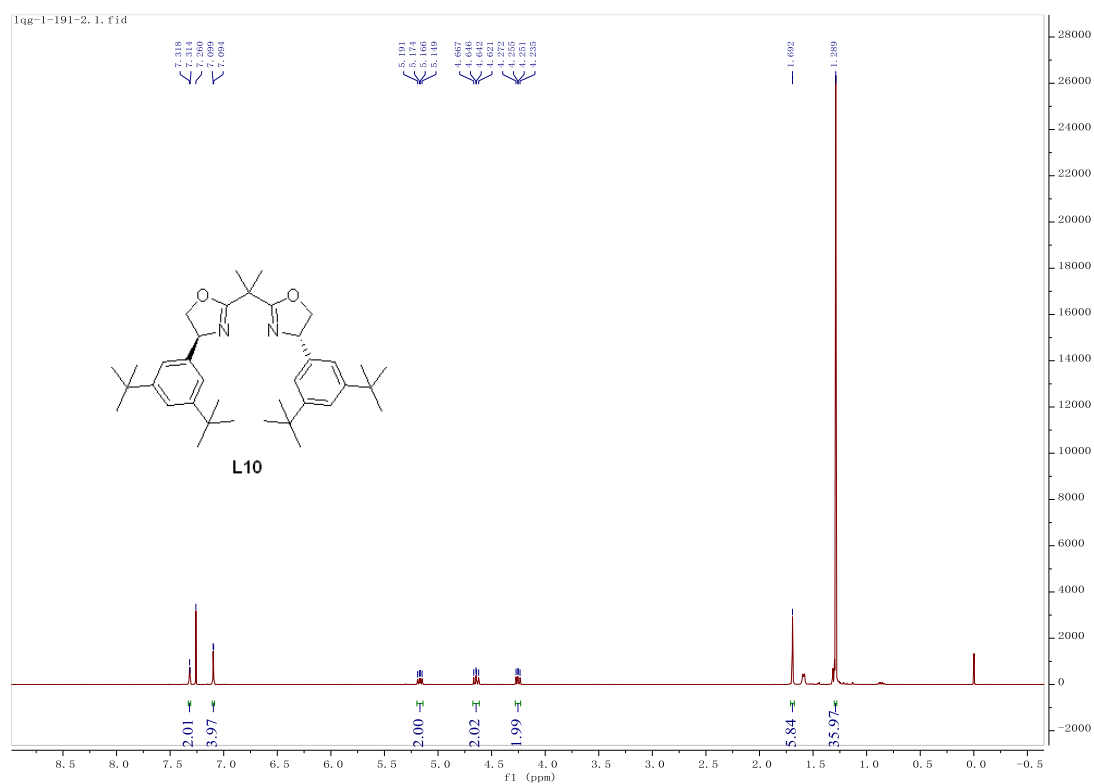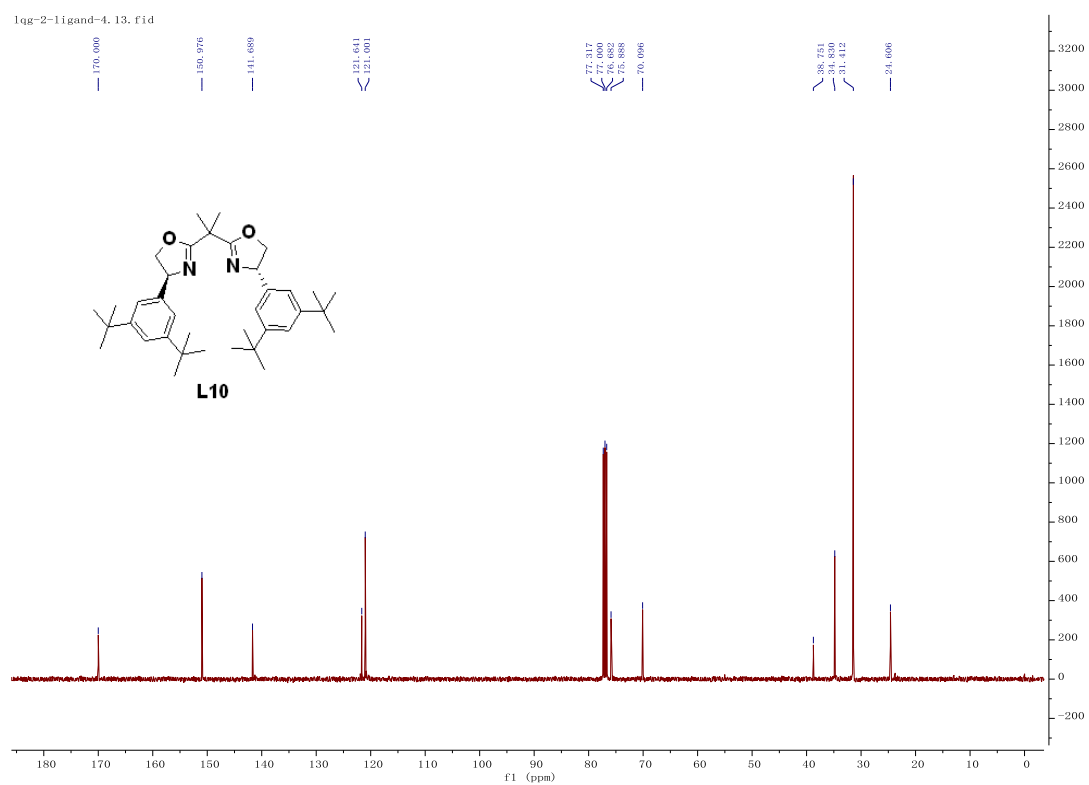

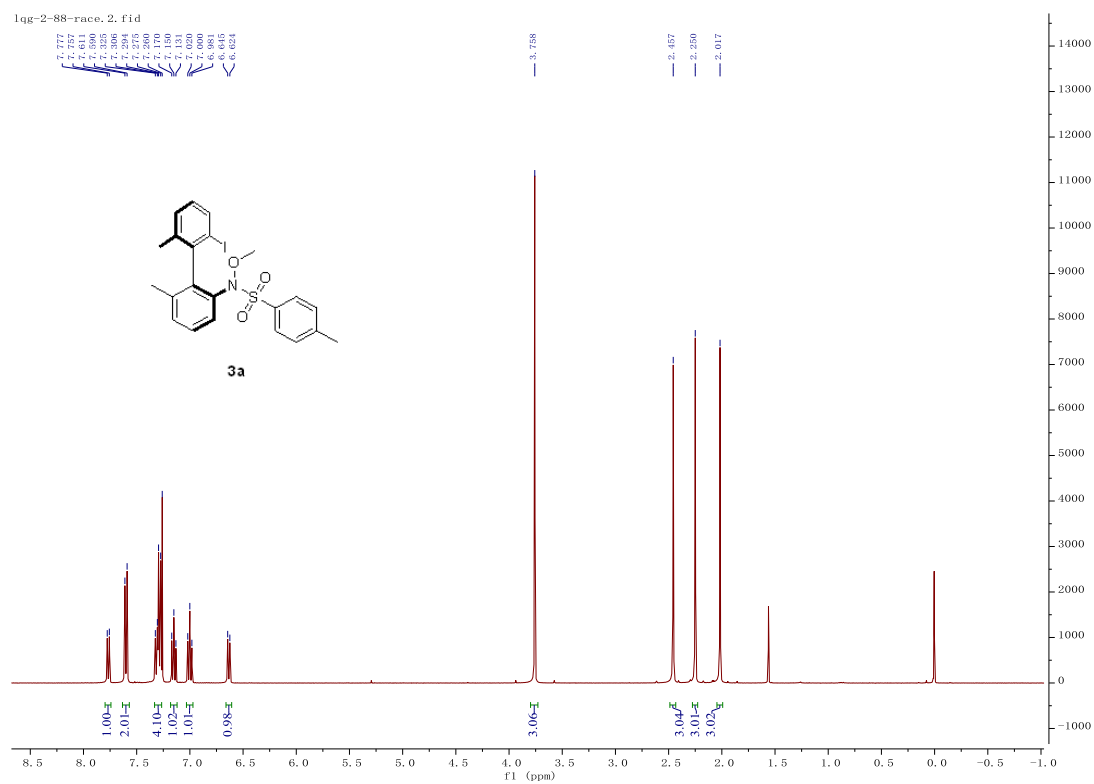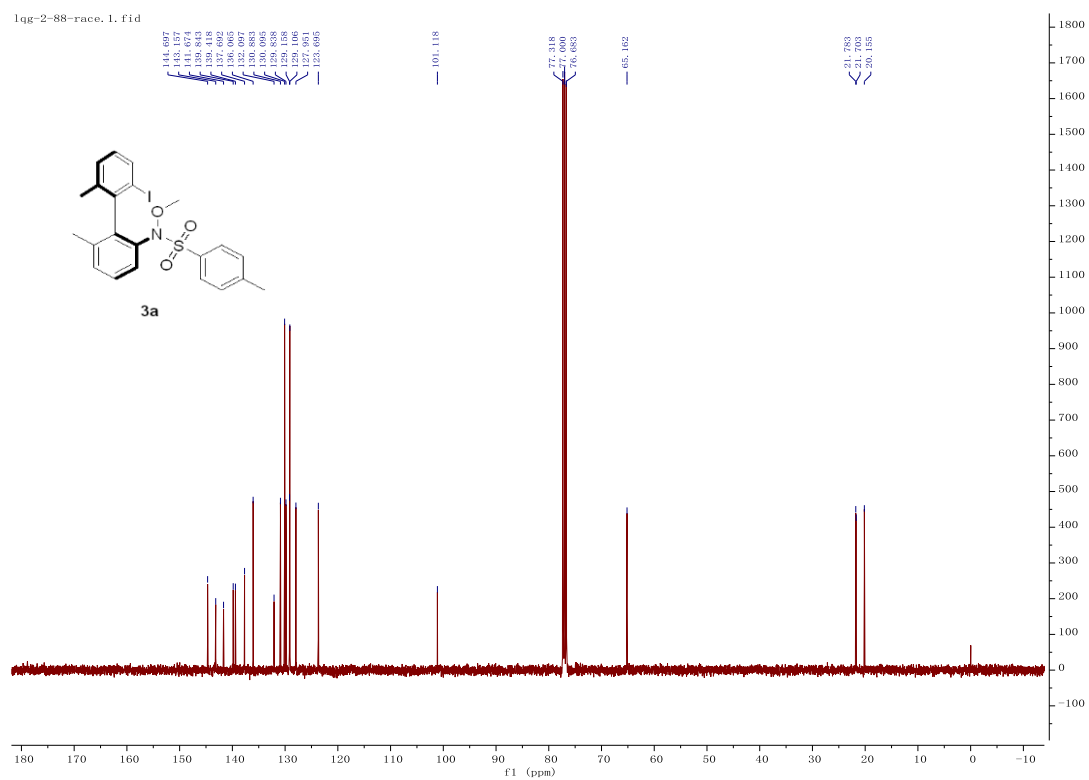

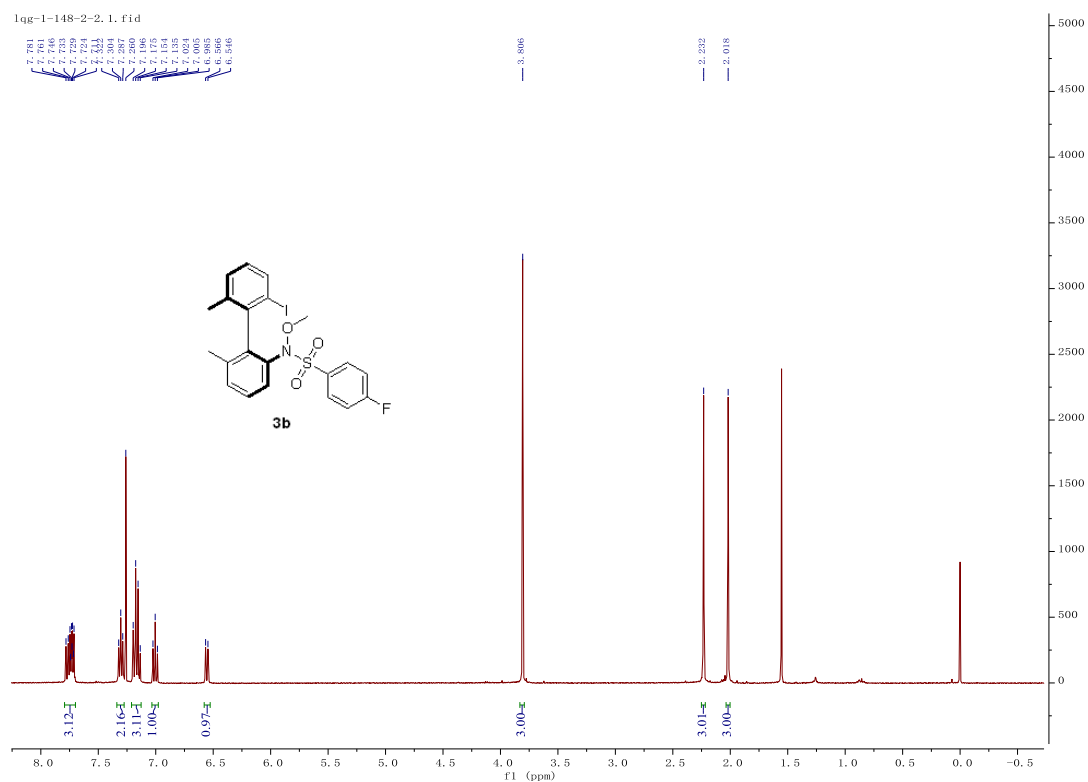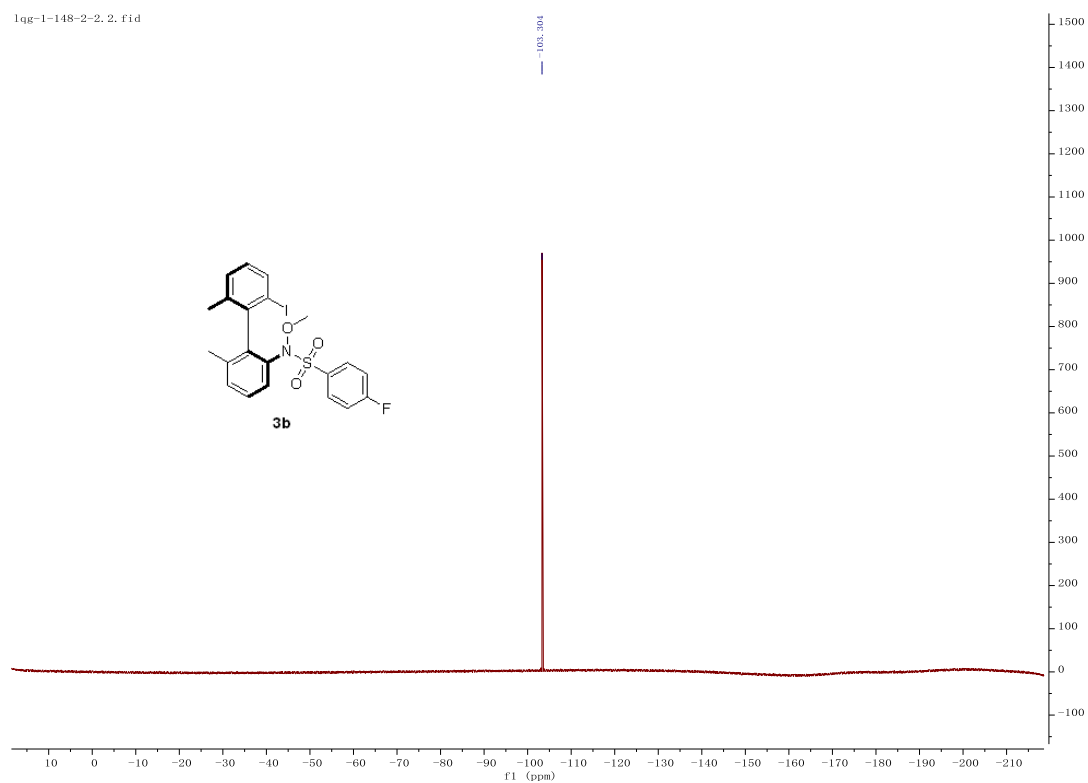

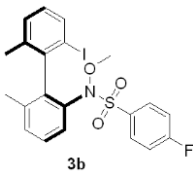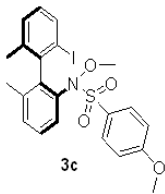

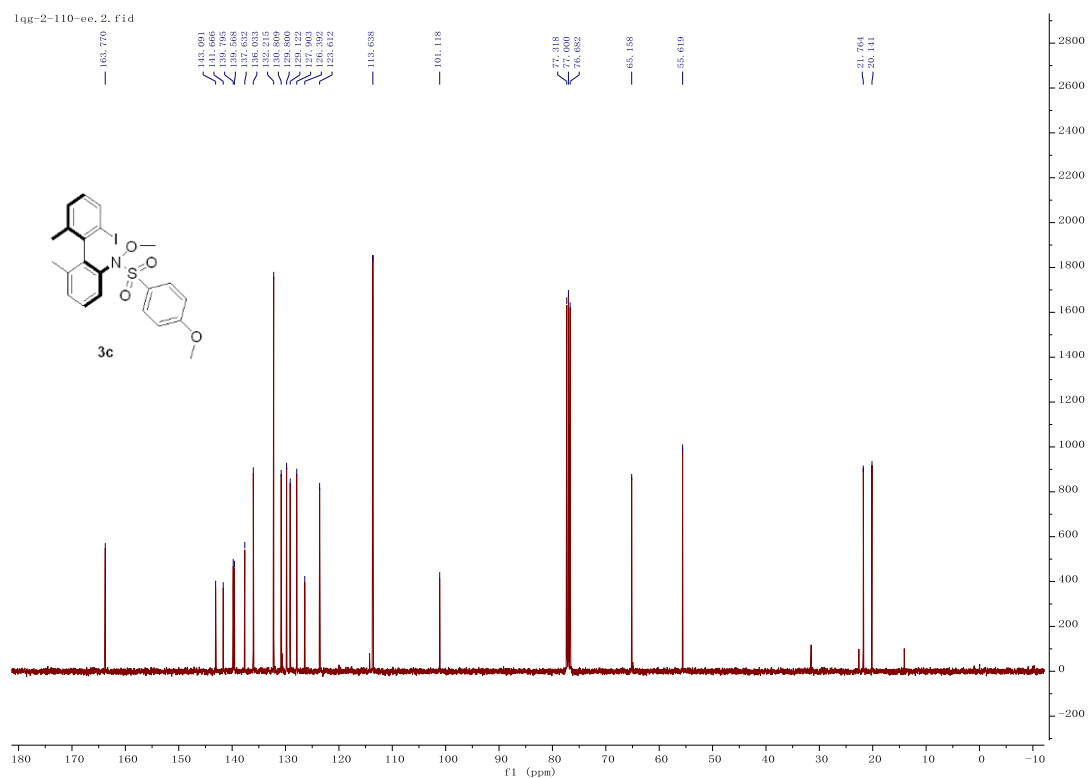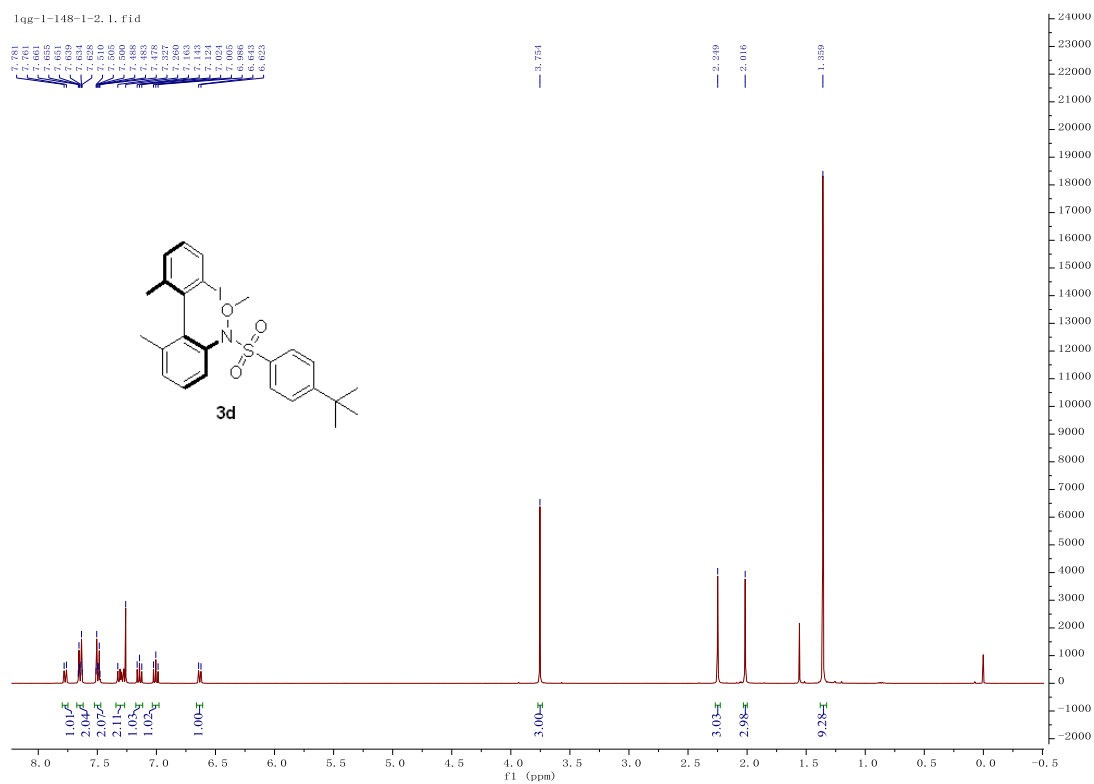

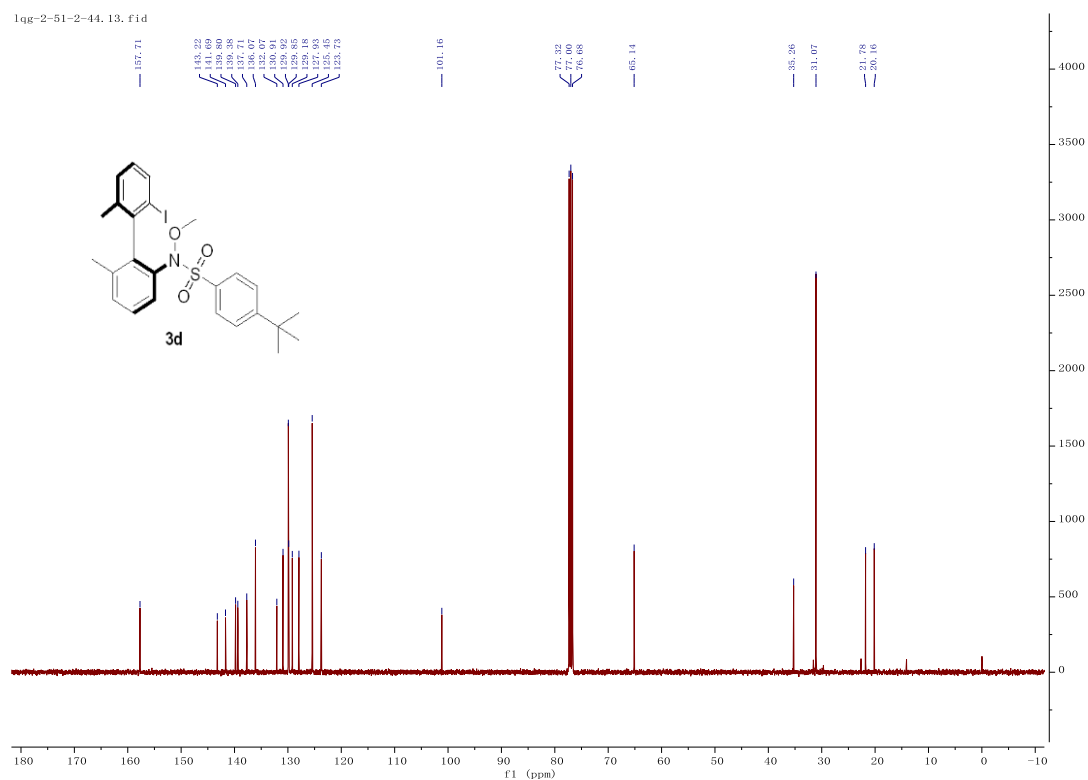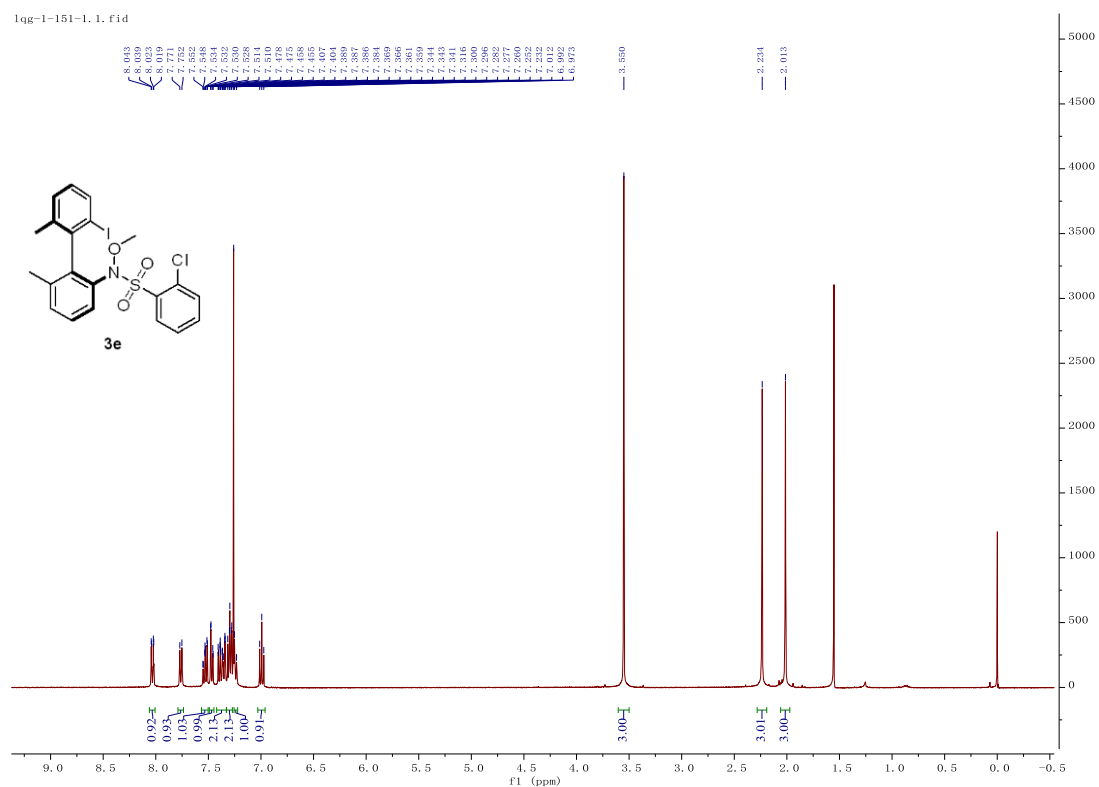

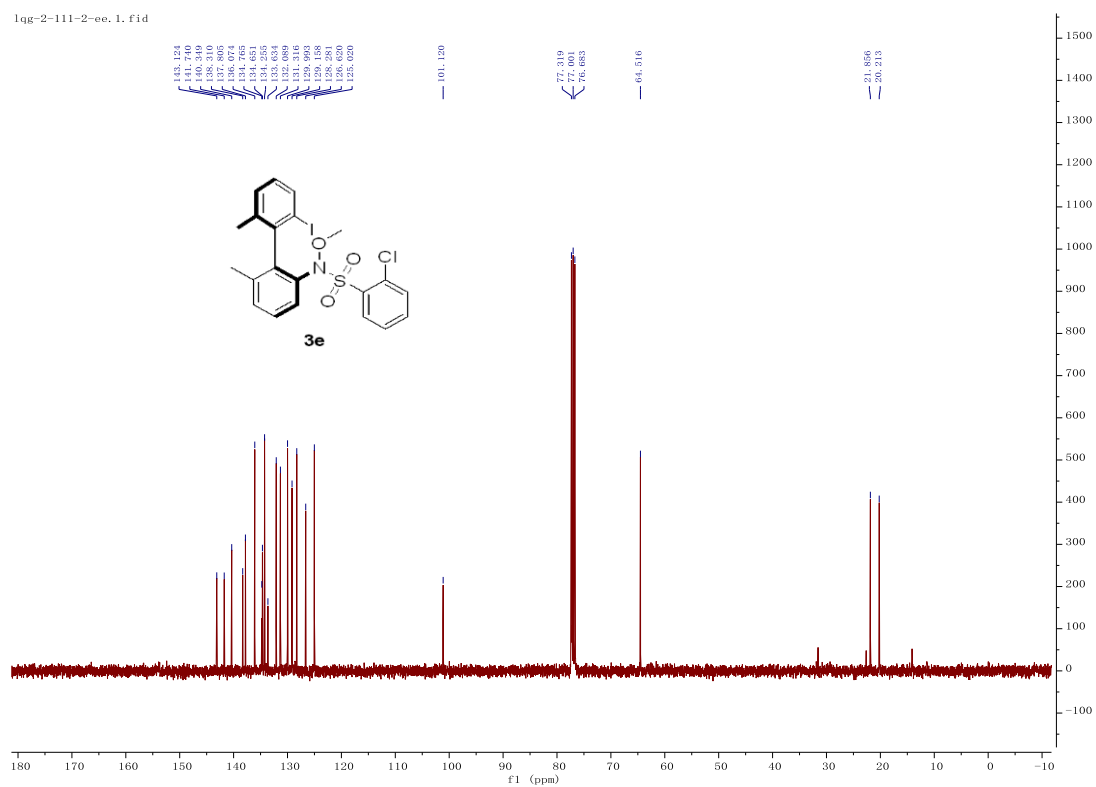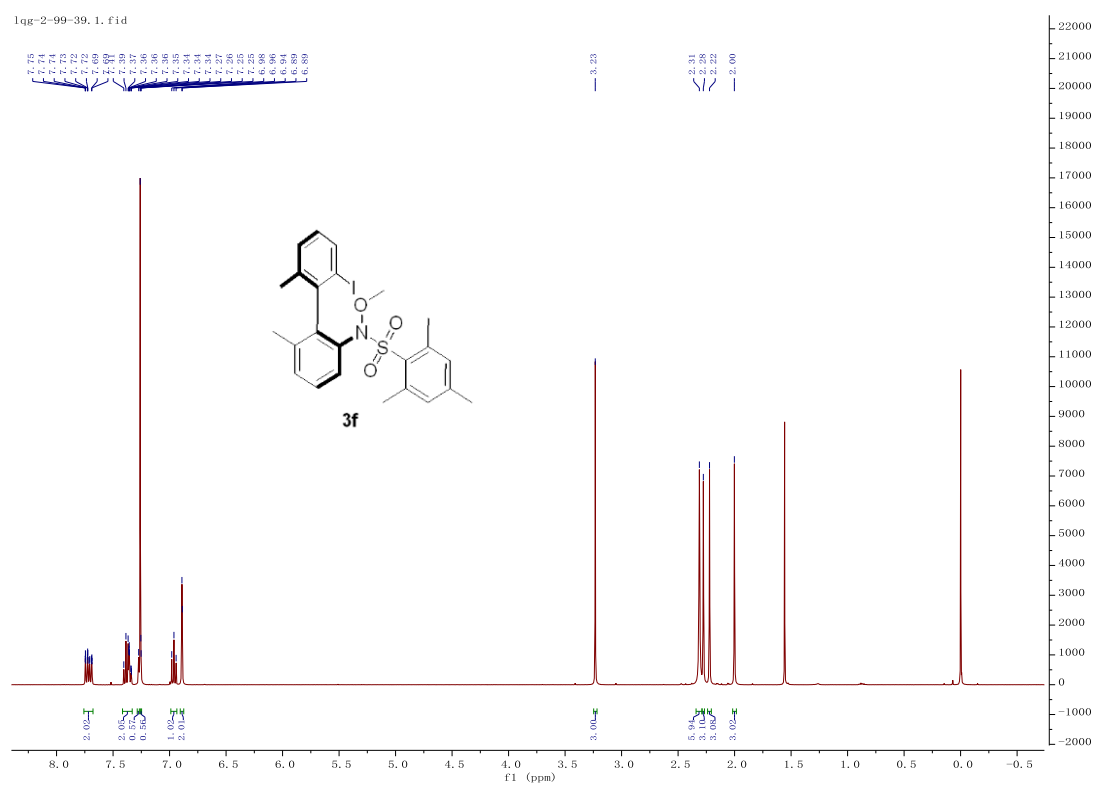



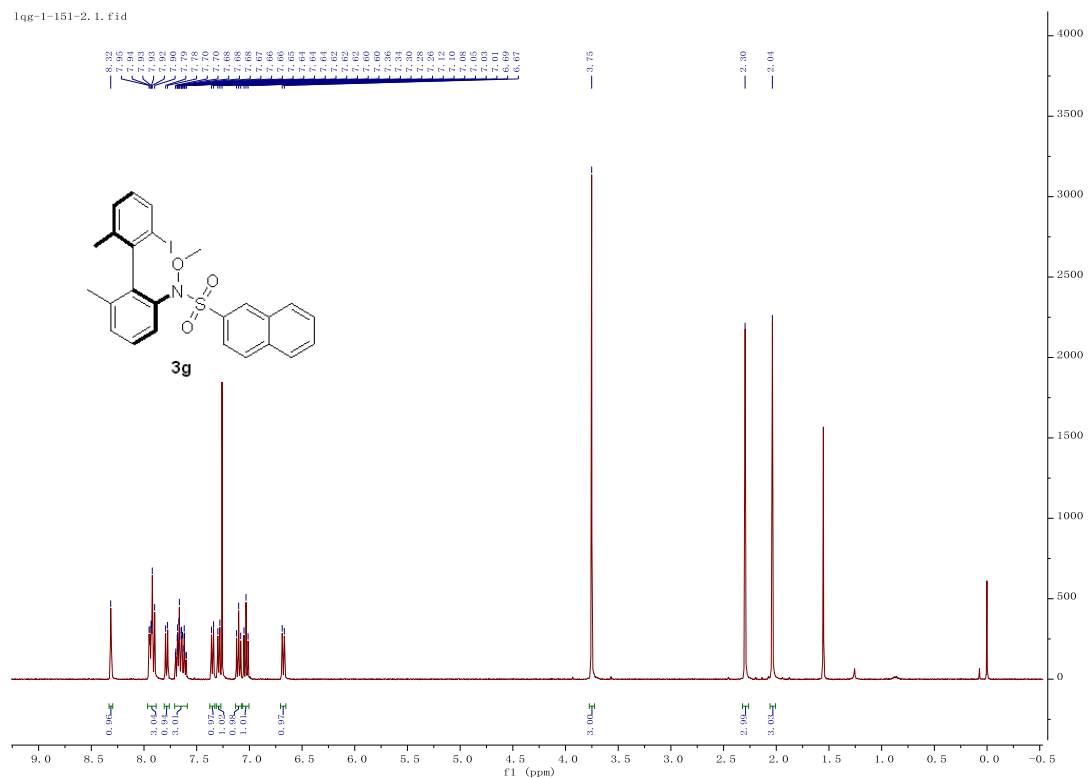

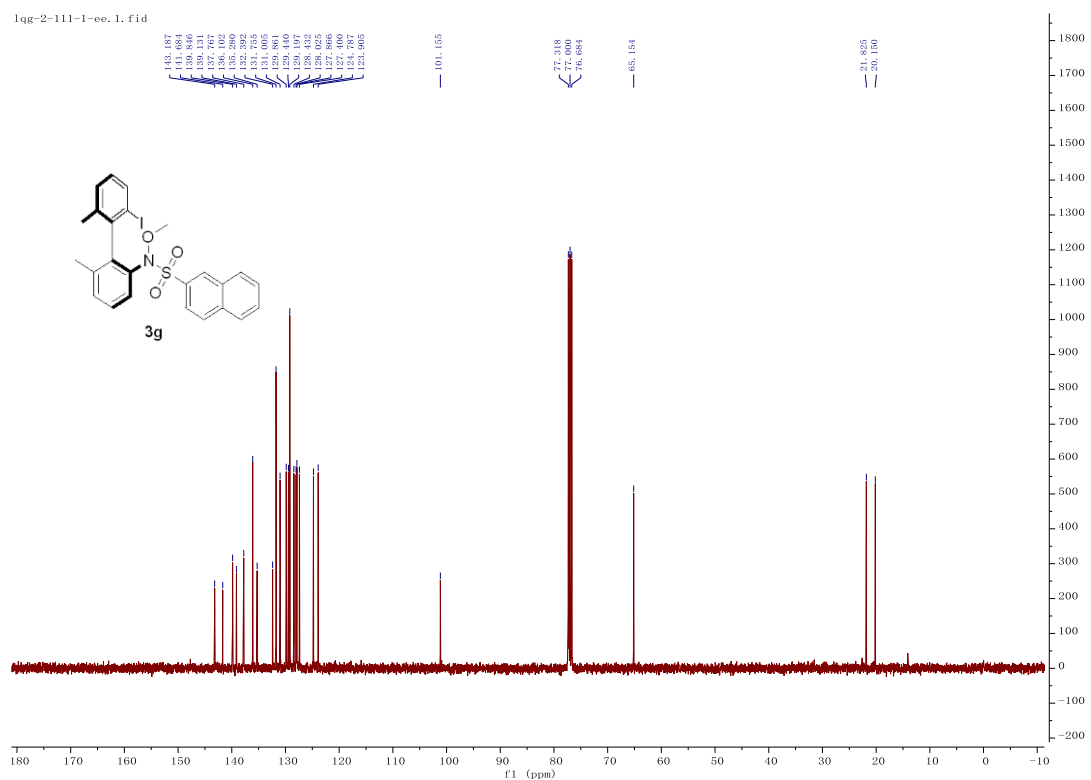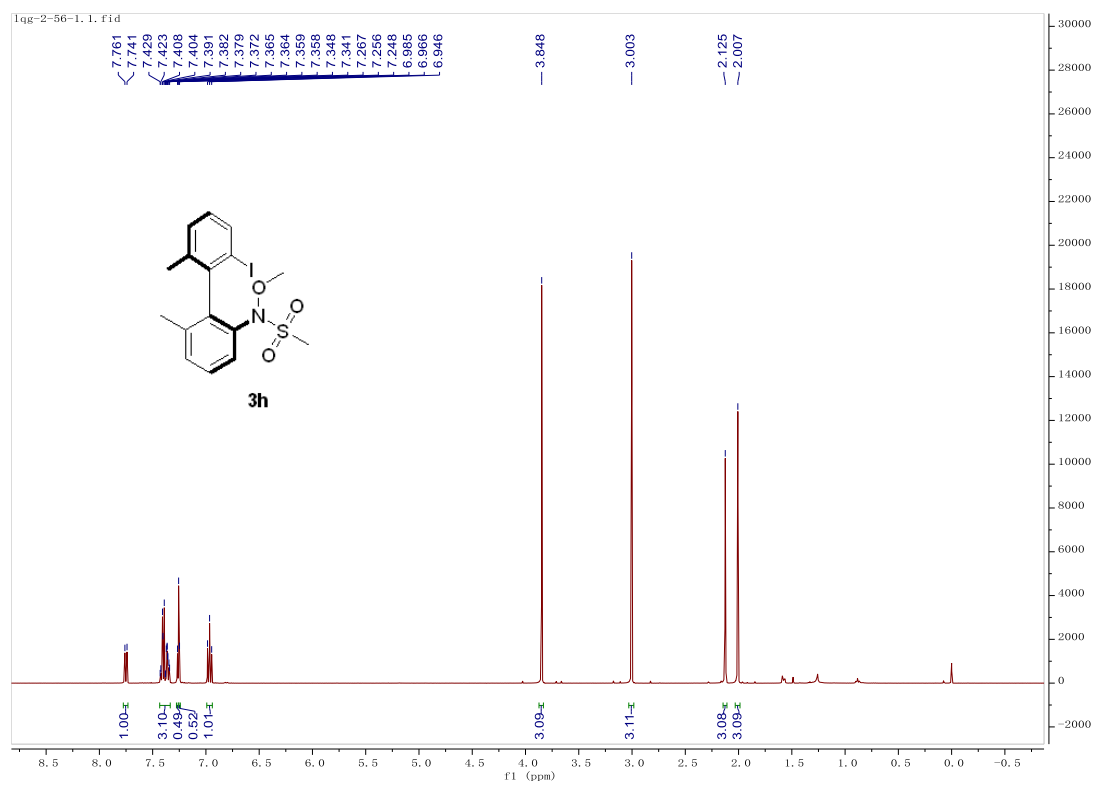

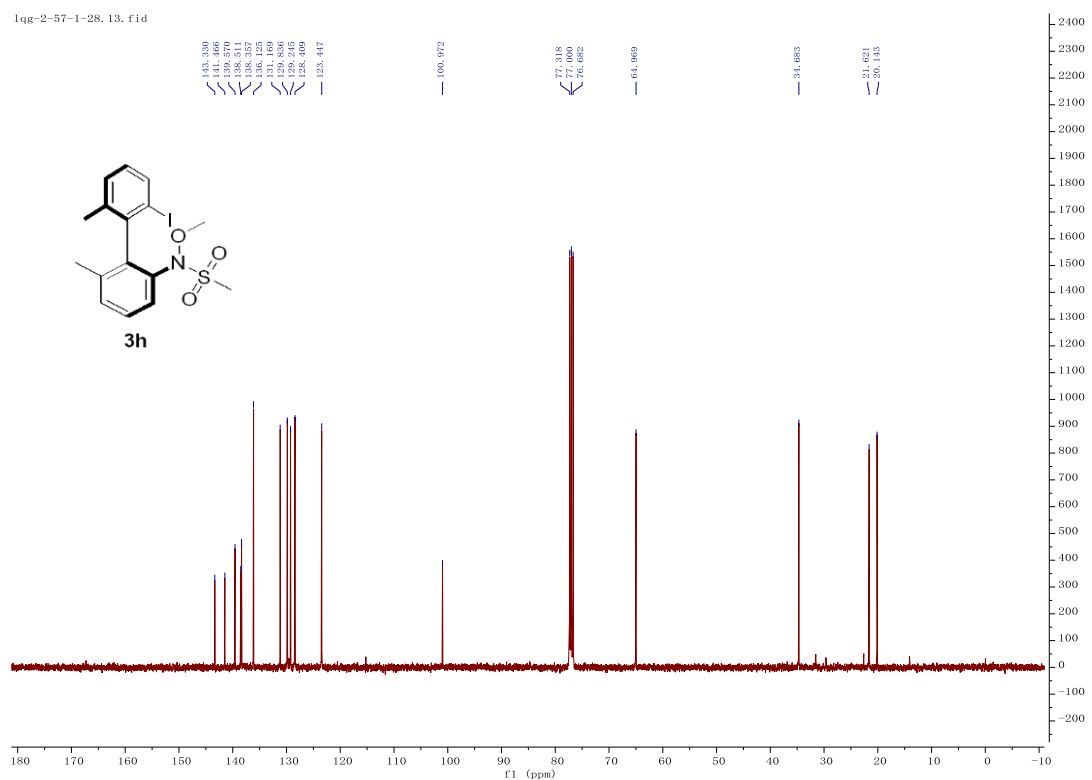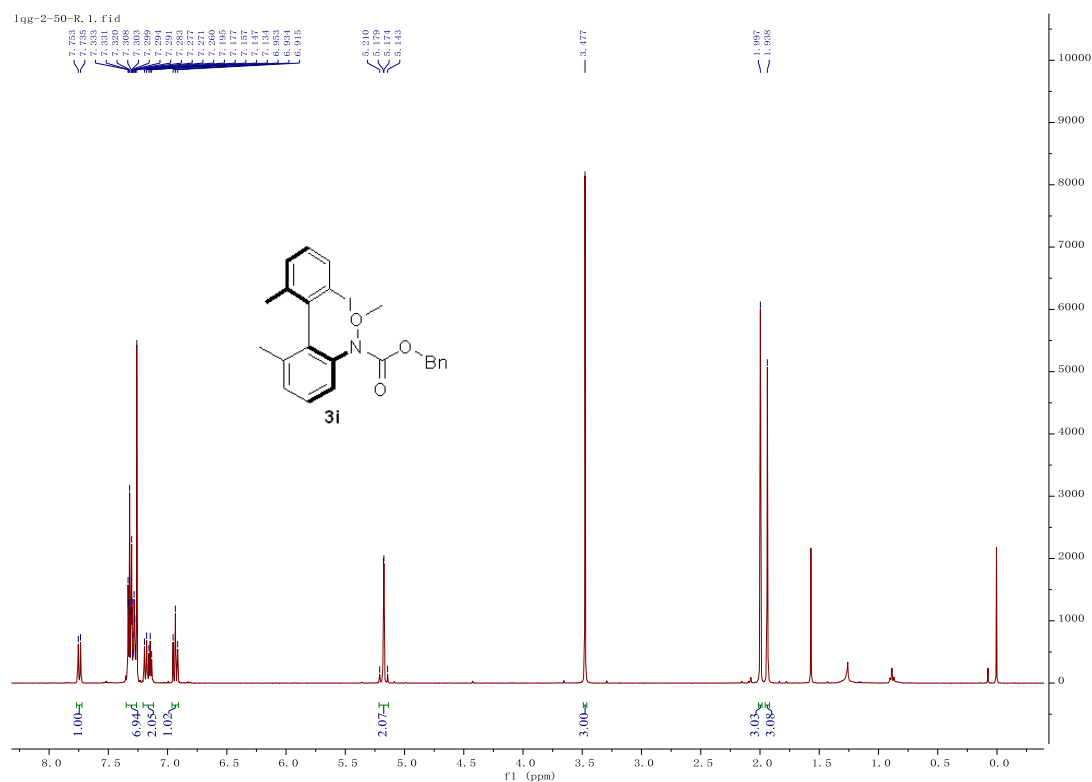

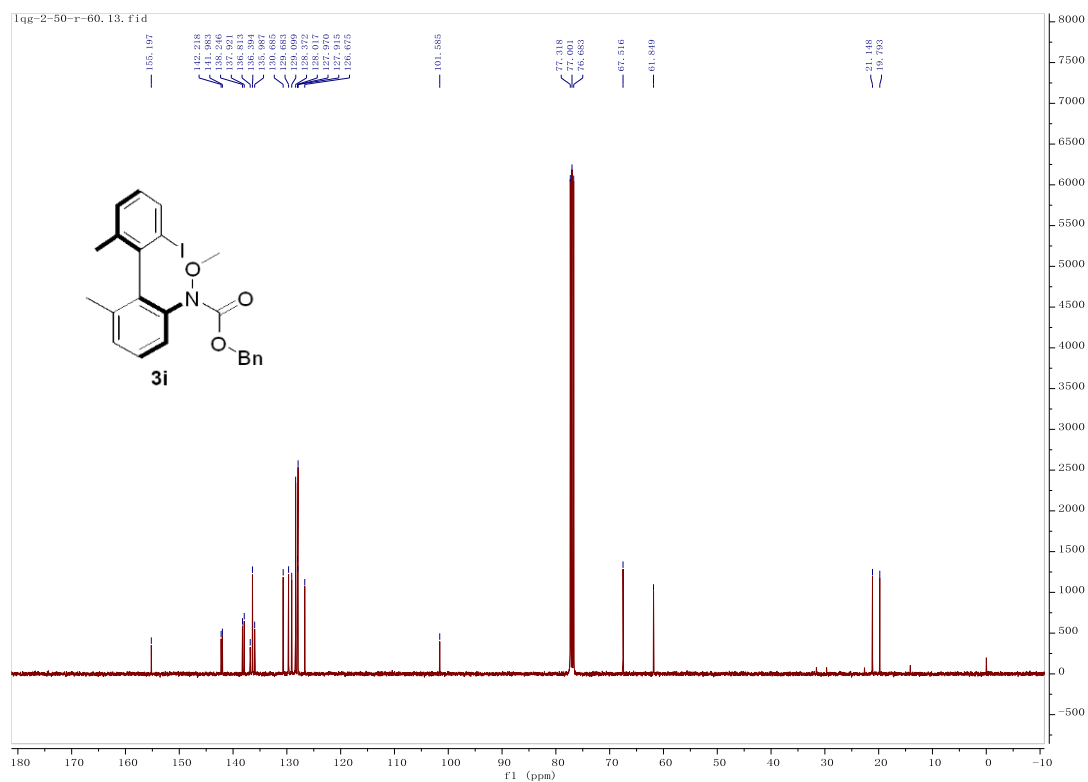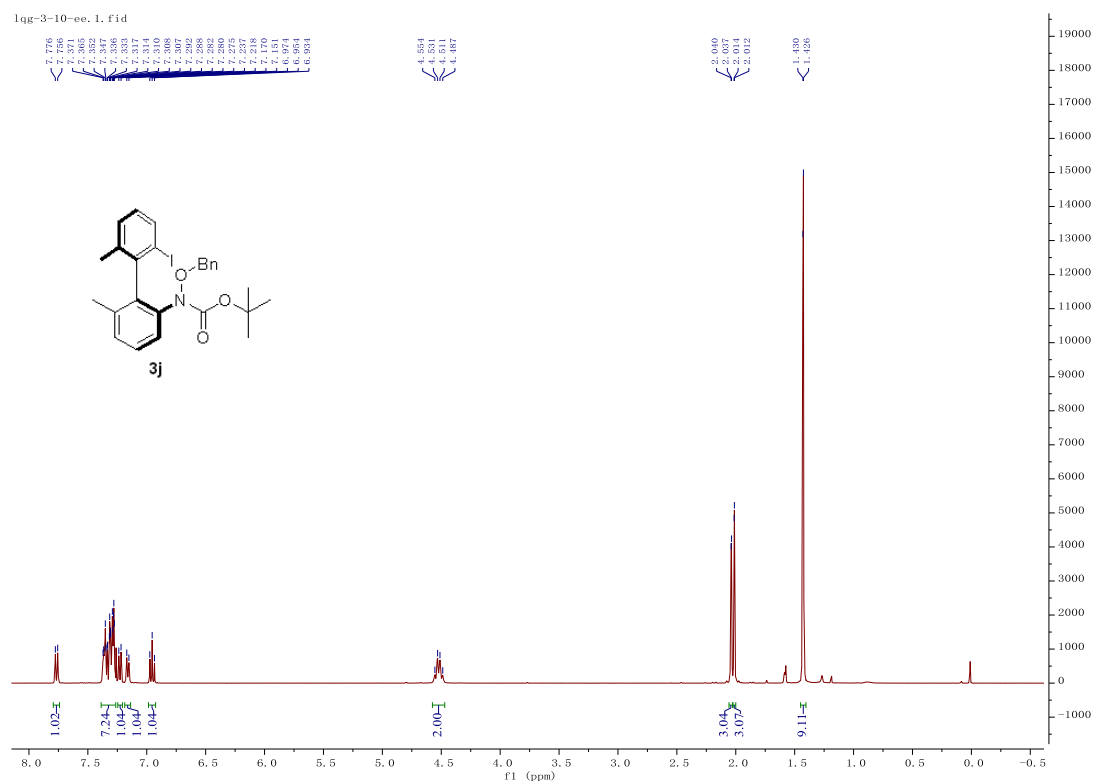

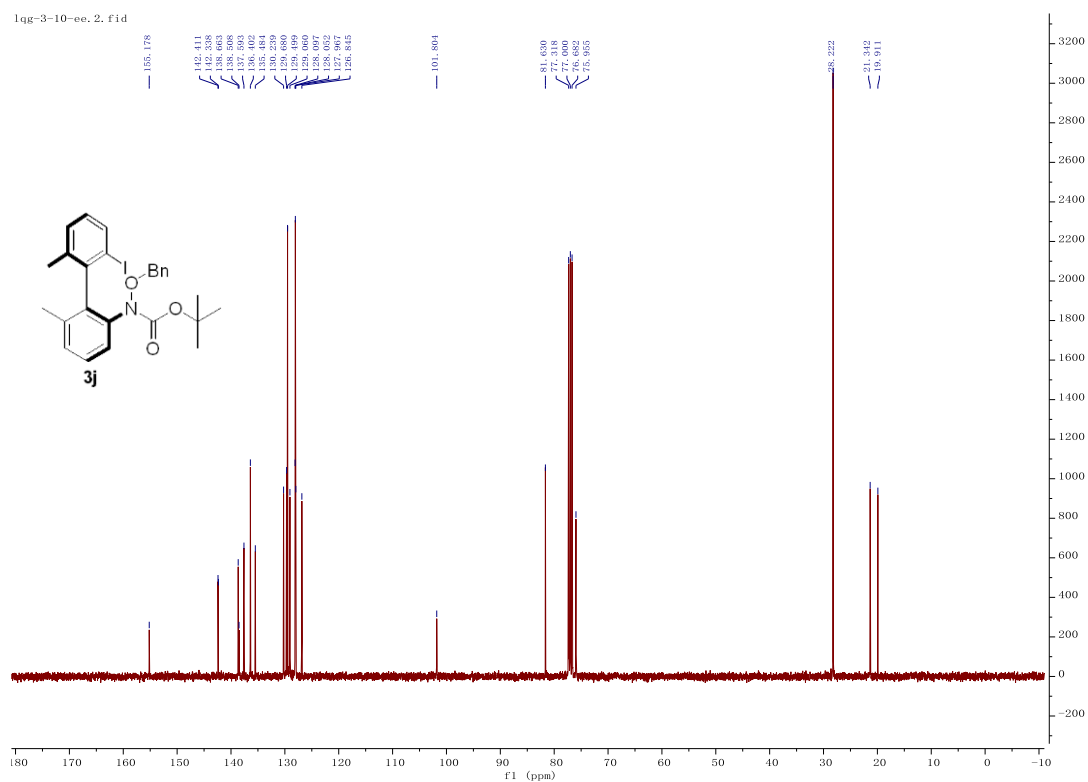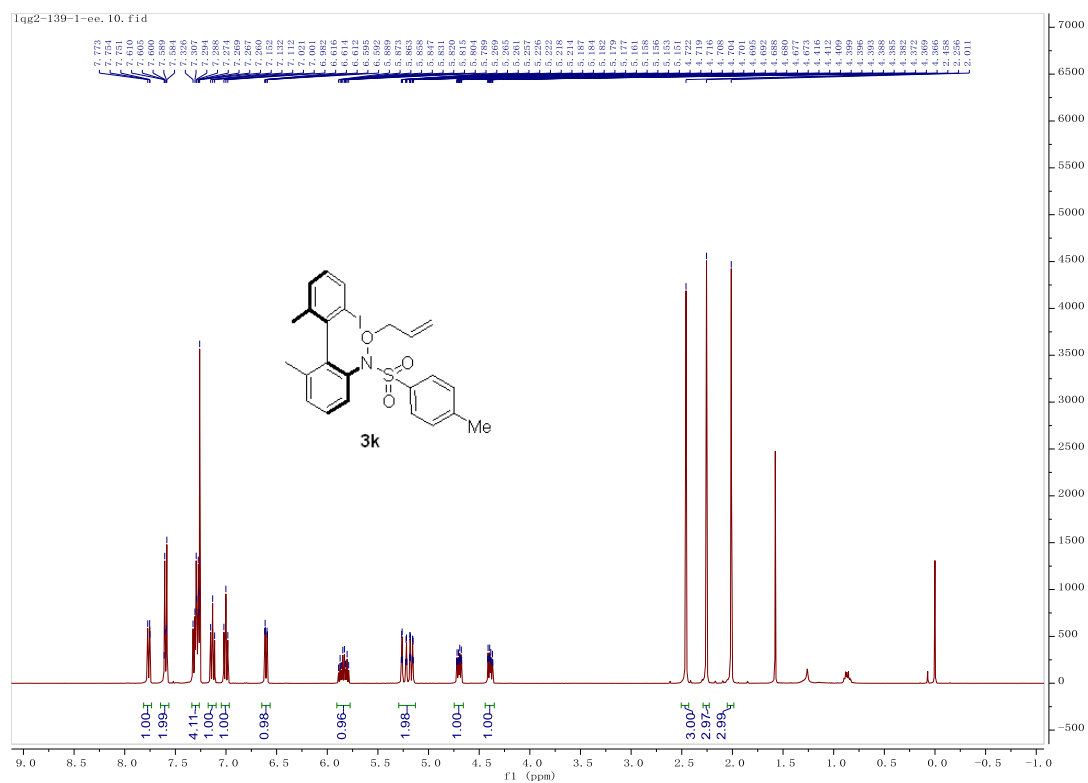

13C NMR spectrum of compound 3k. The chemical structure of 3k is shown in the top left. The spectrum displays peaks corresponding to the carbon atoms in the molecule, with the following chemical shifts (ppm) labeled above the peaks:

- 144.707
- 143.657
- 143.528
- 139.982
- 139.602
- 139.582
- 136.982
- 132.255
- 132.215
- 130.715
- 130.516
- 130.275
- 129.715
- 129.688
- 129.090
- 127.715
- 123.793
- 119.351
- 101.004
- 78.439
- 77.000
- 77.000
- 76.682
- 21.810
- 21.713
- 21.617
- 21.147

1qg-2-61. 10. f1d

Chemical structure of compound **3l** is shown as an inset. The structure is a biphenyl derivative with a benzyl ether group and a p-toluenesulfonyl group.

**1H NMR spectrum (CDCl<sub>3</sub>) data:**

| Chemical Shift (ppm)                                                                                                                                                                                                                                                                                                                                                                                                                                                                                                                                                                                                                                                                                                                                                                                                                                                                                                                                                                                                                                                                                                                                                                                                                                                                                                                                                                                                                                                                                                                                                                                                                                                                                                                                                                                                                                                                                                                                                                                                                                                                                                                                                                                                                                                                                                                                                                                                                                                                                                                                                                                                                                                                                                                                                                                                                                                                                                                                                                                                                                                                                                                                                                                                                                                                                                                                                                                                                                                                                                                                                                                                                                                                                                                                                                                                                                                                                                                                                                                                         | Integration |
|------------------------------------------------------------------------------------------------------------------------------------------------------------------------------------------------------------------------------------------------------------------------------------------------------------------------------------------------------------------------------------------------------------------------------------------------------------------------------------------------------------------------------------------------------------------------------------------------------------------------------------------------------------------------------------------------------------------------------------------------------------------------------------------------------------------------------------------------------------------------------------------------------------------------------------------------------------------------------------------------------------------------------------------------------------------------------------------------------------------------------------------------------------------------------------------------------------------------------------------------------------------------------------------------------------------------------------------------------------------------------------------------------------------------------------------------------------------------------------------------------------------------------------------------------------------------------------------------------------------------------------------------------------------------------------------------------------------------------------------------------------------------------------------------------------------------------------------------------------------------------------------------------------------------------------------------------------------------------------------------------------------------------------------------------------------------------------------------------------------------------------------------------------------------------------------------------------------------------------------------------------------------------------------------------------------------------------------------------------------------------------------------------------------------------------------------------------------------------------------------------------------------------------------------------------------------------------------------------------------------------------------------------------------------------------------------------------------------------------------------------------------------------------------------------------------------------------------------------------------------------------------------------------------------------------------------------------------------------------------------------------------------------------------------------------------------------------------------------------------------------------------------------------------------------------------------------------------------------------------------------------------------------------------------------------------------------------------------------------------------------------------------------------------------------------------------------------------------------------------------------------------------------------------------------------------------------------------------------------------------------------------------------------------------------------------------------------------------------------------------------------------------------------------------------------------------------------------------------------------------------------------------------------------------------------------------------------------------------------------------------------------------------|-------------|
| 7.514, 7.505, 7.499, 7.490, 7.486, 7.484, 7.479, 7.476, 7.469, 7.466, 7.462, 7.458, 7.454, 7.451, 7.447, 7.442, 7.438, 7.434, 7.430, 7.426, 7.422, 7.418, 7.414, 7.410, 7.406, 7.402, 7.398, 7.394, 7.390, 7.386, 7.382, 7.378, 7.374, 7.370, 7.366, 7.362, 7.358, 7.354, 7.350, 7.346, 7.342, 7.338, 7.334, 7.330, 7.326, 7.322, 7.318, 7.314, 7.310, 7.306, 7.302, 7.298, 7.294, 7.290, 7.286, 7.282, 7.278, 7.274, 7.270, 7.266, 7.262, 7.258, 7.254, 7.250, 7.246, 7.242, 7.238, 7.234, 7.230, 7.226, 7.222, 7.218, 7.214, 7.210, 7.206, 7.202, 7.198, 7.194, 7.190, 7.186, 7.182, 7.178, 7.174, 7.170, 7.166, 7.162, 7.158, 7.154, 7.150, 7.146, 7.142, 7.138, 7.134, 7.130, 7.126, 7.122, 7.118, 7.114, 7.110, 7.106, 7.102, 7.098, 7.094, 7.090, 7.086, 7.082, 7.078, 7.074, 7.070, 7.066, 7.062, 7.058, 7.054, 7.050, 7.046, 7.042, 7.038, 7.034, 7.030, 7.026, 7.022, 7.018, 7.014, 7.010, 7.006, 7.002, 6.998, 6.994, 6.990, 6.986, 6.982, 6.978, 6.974, 6.970, 6.966, 6.962, 6.958, 6.954, 6.950, 6.946, 6.942, 6.938, 6.934, 6.930, 6.926, 6.922, 6.918, 6.914, 6.910, 6.906, 6.902, 6.898, 6.894, 6.890, 6.886, 6.882, 6.878, 6.874, 6.870, 6.866, 6.862, 6.858, 6.854, 6.850, 6.846, 6.842, 6.838, 6.834, 6.830, 6.826, 6.822, 6.818, 6.814, 6.810, 6.806, 6.802, 6.798, 6.794, 6.790, 6.786, 6.782, 6.778, 6.774, 6.770, 6.766, 6.762, 6.758, 6.754, 6.750, 6.746, 6.742, 6.738, 6.734, 6.730, 6.726, 6.722, 6.718, 6.714, 6.710, 6.706, 6.702, 6.698, 6.694, 6.690, 6.686, 6.682, 6.678, 6.674, 6.670, 6.666, 6.662, 6.658, 6.654, 6.650, 6.646, 6.642, 6.638, 6.634, 6.630, 6.626, 6.622, 6.618, 6.614, 6.610, 6.606, 6.602, 6.598, 6.594, 6.590, 6.586, 6.582, 6.578, 6.574, 6.570, 6.566, 6.562, 6.558, 6.554, 6.550, 6.546, 6.542, 6.538, 6.534, 6.530, 6.526, 6.522, 6.518, 6.514, 6.510, 6.506, 6.502, 6.498, 6.494, 6.490, 6.486, 6.482, 6.478, 6.474, 6.470, 6.466, 6.462, 6.458, 6.454, 6.450, 6.446, 6.442, 6.438, 6.434, 6.430, 6.426, 6.422, 6.418, 6.414, 6.410, 6.406, 6.402, 6.398, 6.394, 6.390, 6.386, 6.382, 6.378, 6.374, 6.370, 6.366, 6.362, 6.358, 6.354, 6.350, 6.346, 6.342, 6.338, 6.334, 6.330, 6.326, 6.322, 6.318, 6.314, 6.310, 6.306, 6.302, 6.298, 6.294, 6.290, 6.286, 6.282, 6.278, 6.274, 6.270, 6.266, 6.262, 6.258, 6.254, 6.250, 6.246, 6.242, 6.238, 6.234, 6.230, 6.226, 6.222, 6.218, 6.214, 6.210, 6.206, 6.202, 6.198, 6.194, 6.190, 6.186, 6.182, 6.178, 6.174, 6.170, 6.166, 6.162, 6.158, 6.154, 6.150, 6.146, 6.142, 6.138, 6.134, 6.130, 6.126, 6.122, 6.118, 6.114, 6.110, 6.106, 6.102, 6.098, 6.094, 6.090, 6.086, 6.082, 6.078, 6.074, 6.070, 6.066, 6.062, 6.058, 6.054, 6.050, 6.046, 6.042, 6.038, 6.034, 6.030, 6.026, 6.022, 6.018, 6.014, 6.010, 6.006, 6.002, 5.998, 5.994, 5.990, 5.986, 5.982, 5.978, 5.974, 5.970, 5.966, 5.962, 5.958, 5.954, 5.950, 5.946, 5.942, 5.938, 5.934, 5.930, 5.926, 5.922, 5.918, 5.914, 5.910, 5.906, 5.902, 5.898, 5.894, 5.890, 5.886, 5.882, 5.878, 5.874, 5.870, 5.866, 5.862, 5.858, 5.854, 5.850, 5.846, 5.842, 5.838, 5.834, 5.830, 5.826, 5.822, 5.818, 5.814, 5.810, 5.806, 5.802, 5.798, 5.794, 5.790, 5.786, 5.782, 5.778, 5.774, 5.770, 5.766, 5.762, 5.758, 5.754, 5.750, 5.746, 5.742, 5.738, 5.734, 5.730, 5.726, 5.722, 5.718, 5.714, 5.710, 5.706, 5.702, 5.698, 5.694, 5.690, 5.686, 5.682, 5.678, 5.674, 5.670, 5.666, 5.662, 5.658, 5.654, 5.650, 5.646, 5.642, 5.638, 5.634, 5.630, 5.626, 5.622, 5.618, 5.614, 5.610, 5.606, 5.602, 5.598, 5.594, 5.590, 5.586, 5.582, 5.578, 5.574, 5.570, 5.566, 5.562, 5.558, 5.554, 5.550, 5.546, 5.542, 5.538, 5.534, 5.530, 5.526, 5.522, 5.518, 5.514, 5.510, 5.506, 5.502, 5.498, 5.494, 5.490, 5.486, 5.482, 5.478, 5.474, 5.470, 5.466, 5.462, 5.458, 5.454, 5.450, 5.446, 5.442, 5.438, 5.434, 5.430, 5.426, 5.422, 5.418, 5.414, 5.410, 5.406, 5.402, 5.398, 5.394, 5.390, 5.386, 5.382, 5.378, 5.374, 5.370, 5.366, 5.362, 5.358, 5.354, 5.350, 5.346, 5.342, 5.338, 5.334, 5.330, 5.326, 5.322, 5.318, 5.314, 5.310, 5.306, 5.302, 5.298, 5.29 |             |

lqg-2-61-1.13.fid

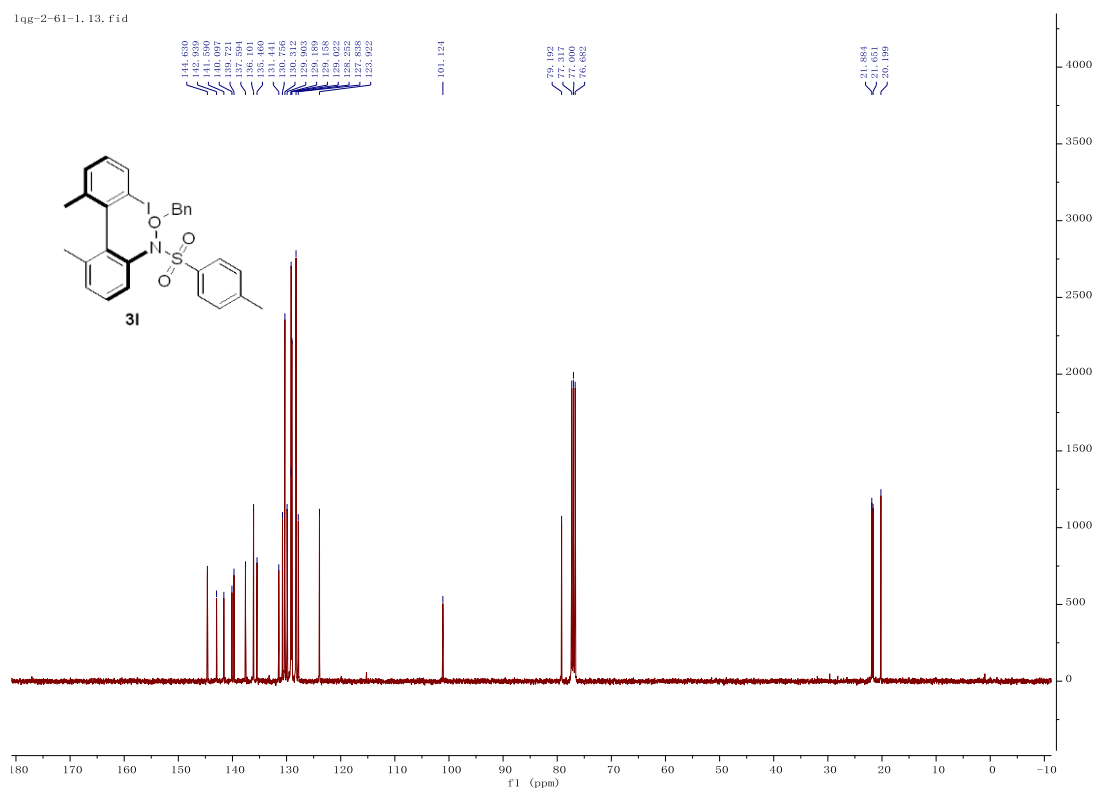

lqg2-139-2-ee.10.fid

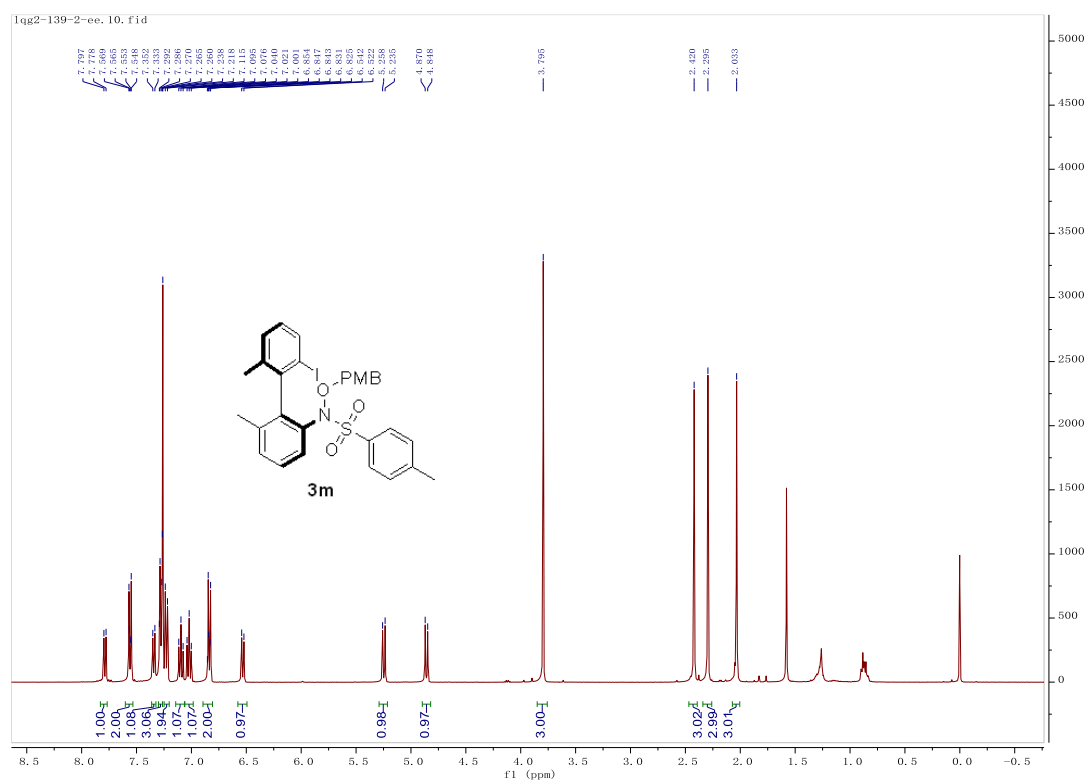

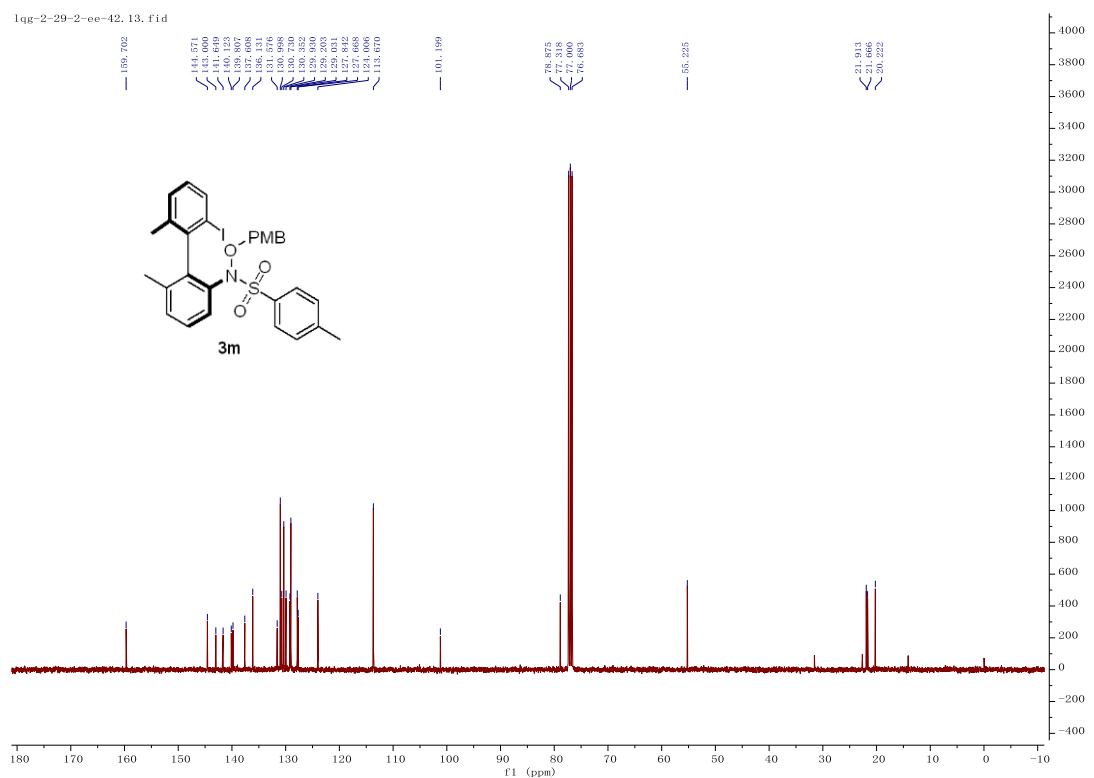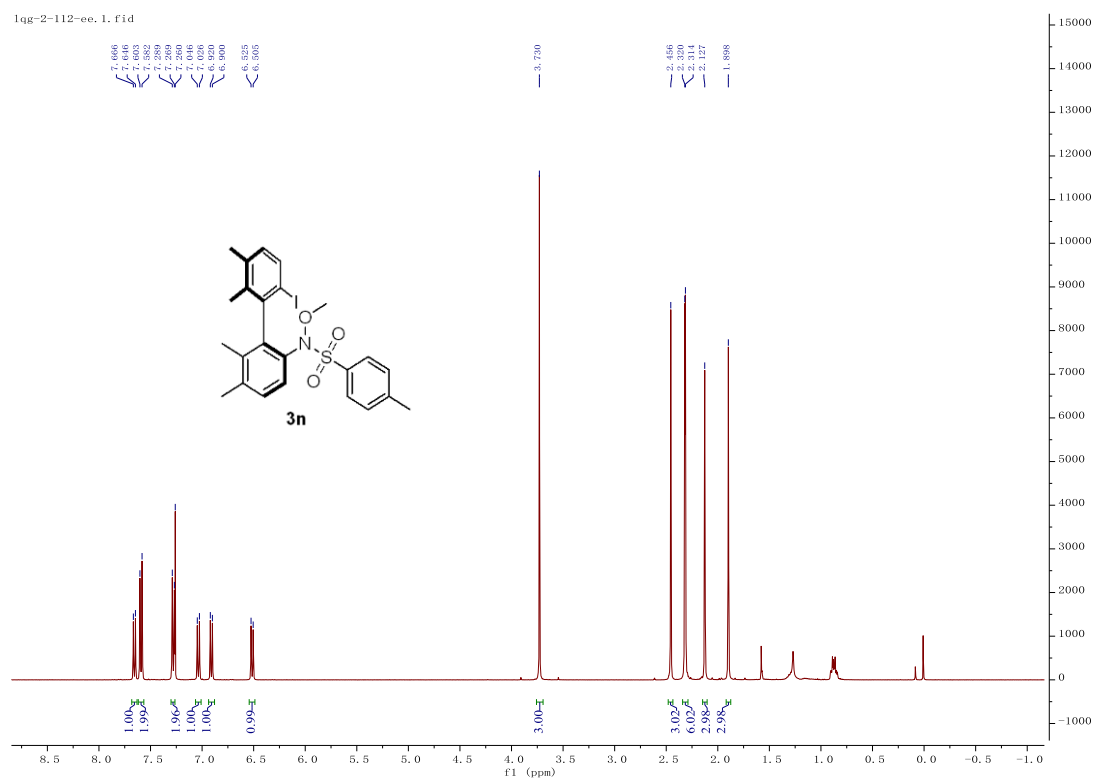



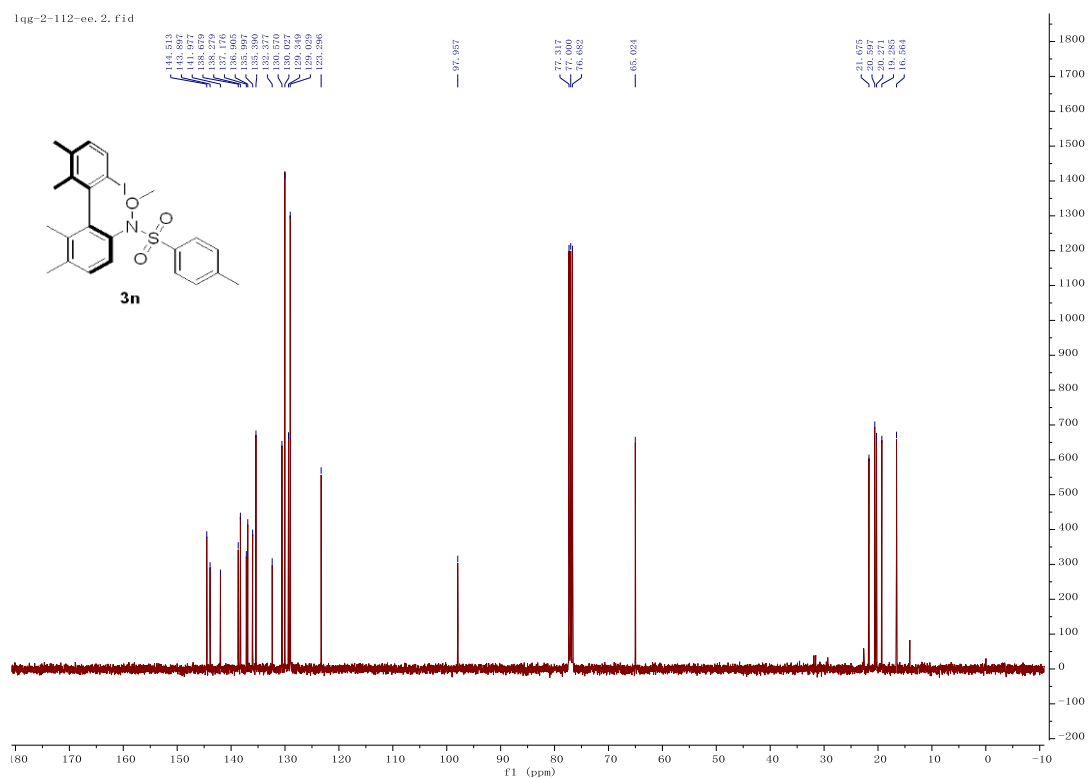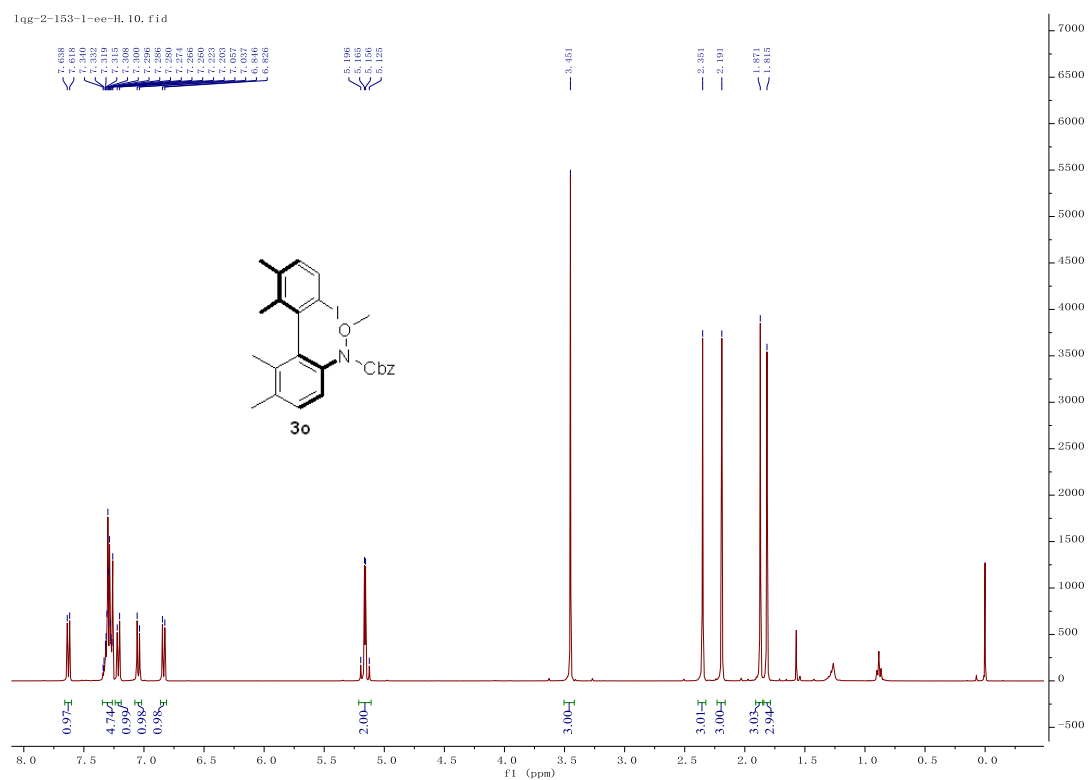



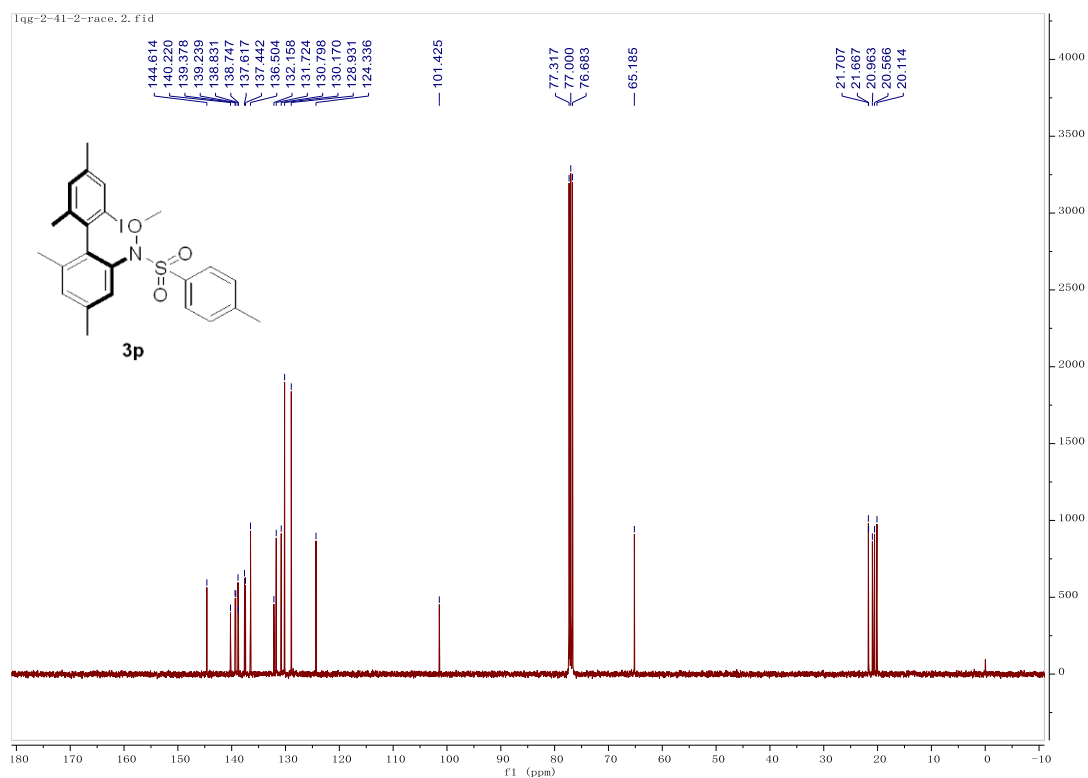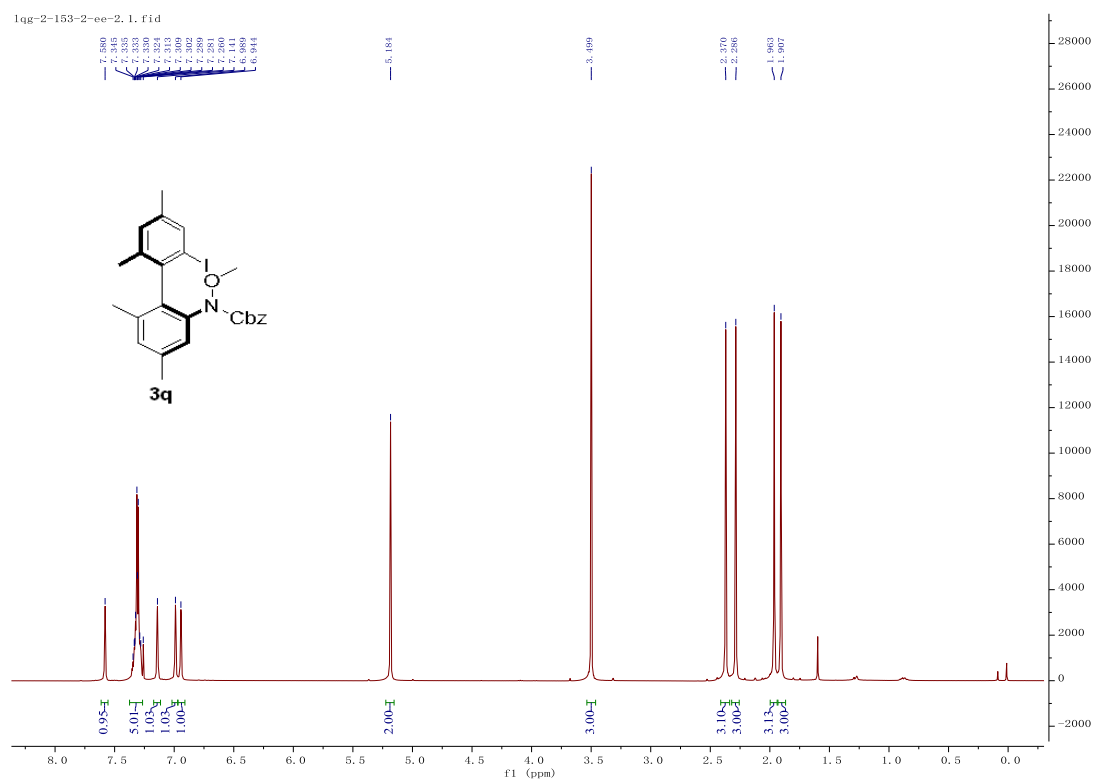

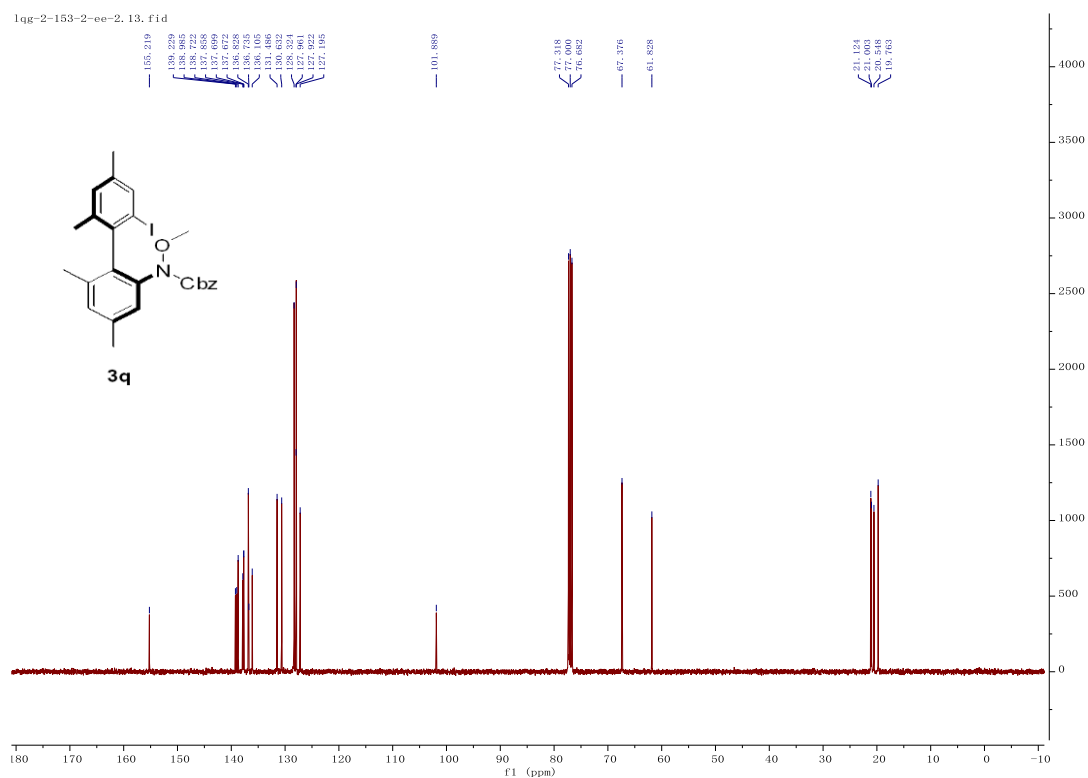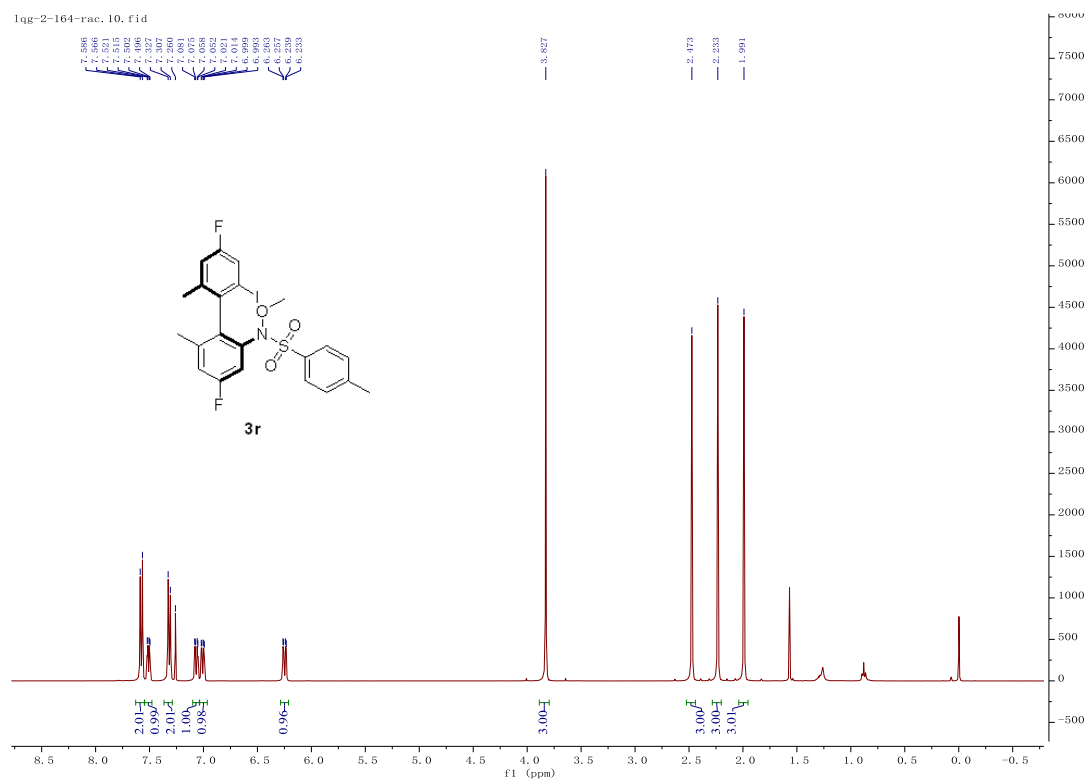

lqg-2-164-rac. 11. fid

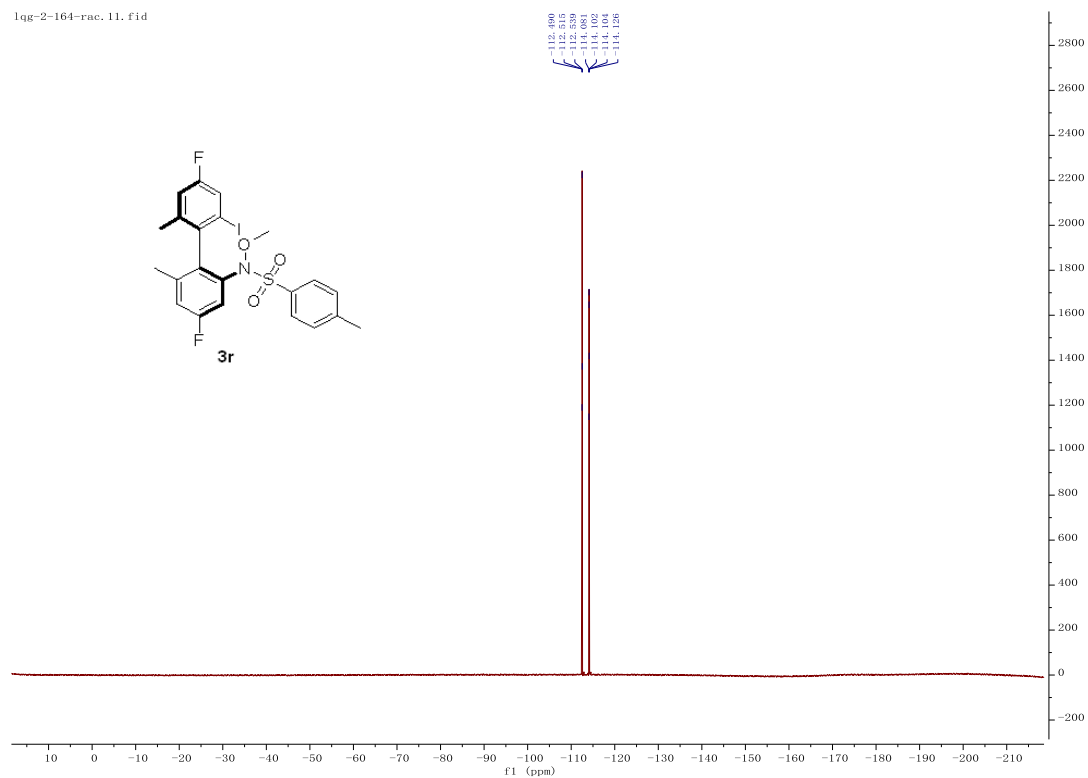

lqg-2-164-rac-60. 13. fid

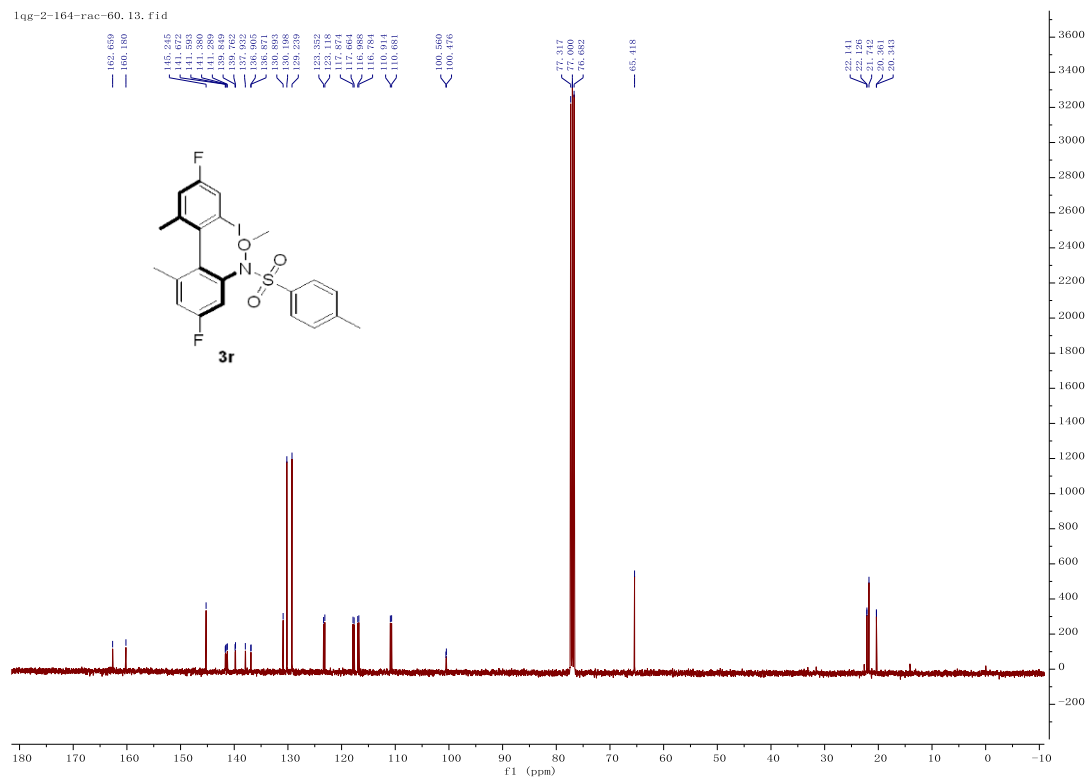

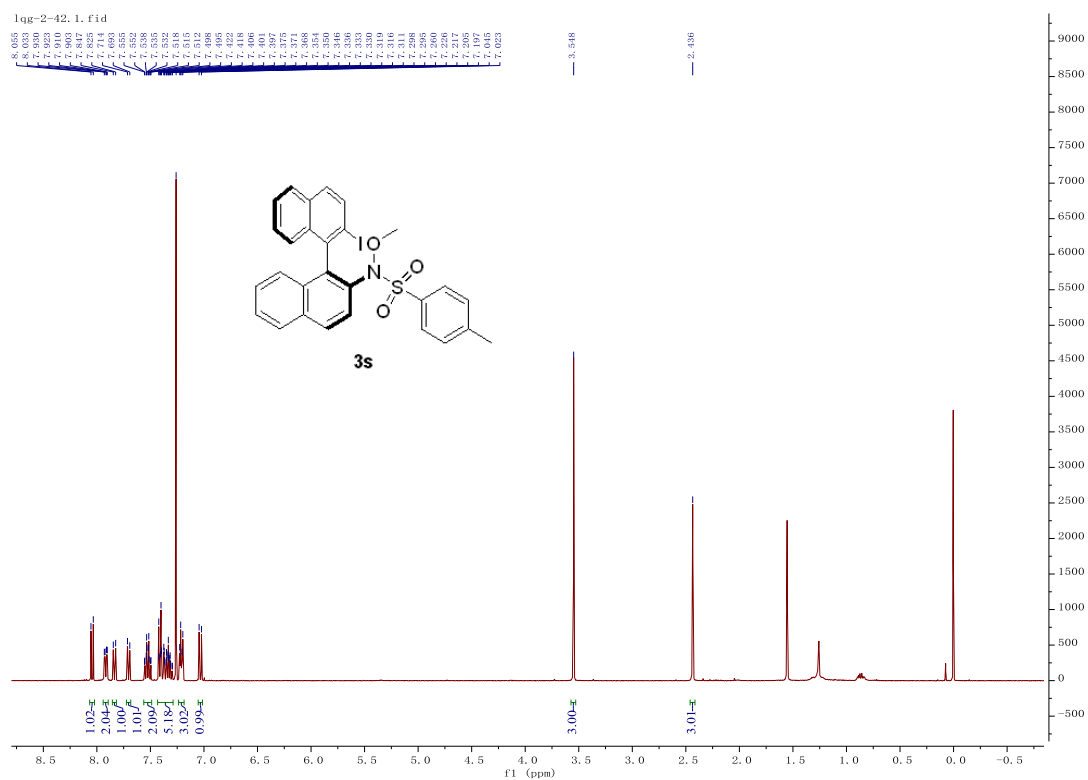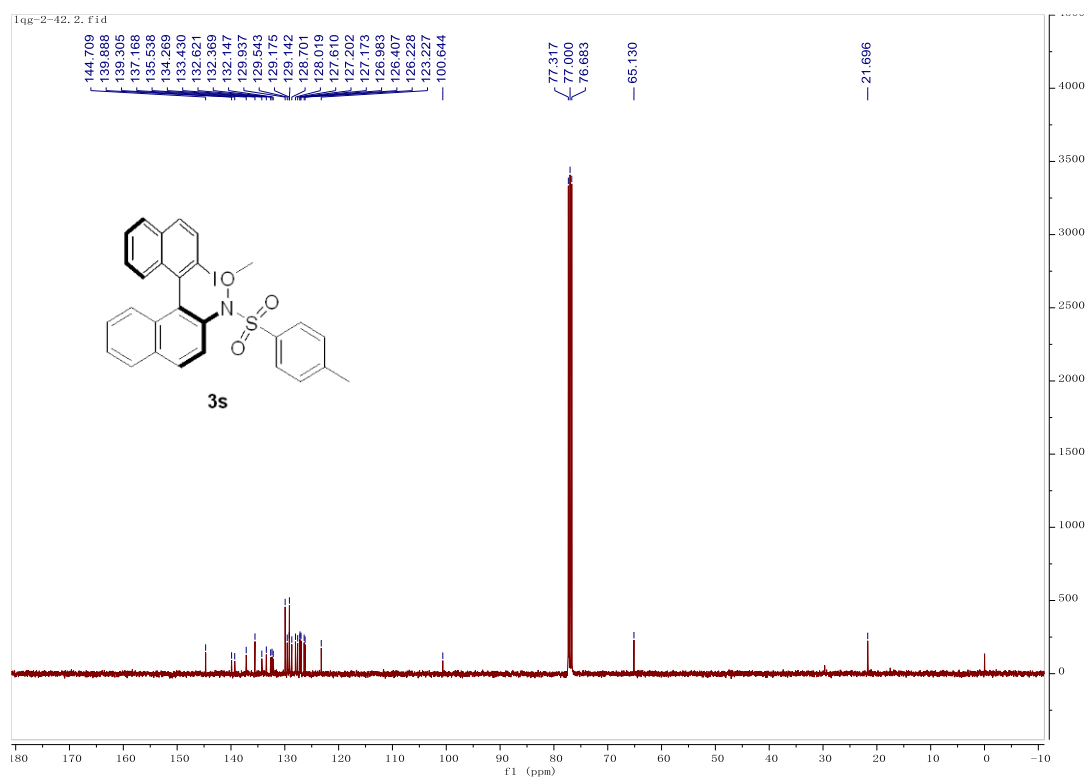

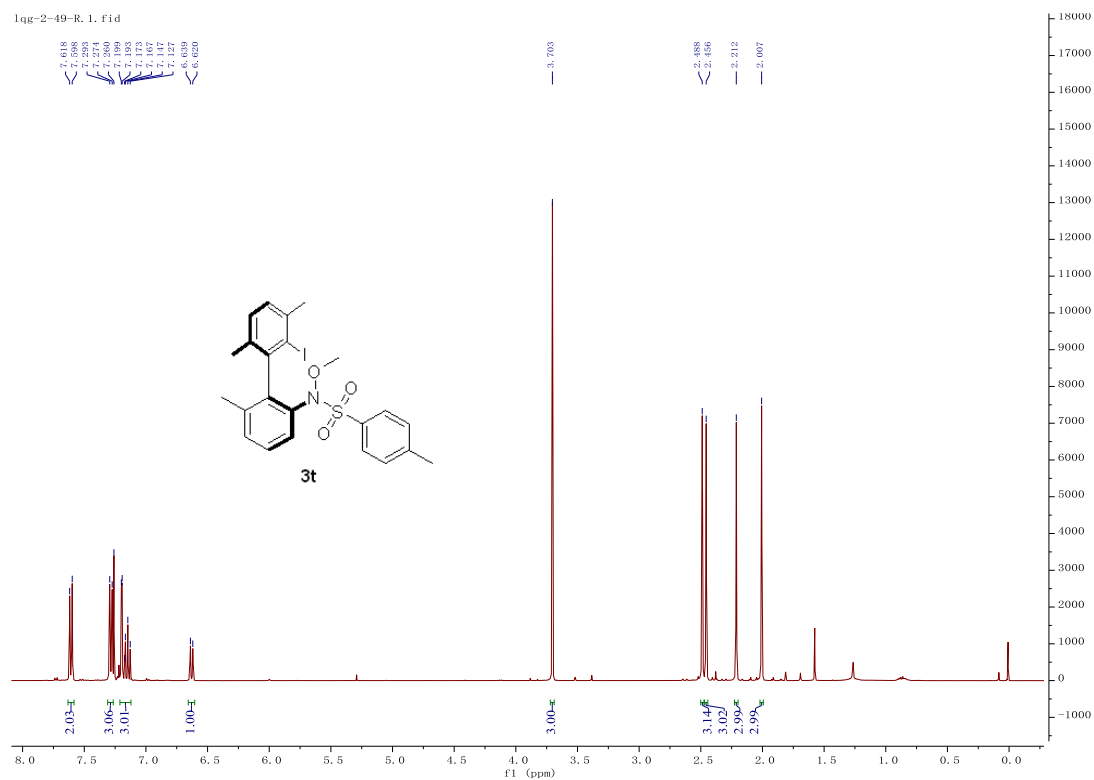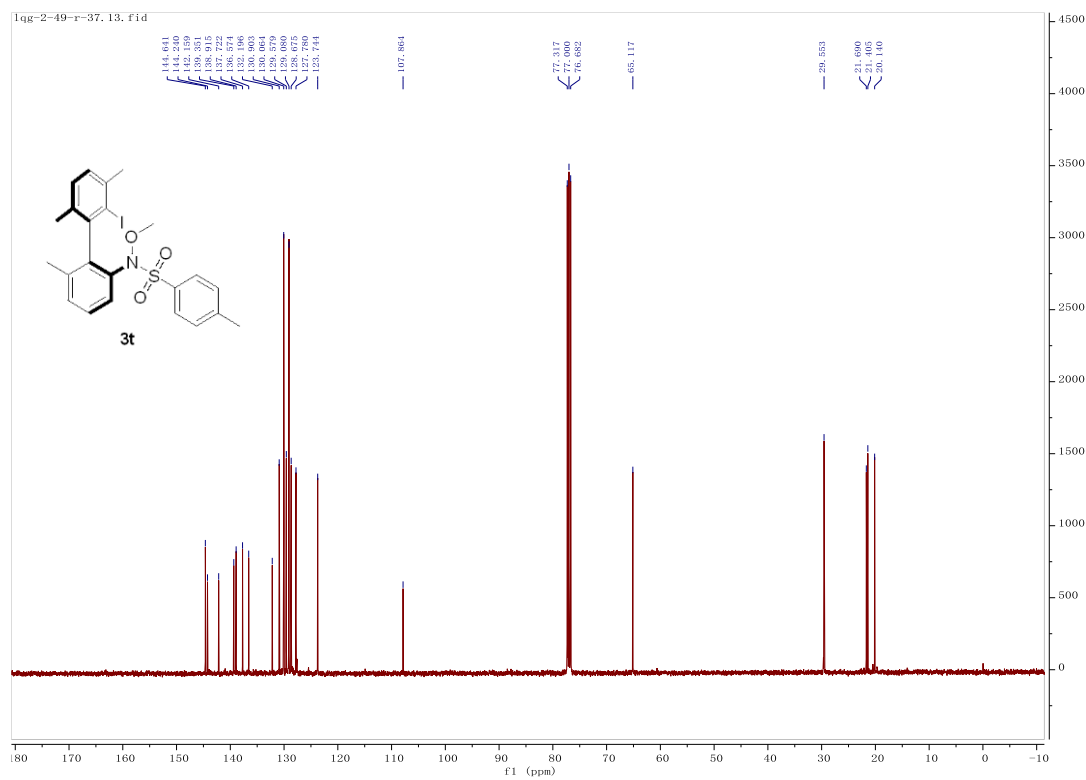

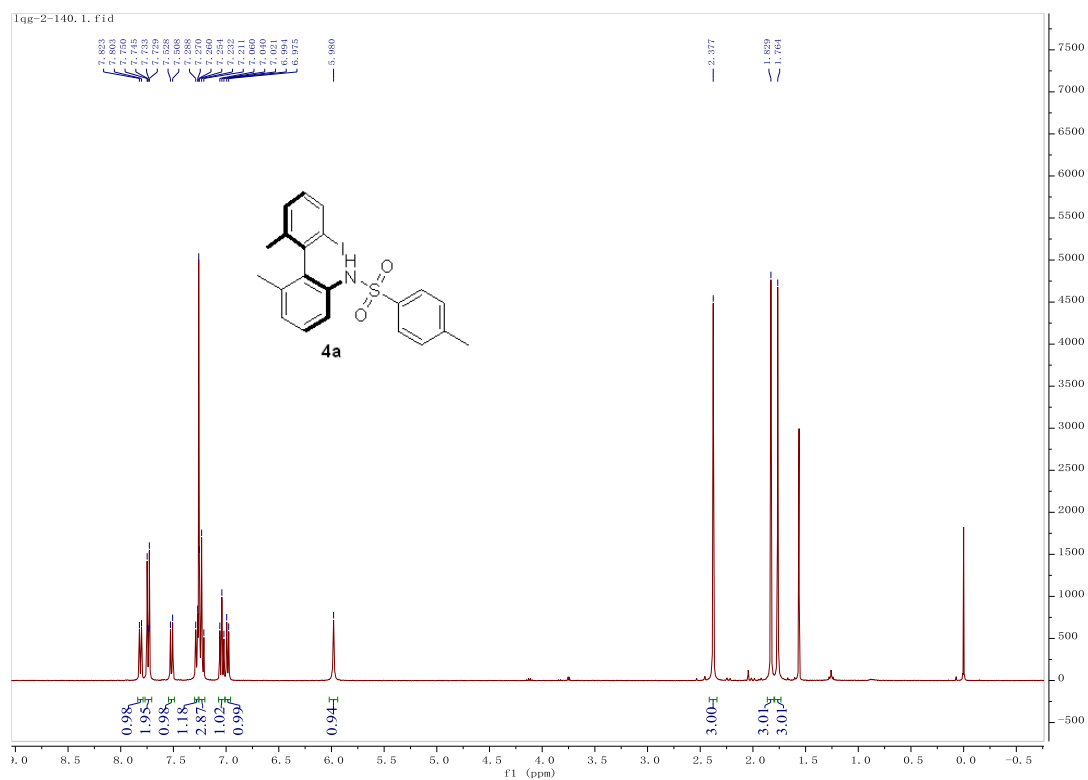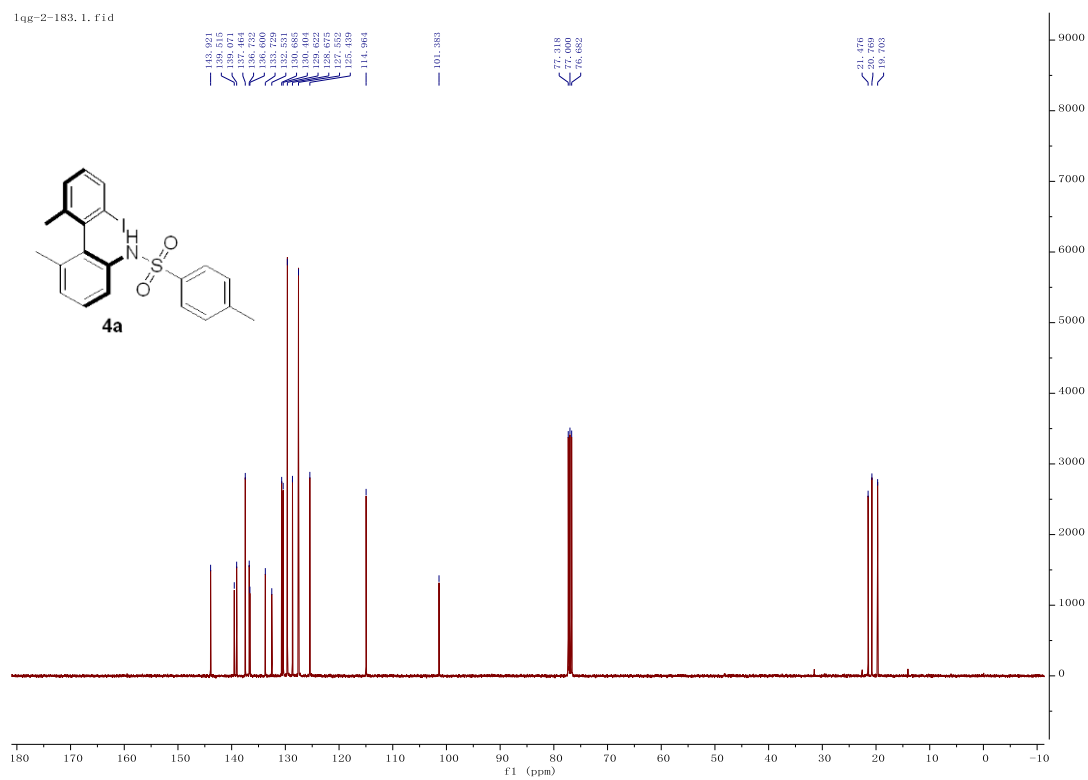



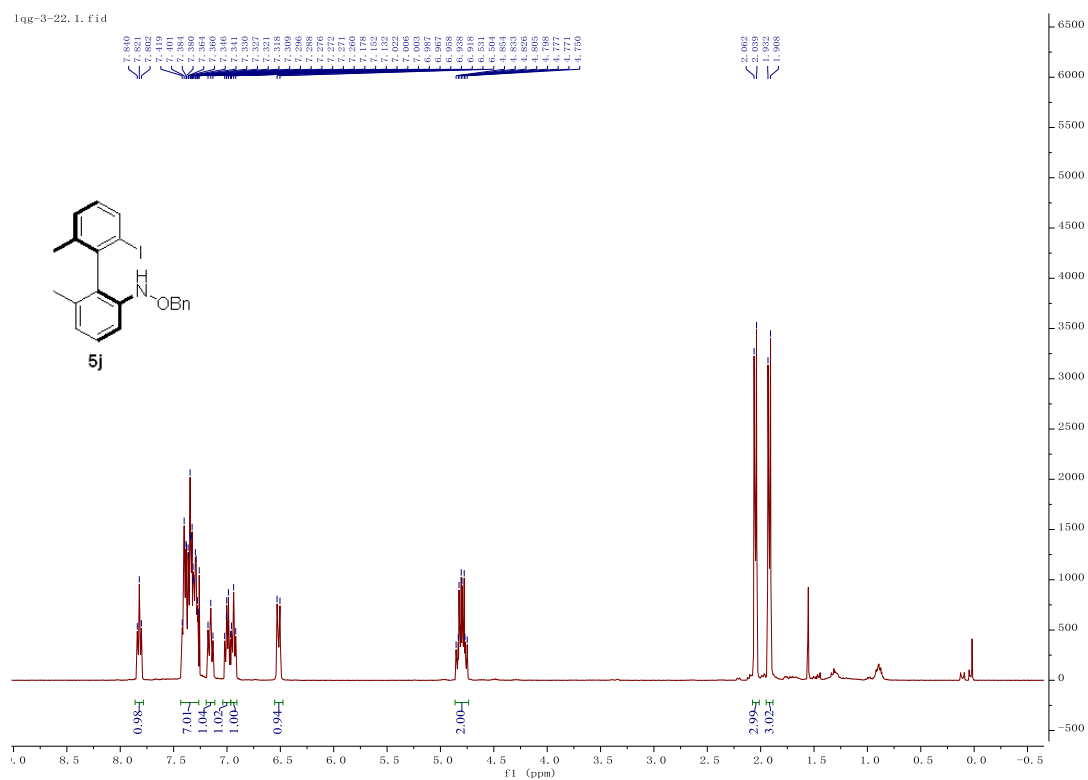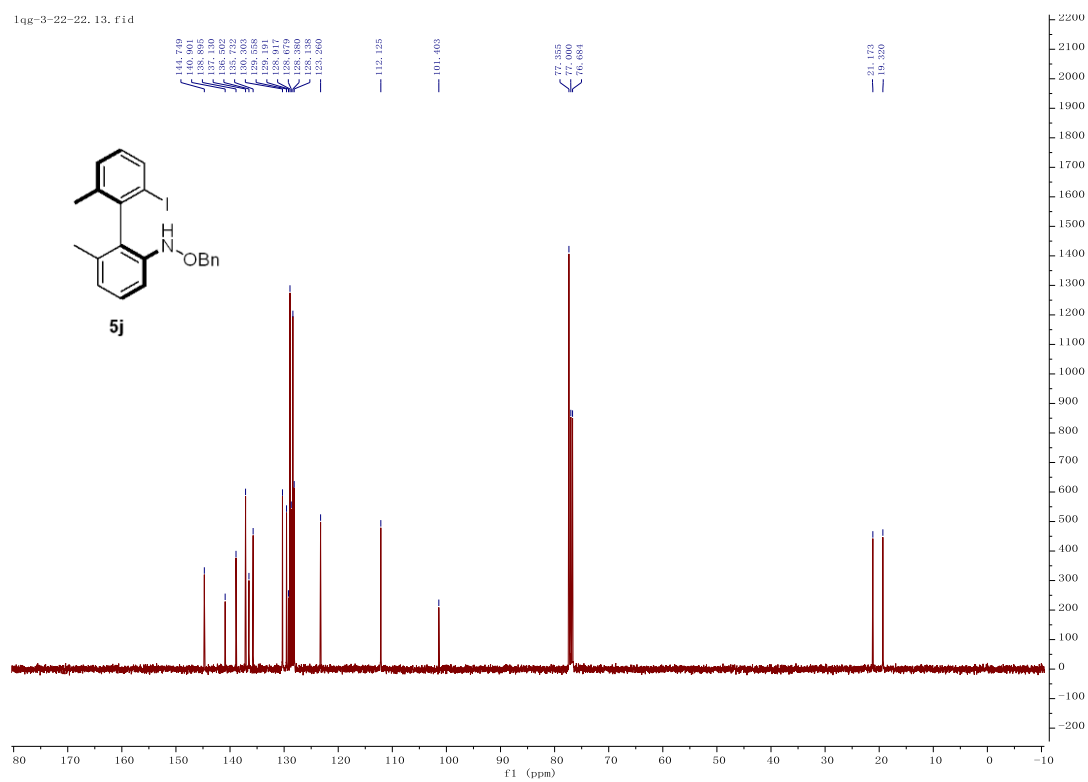

1qg-3-18-p2. 1. fid

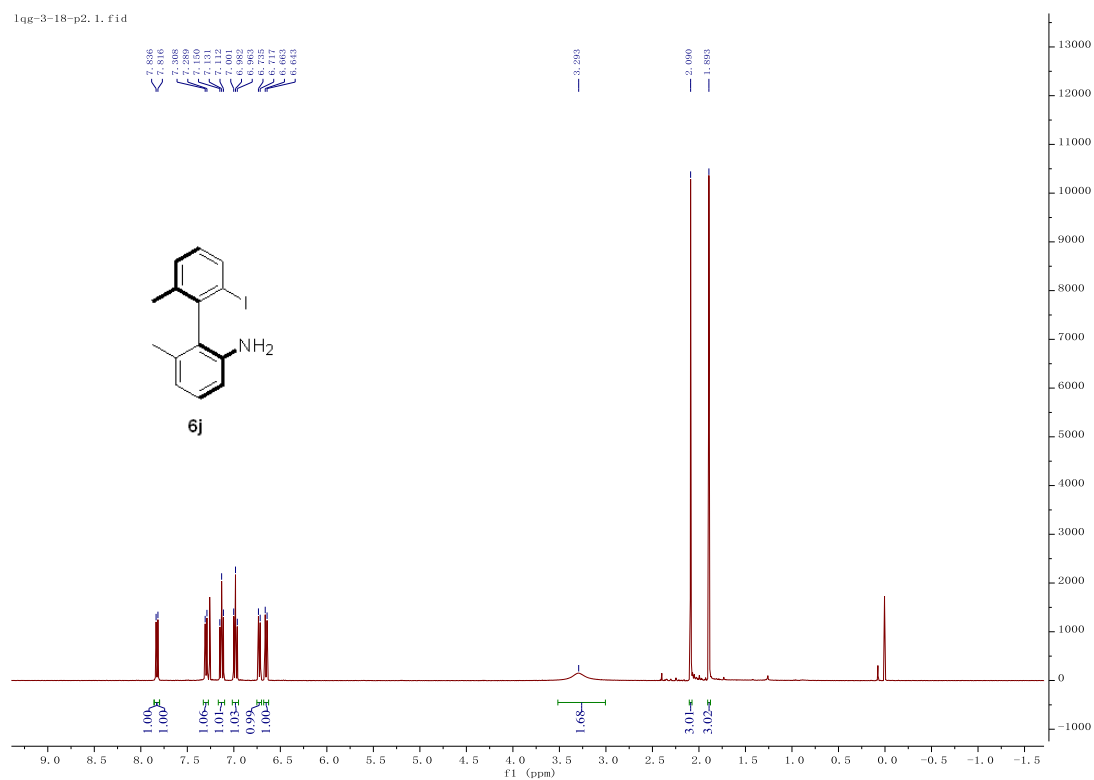

1qg-3-18-p2-21. 13. fid

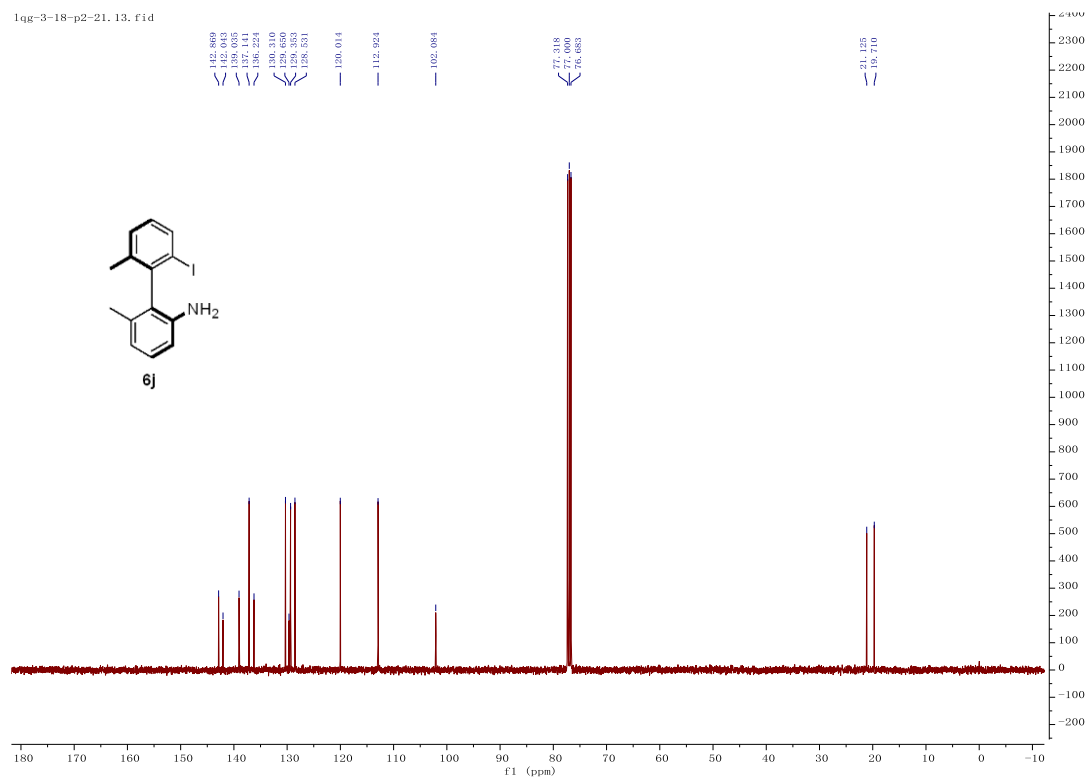

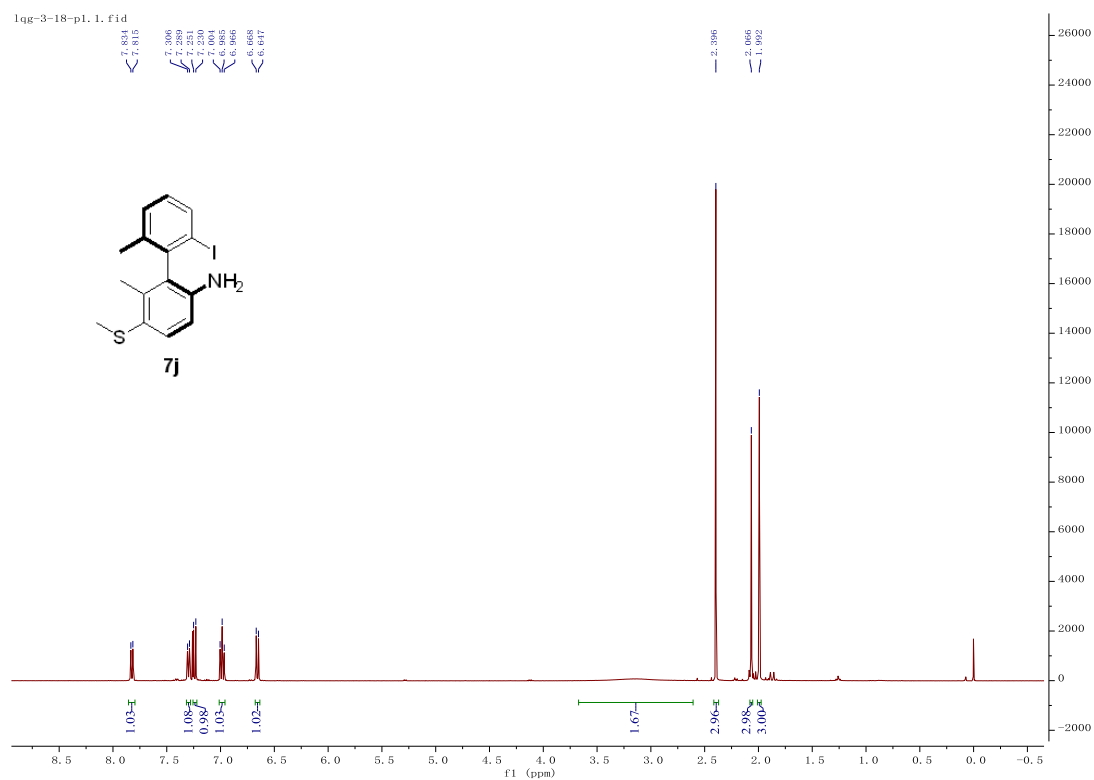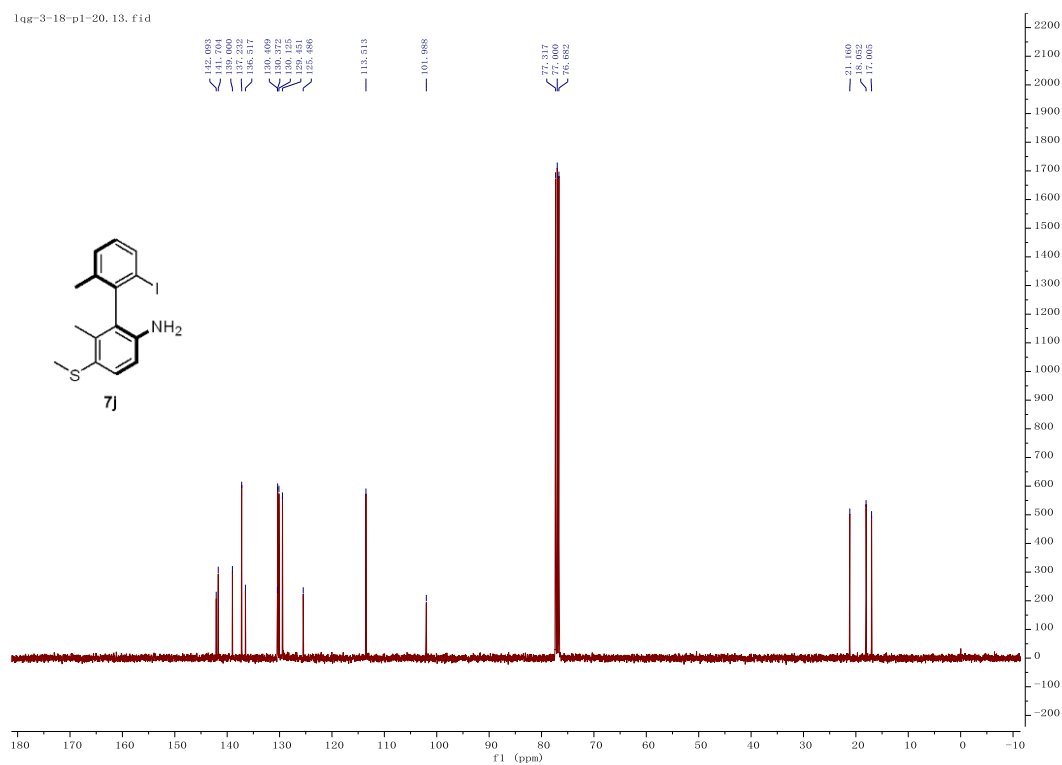

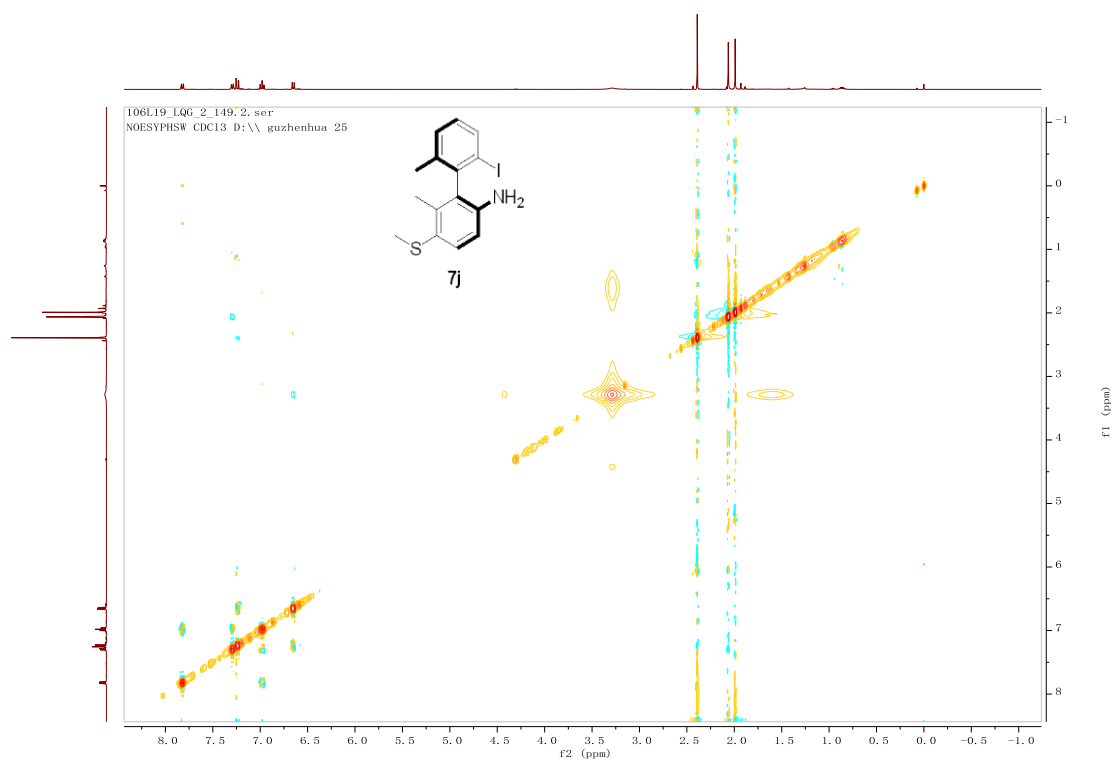

## Copies of HPLC Traces

Data File F:\DATA\LQG\DATA\LQG-1-169-1(AD,5%,1.0,RACE).D  
Sample Name: LQG-1-169-1(AD,5%,1.0,RACE)

```
=====
Acq. Operator   : SYSTEM
Sample Operator : SYSTEM
Acq. Instrument : LC1260                      Location : 1
Injection Date  : 07/12/2018 22:23:32        Inj Volume : No inj

Acq. Method     : F:\METHOD\ZK.M
Last changed    : 07/12/2018 22:16:34 by SYSTEM
                  (modified after loading)
Analysis Method : C:\Chem32\1\Methods\DEF_LC.M
Last changed    : 13/02/2014 23:27:44 by SYSTEM
Additional Info  : Peak(s) manually integrated
=====
```

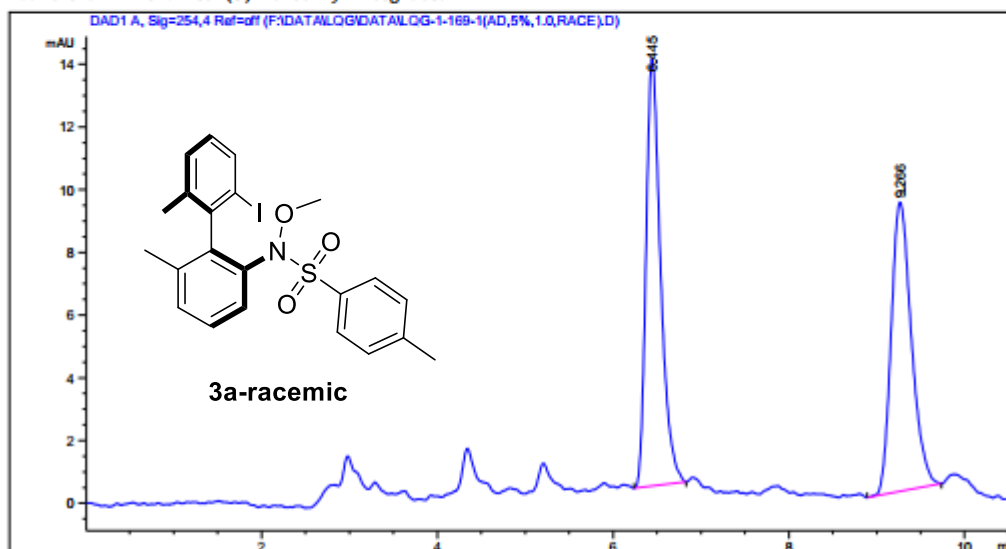

### Area Percent Report

```
Sorted By      : Signal
Multiplier     : 1.0000
Dilution       : 1.0000
Use Multiplier & Dilution Factor with ISTDs
```

Signal 1: DAD1 A, Sig=254,4 Ref=off

| Peak # | RetTime [min] | Type | Width [min] | Area [mAU*s] | Height [mAU] | Area %  |
|--------|---------------|------|-------------|--------------|--------------|---------|
| 1      | 6.445         | BB   | 0.1759      | 156.41916    | 13.62501     | 51.4834 |
| 2      | 9.266         | BB   | 0.2406      | 147.40503    | 9.21721      | 48.5166 |

Totals : 303.82419 22.84222

Sample Name: LQG-1-169-1(AD,5%,1.0,ee)

=====

Acq. Operator : SYSTEM

Location : 1

Injection Date : 07/12/2018 22:37:35

Acq. Method : ZK.M

Analysis Method : C:\Chem32\1\Methods\DEF\_LC.M

Last changed : 13/02/2014 23:27:44 by SYSTEM

Additional Info : Peak(s) manually integrated

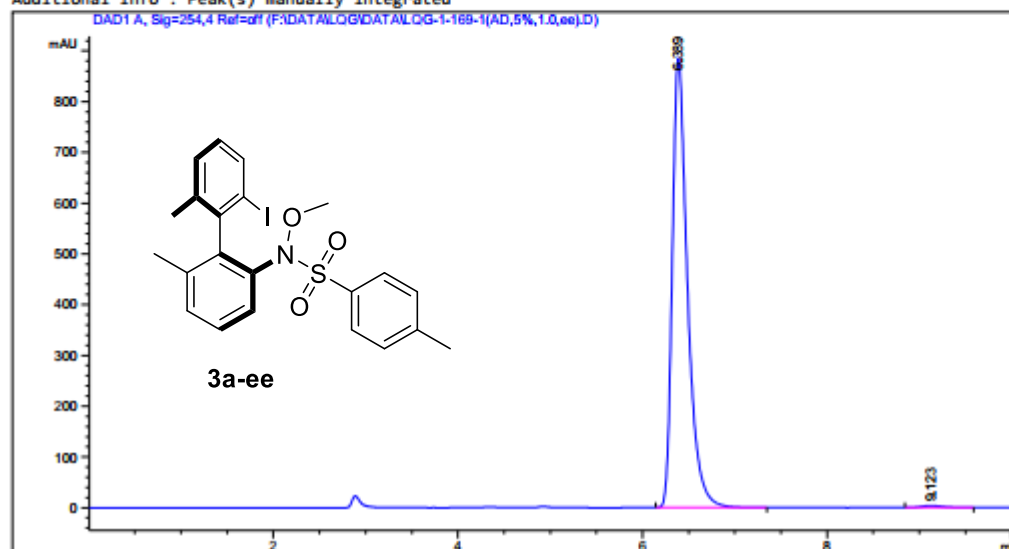

## =====

## Area Percent Report

Sorted By : Signal  
Multiplier : 1.0000  
Dilution : 1.0000  
Use Multiplier & Dilution Factor with ISTDs

Signal 1: DAD1 A, Sig=254,4 Ref=off

| Peak # | RetTime [min] | Type | Width [min] | Area [mAU*s] | Height [mAU] | Area %  |
|--------|---------------|------|-------------|--------------|--------------|---------|
| 1      | 6.389         | BB   | 0.1715      | 1.01269e4    | 885.00714    | 99.4163 |
| 2      | 9.123         | BB   | 0.2299      | 59.45290     | 3.81313      | 0.5837  |

Totals : 1.01863e4 888.82027

=====

\*\*\* End of Report \*\*\*

### <Sample Information>

Sample Name : lqg-2-104-1(AD,5%,1.0,race)  
Sample ID :  
Data Filename : lqg-2-104-1(AD,5%,1.0,race).lcd  
Method Filename : LCY single.lcm  
Batch Filename :  
Vial # : 1-1  
Injection Volume : 15 uL  
Date Acquired : 5/2/2019 4:16:48 AM  
Date Processed : 5/2/2019 4:29:12 AM

Sample Type : Unknown  
Acquired by : System Administrator  
Processed by : System Administrator

### <Chromatogram>

mV

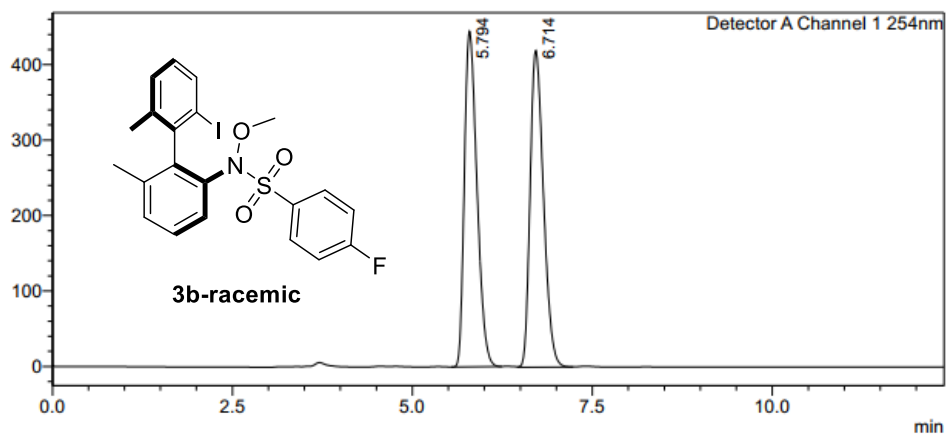

### <Peak Table>

Detector A Channel 1 254nm

| Peak# | Ret. Time | Area     | Height | Conc.  | Unit | Mark | Name |
|-------|-----------|----------|--------|--------|------|------|------|
| 1     | 5.794     | 5392930  | 444498 | 49.883 |      | M    |      |
| 2     | 6.714     | 5418155  | 419538 | 50.117 |      |      |      |
| Total |           | 10811085 | 864036 |        |      |      |      |

### <Sample Information>

Sample Name : lqg-2-104-1(AD,5%,1.0,ee)  
Sample ID :  
Data Filename : lqg-2-104-1(AD,5%,1.0,ee).lcd  
Method Filename : LCY single.lcm  
Batch Filename :  
Vial # : 1-1  
Injection Volume : 15 uL  
Date Acquired : 5/2/2019 4:31:45 AM  
Date Processed : 5/2/2019 4:39:39 AM

Sample Type : Unknown  
Acquired by : System Administrator  
Processed by : System Administrator

### <Chromatogram>

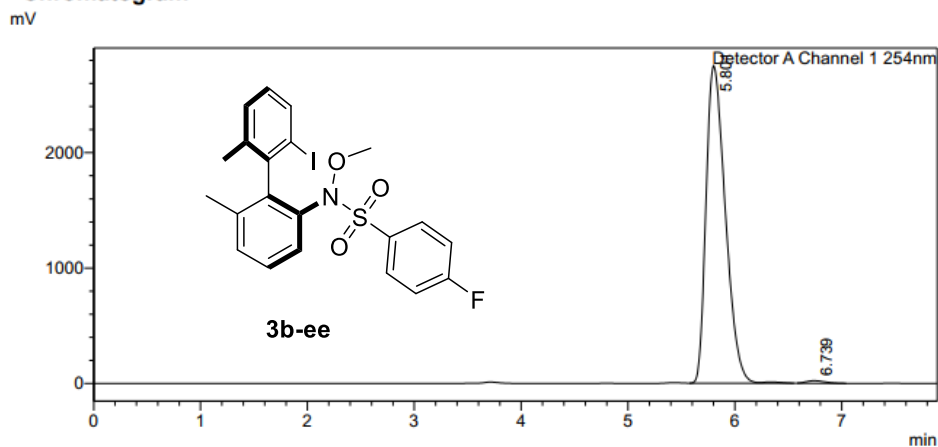

### <Peak Table>

Detector A Channel 1 254nm

| Peak# | Ret. Time | Area     | Height  | Conc.  | Unit | Mark | Name |
|-------|-----------|----------|---------|--------|------|------|------|
| 1     | 5.801     | 34578484 | 2749713 | 99.252 |      | M    |      |
| 2     | 6.739     | 260493   | 21855   | 0.748  |      | M    |      |
| Total |           | 34838977 | 2771569 |        |      |      |      |



### <Sample Information>

Sample Name : lqg-2-110(AD,5%,1.0,race)  
Sample ID :  
Data Filename : lqg-2-110(AD,5%,1.0,race).lcd  
Method Filename : GWJ single.lcm  
Batch Filename :  
Vial # : 1-1  
Injection Volume : 15 uL  
Date Acquired : 5/3/2019 12:34:05 AM  
Date Processed : 5/3/2019 12:53:14 AM

Sample Type : Unknown  
Acquired by : System Administrator  
Processed by : System Administrator

### <Chromatogram>

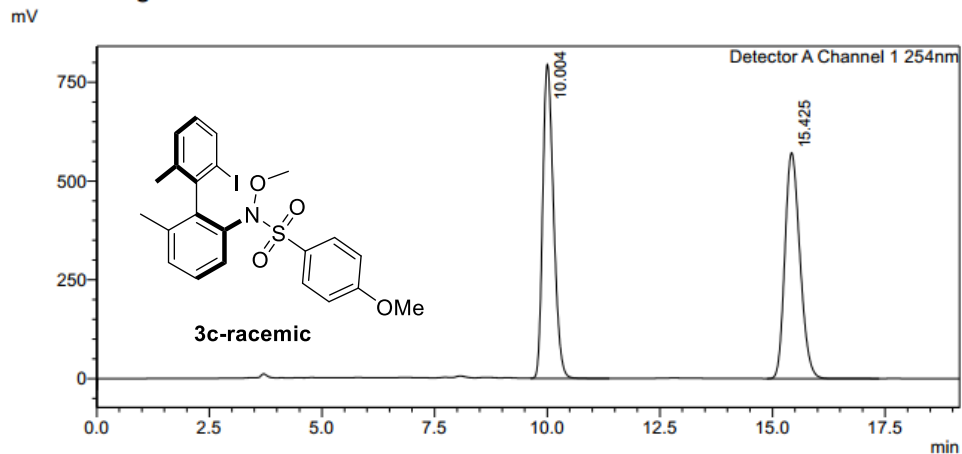

### <Peak Table>

Detector A Channel 1 254nm

| Peak# | Ret. Time | Area     | Height  | Conc.  | Unit | Mark | Name |
|-------|-----------|----------|---------|--------|------|------|------|
| 1     | 10.004    | 13295279 | 794421  | 49.983 |      | S    |      |
| 2     | 15.425    | 13304399 | 571315  | 50.017 |      |      |      |
| Total |           | 26599678 | 1365735 |        |      |      |      |

### <Sample Information>

Sample Name : lqg-2-110(AD,5%,1.0,ee)  
Sample ID :  
Data Filename : lqg-2-110(AD,5%,1.0,ee).lcd  
Method Filename : GWJ single.lcm  
Batch Filename :  
Vial # : 1-1  
Injection Volume : 15 uL  
Date Acquired : 5/3/2019 12:59:48 AM  
Date Processed : 5/3/2019 1:18:12 AM

Sample Type : Unknown  
Acquired by : System Administrator  
Processed by : System Administrator

### <Chromatogram>

mV

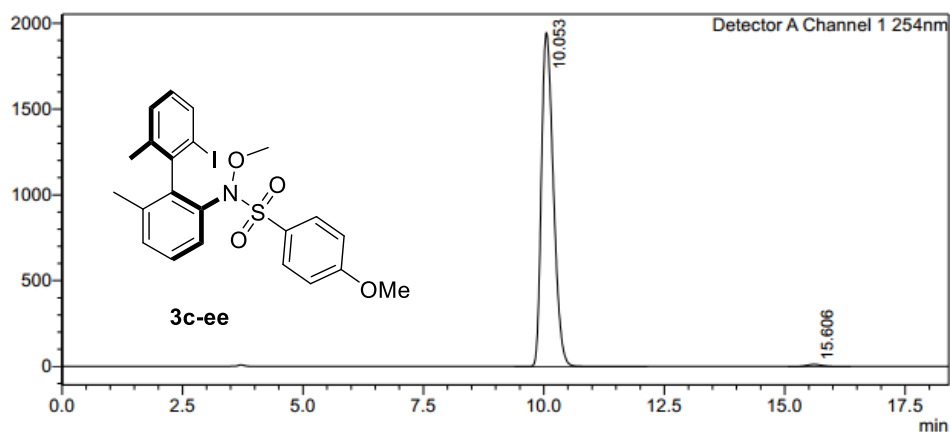

### <Peak Table>

Detector A Channel 1 254nm

| Peak# | Ret. Time | Area     | Height  | Conc.  | Unit | Mark | Name |
|-------|-----------|----------|---------|--------|------|------|------|
| 1     | 10.053    | 33550443 | 1944005 | 99.227 |      | S M  |      |
| 2     | 15.606    | 261243   | 11496   | 0.773  |      |      |      |
| Total |           | 33811685 | 1955501 |        |      |      |      |

### <Sample Information>

Sample Name : LQG-2-51-2(AD,5%,1.0, race)  
Sample ID :  
Data Filename : LQG-2-51-2(AD,5%,1.0, race).lcd  
Method Filename : GWJ single.lcm  
Batch Filename :  
Vial # : 1-1  
Injection Volume : 15 uL  
Date Acquired : 4/16/2019 10:34:45 PM  
Date Processed : 4/16/2019 10:44:23 PM

Sample Type : Unknown  
Acquired by : System Administrator  
Processed by : System Administrator

### <Chromatogram>

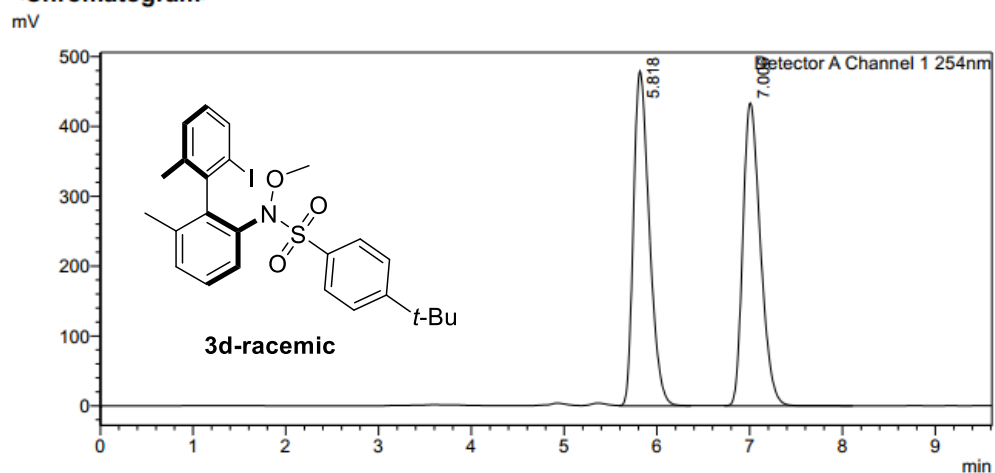

### <Peak Table>

Detector A Channel 1 254nm

| Peak# | Ret. Time | Area     | Height | Conc.  | Unit | Mark | Name |
|-------|-----------|----------|--------|--------|------|------|------|
| 1     | 5.818     | 5684225  | 479095 | 49.940 |      |      |      |
| 2     | 7.006     | 5697828  | 433539 | 50.060 |      |      |      |
| Total |           | 11382053 | 912634 |        |      |      |      |

### <Sample Information>

Sample Name : LQG-2-51-2 (2)(AD,5%,1.0,ee)  
Sample ID :  
Data Filename : LQG-2-51-2 (2)(AD,5%,1.0,ee).lcd  
Method Filename : GWJ single.lcm  
Batch Filename :  
Vial # : 1-1  
Injection Volume : 15 uL  
Date Acquired : 4/16/2019 10:49:41 PM  
Date Processed : 4/16/2019 10:57:44 PM

Sample Type : Unknown  
Acquired by : System Administrator  
Processed by : System Administrator

### <Chromatogram>

mV

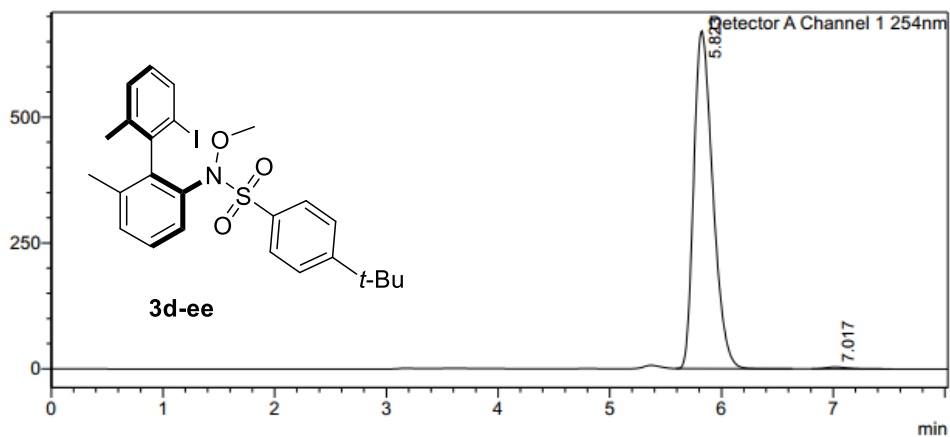

### <Peak Table>

Detector A Channel 1 254nm

| Peak# | Ret. Time | Area    | Height | Conc.  | Unit | Mark | Name |
|-------|-----------|---------|--------|--------|------|------|------|
| 1     | 5.823     | 7953873 | 670757 | 99.422 |      | M    |      |
| 2     | 7.017     | 46271   | 3632   | 0.578  |      | M    |      |
| Total |           | 8000144 | 674389 |        |      |      |      |

Sample Name: lqg-1-151-1(AD,5%,1.0,RACE)

=====

Acq. Operator : SYSTEM

Location : 1

Injection Date : 09/10/2018 21:23:36

Acq. Method : rxdeng.M

Analysis Method : C:\Chem32\1\Methods\DEF\_LC.M

Last changed : 13/02/2014 23:27:44 by SYSTEM

Additional Info : Peak(s) manually integrated

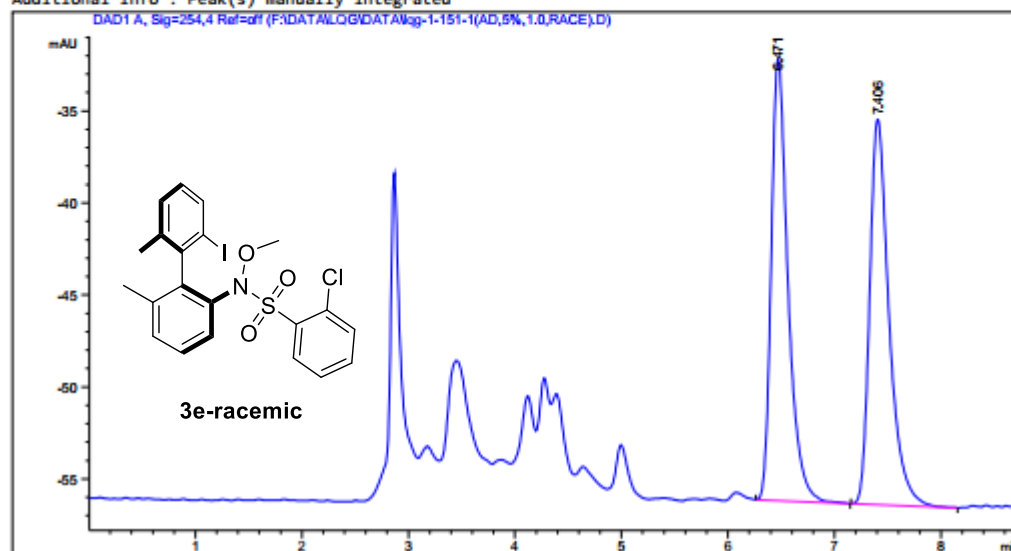

## =====

## Area Percent Report

Sorted By : Signal  
Multiplier : 1.0000  
Dilution : 1.0000  
Use Multiplier & Dilution Factor with ISTDs

Signal 1: DAD1 A, Sig=254,4 Ref=off

| Peak # | RetTime [min] | Type | Width [min] | Area [mAU*s] | Height [mAU] | Area %  |
|--------|---------------|------|-------------|--------------|--------------|---------|
| 1      | 6.471         | BB   | 0.1635      | 262.93973    | 24.05271     | 49.8812 |
| 2      | 7.406         | BB   | 0.1891      | 264.19220    | 20.95713     | 50.1188 |

Totals : 527.13193 45.00984

=====

\*\*\* End of Report \*\*\*

Data File F:\DATA\LQG\DATA\LQG-2-56-3(AD,5%,1.0,ee).D  
Sample Name: LQG-2-56-3(AD,5%,1.0,ee)

=====

Acq. Operator : SYSTEM

Location : 1

Injection Date : 11/04/2019 19:58:24

Acq. Method : LQG.M

Analysis Method : C:\Chem32\1\Methods\DEF\_LC.M

Last changed : 13/02/2014 23:27:44 by SYSTEM

Additional Info : Peak(s) manually integrated

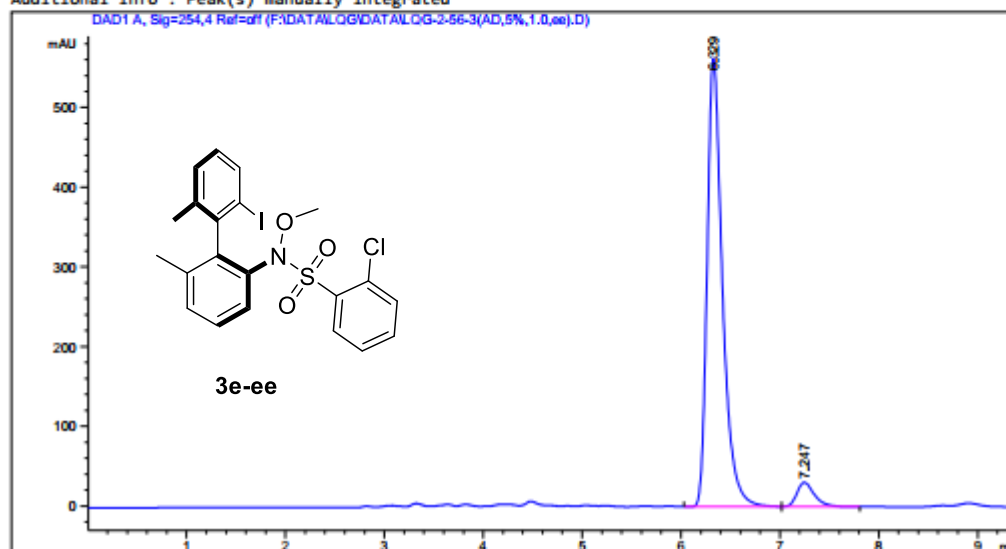

=====

Area Percent Report

=====

Sorted By : Signal  
Multiplier : 1.0000  
Dilution : 1.0000  
Use Multiplier & Dilution Factor with ISTDs

Signal 1: DAD1 A, Sig=254,4 Ref=off

| Peak # | RetTime [min] | Type | Width [min] | Area [mAU*s] | Height [mAU] | Area %  |
|--------|---------------|------|-------------|--------------|--------------|---------|
| 1      | 6.329         | BV   | 0.1615      | 6054.99707   | 562.74353    | 94.1444 |
| 2      | 7.247         | VB   | 0.1859      | 376.60693    | 30.53773     | 5.8556  |

Totals : 6431.60400 593.28126

=====

\*\*\* End of Report \*\*\*

### <Sample Information>

Sample Name : LQG-2-99(AD-5%, 1.0,race)  
Sample ID :  
Data Filename : LQG-2-99(AD-5%, 1.0,race).lcd  
Method Filename : GWJ single.lcm  
Batch Filename :  
Vial # : 1-1  
Injection Volume : 15 uL  
Date Acquired : 4/28/2019 3:58:10 PM  
Date Processed : 4/28/2019 4:57:55 PM

Sample Type : Unknown  
Acquired by : System Administrator  
Processed by : System Administrator

### <Chromatogram>

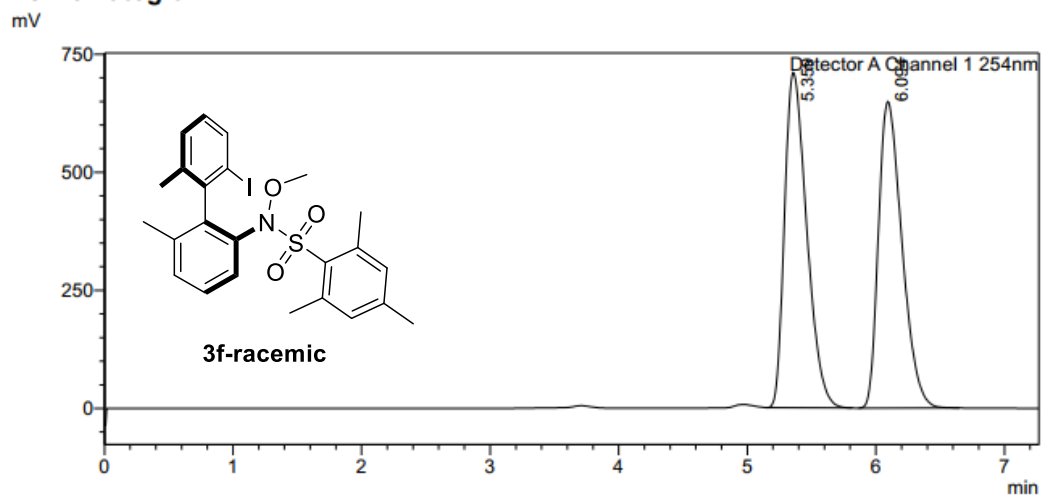

### <Peak Table>

Detector A Channel 1 254nm

| Peak# | Ret. Time | Area     | Height  | Conc.  | Unit | Mark | Name |
|-------|-----------|----------|---------|--------|------|------|------|
| 1     | 5.359     | 8514583  | 709437  | 50.763 |      | M    |      |
| 2     | 6.094     | 8258544  | 649237  | 49.237 |      | M    |      |
| Total |           | 16773127 | 1358675 |        |      |      |      |

### <Sample Information>

Sample Name : LQG-2-99(AD-5%, 1.0,ee)  
Sample ID :  
Data Filename : LQG-2-99(AD-5%, 1.0,ee).lcd  
Method Filename : GWJ single.lcm  
Batch Filename :  
Vial # : 1-1  
Injection Volume : 15 uL  
Date Acquired : 4/28/2019 4:07:36 PM  
Date Processed : 4/28/2019 4:57:51 PM

Sample Type : Unknown  
Acquired by : System Administrator  
Processed by : System Administrator

### <Chromatogram>

mV

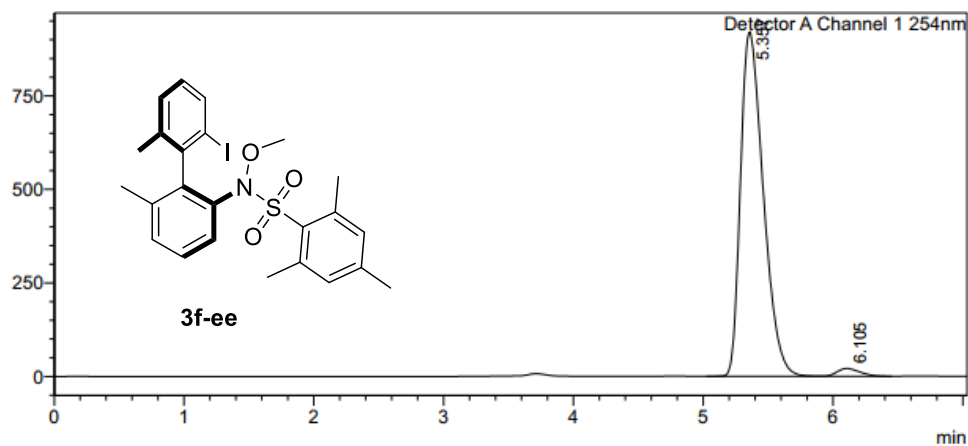

### <Peak Table>

Detector A Channel 1 254nm

| Peak# | Ret. Time | Area     | Height | Conc.  | Unit | Mark | Name |
|-------|-----------|----------|--------|--------|------|------|------|
| 1     | 5.357     | 11247920 | 920082 | 97.723 |      |      |      |
| 2     | 6.105     | 262117   | 20958  | 2.277  |      | V    |      |
| Total |           | 11510037 | 941040 |        |      |      |      |



Data File F:\DATA\LQG\DATA\lqg-1-151-2(AD,5%,1.0,RACE).D  
Sample Name: lqg-1-151-2(AD,5%,1.0,RACE)

```
=====
Acq. Operator   : SYSTEM
Sample Operator : SYSTEM
Acq. Instrument : LC1260                      Location : 1
Injection Date  : 09/10/2018 20:40:19
                                           Inj Volume : Manually

Acq. Method     : F:\METHOD\rxdeg.M
Last changed    : 09/10/2018 20:19:51 by SYSTEM
                  (modified after loading)
Analysis Method : C:\Chem32\1\Methods\DEF_LC.M
Last changed    : 13/02/2014 23:27:44 by SYSTEM
Additional Info  : Peak(s) manually integrated
=====
```

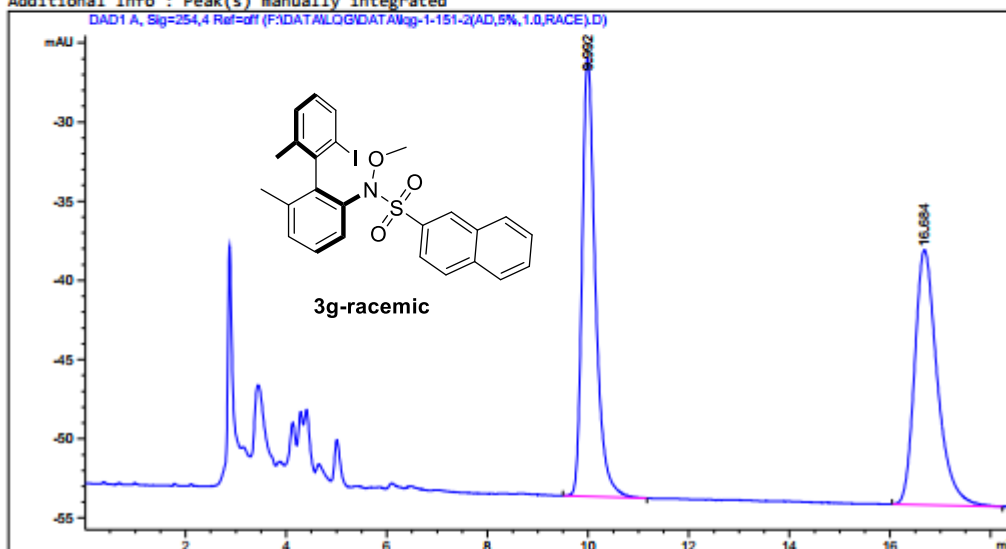

# Area Percent Report

```
=====
Sorted By      : Signal
Multiplier     : 1.0000
Dilution       : 1.0000
Use Multiplier & Dilution Factor with ISTDs
=====
```

Signal 1: DAD1 A, Sig=254,4 Ref=off

| Peak # | RetTime [min] | Type | Width [min] | Area [mAU*s] | Height [mAU] | Area %  |
|--------|---------------|------|-------------|--------------|--------------|---------|
| 1      | 9.992         | BB   | 0.2773      | 506.69492    | 27.71560     | 50.2195 |
| 2      | 16.684        | BB   | 0.4739      | 502.26578    | 16.10133     | 49.7805 |

Totals : 1008.96069 43.81694

Data File F:\DATA\LQG\DATA\lqg-3-17(AD,5%,1.0,EE).D  
Sample Name: lqg-3-17(AD,5%,1.0,EE)

=====

|                 |                                 |                     |
|-----------------|---------------------------------|---------------------|
| Acq. Operator   | : SYSTEM                        |                     |
| Sample Operator | : SYSTEM                        |                     |
| Acq. Instrument | : LC1260                        | Location : 1        |
| Injection Date  | : 16/06/2019 09:40:37           |                     |
|                 |                                 | Inj Volume : No inj |
| Acq. Method     | : F:\METHOD\LQG.M\LQG.M         |                     |
| Last changed    | : 16/06/2019 09:37:20 by SYSTEM |                     |
|                 | (modified after loading)        |                     |
| Analysis Method | : C:\Chem32\1\Methods\DEF_LC.M  |                     |
| Last changed    | : 13/02/2014 23:27:44 by SYSTEM |                     |
| Additional Info | : Peak(s) manually integrated   |                     |

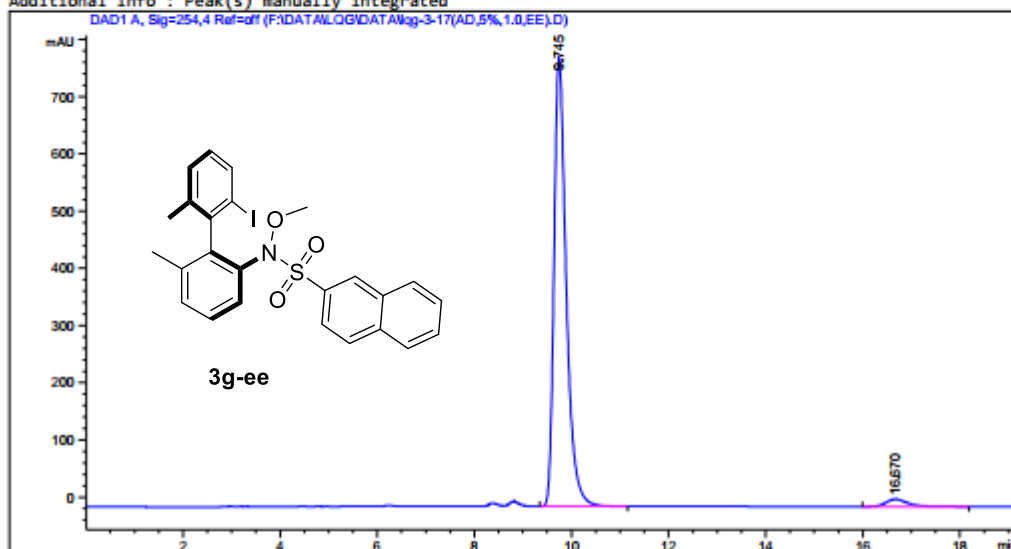

=====  
Area Percent Report  
=====

Sorted By : Signal  
Multiplier : 1.0000  
Dilution : 1.0000  
Use Multiplier & Dilution Factor with ISTDs

Signal 1: DAD1 A, Sig=254,4 Ref=off

| Peak # | RetTime [min] | Type | Width [min] | Area [mAU*s] | Height [mAU] | Area %  |
|--------|---------------|------|-------------|--------------|--------------|---------|
| 1      | 9.745         | BB   | 0.2632      | 1.36613e4    | 784.35779    | 97.2126 |
| 2      | 16.670        | BB   | 0.4599      | 391.71805    | 12.76794     | 2.7874  |

Totals : 1.40530e4 797.12573

Data File F:\DATA\LQG\DATA\LQG-2-56-1(2)(AD,5%,1.0,race).D  
Sample Name: LQG-2-56-1(2)(AD,10%,1.0,race)

```
=====
Acq. Operator   : SYSTEM
Sample Operator : SYSTEM
Acq. Instrument : LC1260                      Location :   1
Injection Date  : 11/04/2019 20:47:11
                                           Inj Volume : No inj

Acq. Method     : F:\METHOD\LQG.M\LQG.M
Last changed    : 11/04/2019 20:44:24 by SYSTEM
                  (modified after loading)
Analysis Method : C:\Chem32\1\Methods\DEF_LC.M
Last changed    : 13/02/2014 23:27:44 by SYSTEM
Additional Info  : Peak(s) manually integrated
=====
```

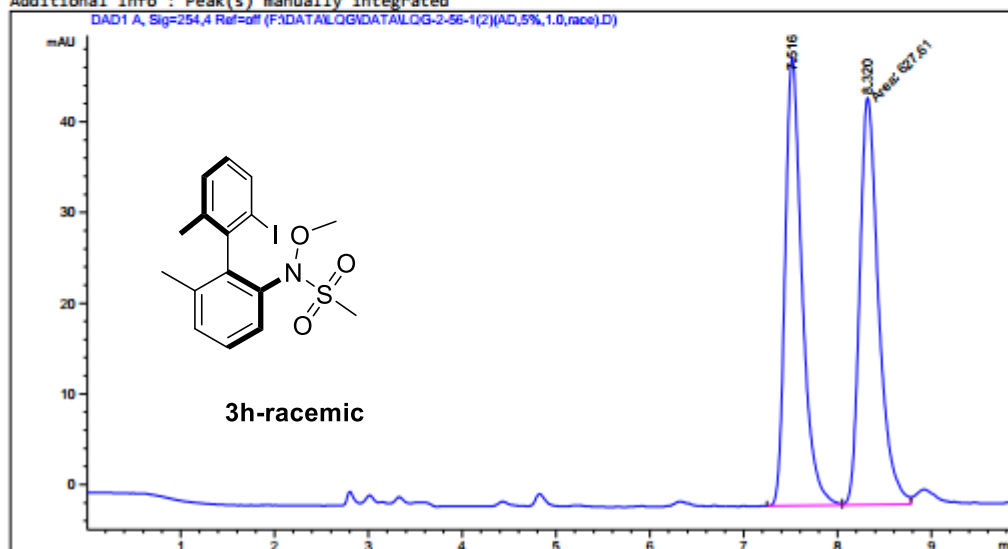

Area Percent Report

```
=====
Sorted By      : Signal
Multiplier     : 1.0000
Dilution       : 1.0000
Use Multiplier & Dilution Factor with ISTDs
=====
```

Signal 1: DAD1 A, Sig=254,4 Ref=off

| Peak # | RetTime [min] | Type | Width [min] | Area [mAU*s] | Height [mAU] | Area %  |
|--------|---------------|------|-------------|--------------|--------------|---------|
| 1      | 7.516         | BV   | 0.1879      | 617.53455    | 49.39601     | 49.5954 |
| 2      | 8.320         | MF   | 0.2332      | 627.60956    | 44.86383     | 50.4046 |

Totals : 1245.14410 94.25984

Data File F:\DATA\LQG\DATA\LQG-2-56-1(AD,5%,1.0,ee).D  
Sample Name: LQG-2-56-1(AD,5%,1.0,ee)

=====

Acq. Operator : SYSTEM

Location : 1

Injection Date : 11/04/2019 20:59:46

Acq. Method : LQG.M

Analysis Method : C:\Chem32\1\Methods\DEF\_LC.M

Last changed : 13/02/2014 23:27:44 by SYSTEM

Additional Info : Peak(s) manually integrated

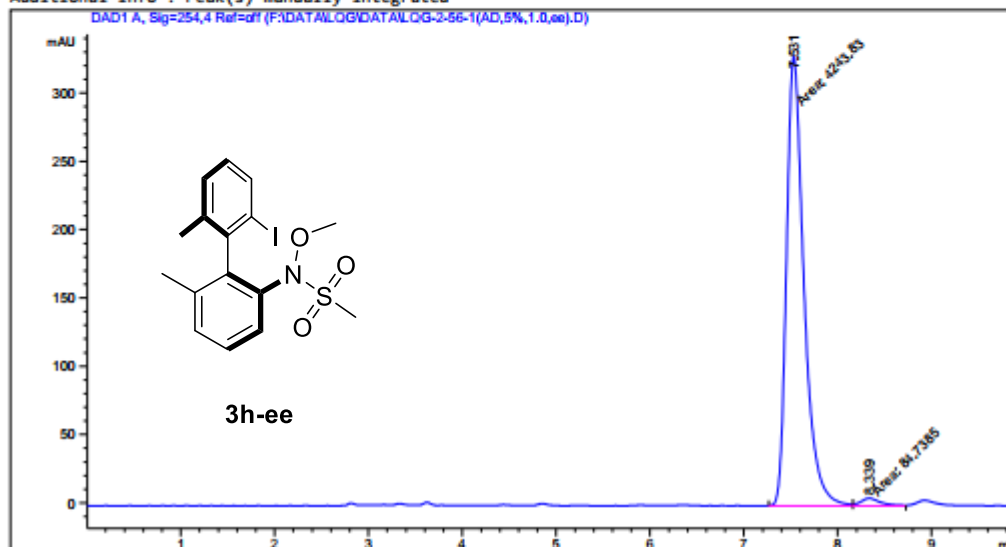

=====

Area Percent Report

=====

Sorted By : Signal  
Multiplier : 1.0000  
Dilution : 1.0000  
Use Multiplier & Dilution Factor with ISTDs

Signal 1: DAD1 A, Sig=254,4 Ref=off

| Peak # | RetTime [min] | Type | Width [min] | Area [mAU*s] | Height [mAU] | Area %  |
|--------|---------------|------|-------------|--------------|--------------|---------|
| 1      | 7.531         | MF   | 0.2147      | 4243.83008   | 329.37405    | 98.0423 |
| 2      | 8.339         | FM   | 0.2536      | 84.73846     | 5.56881      | 1.9577  |

Totals : 4328.56854 334.94286

=====

\*\*\* End of Report \*\*\*

Data File F:\DATA\LQG\DATA\lqg-2-50(AD,10%,1.0, race).D  
Sample Name: lqg-2-50(AD,10%,1.0, race)

=====

|                 |                                 |                     |
|-----------------|---------------------------------|---------------------|
| Acq. Operator   | : SYSTEM                        |                     |
| Sample Operator | : SYSTEM                        |                     |
| Acq. Instrument | : LC1260                        | Location : 1        |
| Injection Date  | : 07/04/2019 19:25:37           |                     |
|                 |                                 | Inj Volume : No inj |
| Acq. Method     | : F:\METHOD\LQG.M\LQG.M         |                     |
| Last changed    | : 07/04/2019 19:17:58 by SYSTEM |                     |
|                 | (modified after loading)        |                     |
| Analysis Method | : C:\Chem32\1\Methods\DEF_LC.M  |                     |
| Last changed    | : 13/02/2014 23:27:44 by SYSTEM |                     |
| Additional Info | : Peak(s) manually integrated   |                     |

DAD1 A, Sig=254,4 Ref=off (F:\DATA\LQG\DATA\lqg-2-50(AD,10%,1.0, race).D)

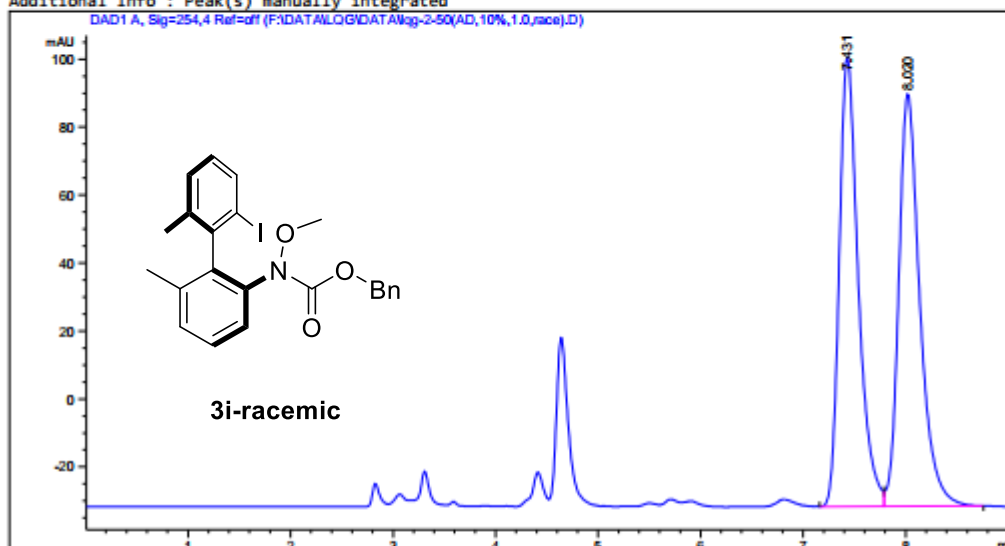

=====  
Area Percent Report  
=====

Sorted By : Signal  
Multiplier : 1.0000  
Dilution : 1.0000  
Use Multiplier & Dilution Factor with ISTDs

Signal 1: DAD1 A, Sig=254,4 Ref=off

| Peak # | RetTime [min] | Type | Width [min] | Area [mAU*s] | Height [mAU] | Area %  |
|--------|---------------|------|-------------|--------------|--------------|---------|
| 1      | 7.431         | BV   | 0.1967      | 1705.54810   | 132.07222    | 49.5472 |
| 2      | 8.020         | VB   | 0.2172      | 1736.72070   | 121.21343    | 50.4528 |

Totals : 3442.26880 253.28565

Data File F:\DATA\LQG\DATA\lqg-2-50(AD,10%,1.0,ee).D  
Sample Name: lqg-2-50(AD,10%,1.0,ee)

=====

|                 |                                 |                     |
|-----------------|---------------------------------|---------------------|
| Acq. Operator   | : SYSTEM                        |                     |
| Sample Operator | : SYSTEM                        |                     |
| Acq. Instrument | : LC1260                        | Location : 1        |
| Injection Date  | : 07/04/2019 19:37:35           |                     |
|                 |                                 | Inj Volume : No inj |
| Acq. Method     | : F:\METHOD\LQG.M\LQG.M         |                     |
| Last changed    | : 07/04/2019 19:17:58 by SYSTEM |                     |
|                 | (modified after loading)        |                     |
| Analysis Method | : C:\Chem32\1\Methods\DEF_LC.M  |                     |
| Last changed    | : 13/02/2014 23:27:44 by SYSTEM |                     |
| Additional Info | : Peak(s) manually integrated   |                     |

DAD1 A, Sig=254,4 Ref=off (F:\DATA\LQG\DATA\lqg-2-50(AD,10%,1.0,ee).D)

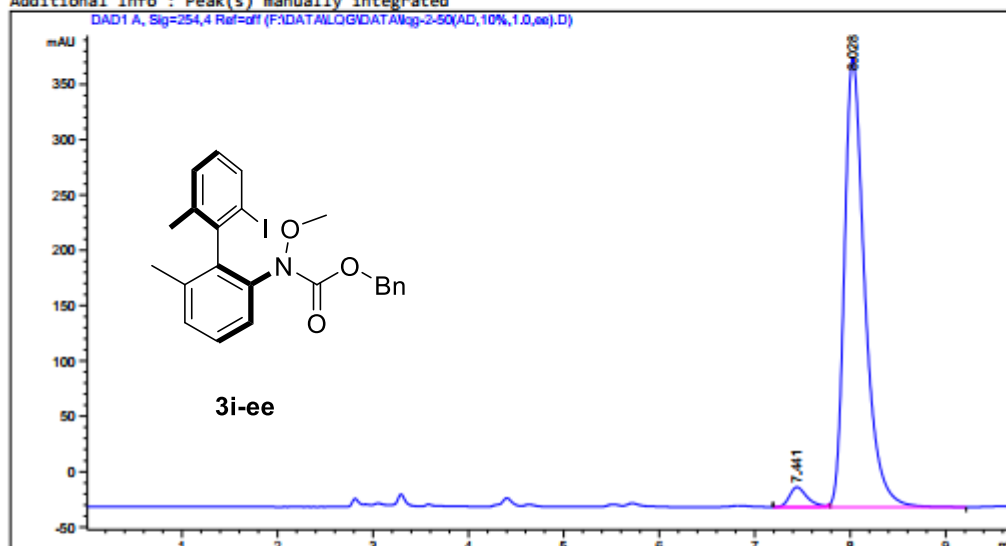

=====  
Area Percent Report  
=====

Sorted By : Signal  
Multiplier : 1.0000  
Dilution : 1.0000  
Use Multiplier & Dilution Factor with ISTDs

Signal 1: DAD1 A, Sig=254,4 Ref=off

| Peak # | RetTime [min] | Type | Width [min] | Area [mAU*s] | Height [mAU] | Area %  |
|--------|---------------|------|-------------|--------------|--------------|---------|
| 1      | 7.441         | BV E | 0.1919      | 229.95912    | 17.89172     | 3.6998  |
| 2      | 8.028         | VB R | 0.2239      | 5985.53516   | 406.23102    | 96.3002 |

Totals : 6215.49428 424.12273

Data File F:\DATA\LQG\DATA\LQG-3-10(OD,0.5%,1.0,RAC)-2.D  
Sample Name: LQG-3-10(OD,0.5%,1.0,RAC)-2

=====

Acq. Operator : SYSTEM  
Sample Operator : SYSTEM  
Acq. Instrument : LC1260 Location : 1  
Injection Date : 13/06/2019 21:05:48 Inj Volume : No inj

Acq. Method : F:\METHOD\LQG.M\LQG.M  
Last changed : 13/06/2019 20:40:33 by SYSTEM  
(modified after loading)

Analysis Method : C:\Chem32\1\Methods\DEF\_LC.M  
Last changed : 13/02/2014 23:27:44 by SYSTEM

Additional Info : Peak(s) manually integrated

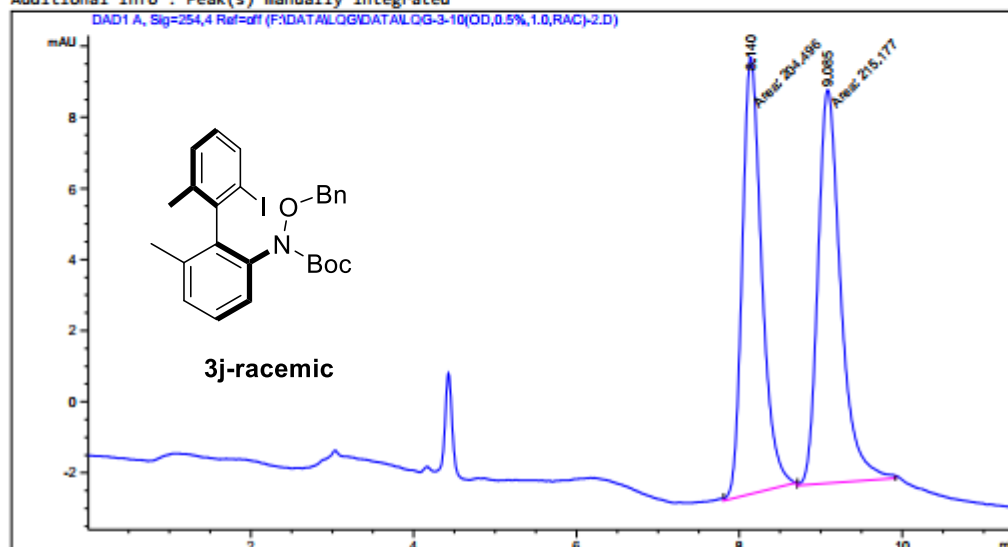

=====  
Area Percent Report  
=====

Sorted By : Signal  
Multiplier : 1.0000  
Dilution : 1.0000  
Use Multiplier & Dilution Factor with ISTDs

Signal 1: DAD1 A, Sig=254,4 Ref=off

| Peak # | RetTime [min] | Type | Width [min] | Area [mAU*s] | Height [mAU] | Area %  |
|--------|---------------|------|-------------|--------------|--------------|---------|
| 1      | 8.140         | MM   | 0.2776      | 204.49597    | 12.27596     | 48.7274 |
| 2      | 9.085         | MM   | 0.3241      | 215.17735    | 11.06642     | 51.2726 |

Totals : 419.67332 23.34238

Data File F:\DATA\LQG\DATA\LQG-3-10(OD,0.5%,1.0,EE).D  
Sample Name: LQG-3-10(OD,0.5%,1.0,EE)

=====

|                 |                                 |                     |
|-----------------|---------------------------------|---------------------|
| Acq. Operator   | : SYSTEM                        |                     |
| Sample Operator | : SYSTEM                        |                     |
| Acq. Instrument | : LC1260                        | Location : 1        |
| Injection Date  | : 13/06/2019 21:19:37           |                     |
|                 |                                 | Inj Volume : No inj |
| Acq. Method     | : F:\METHOD\LQG.M\LQG.M         |                     |
| Last changed    | : 13/06/2019 20:40:33 by SYSTEM |                     |
|                 | (modified after loading)        |                     |
| Analysis Method | : C:\Chem32\1\Methods\DEF_LC.M  |                     |
| Last changed    | : 13/02/2014 23:27:44 by SYSTEM |                     |
| Additional Info | : Peak(s) manually integrated   |                     |

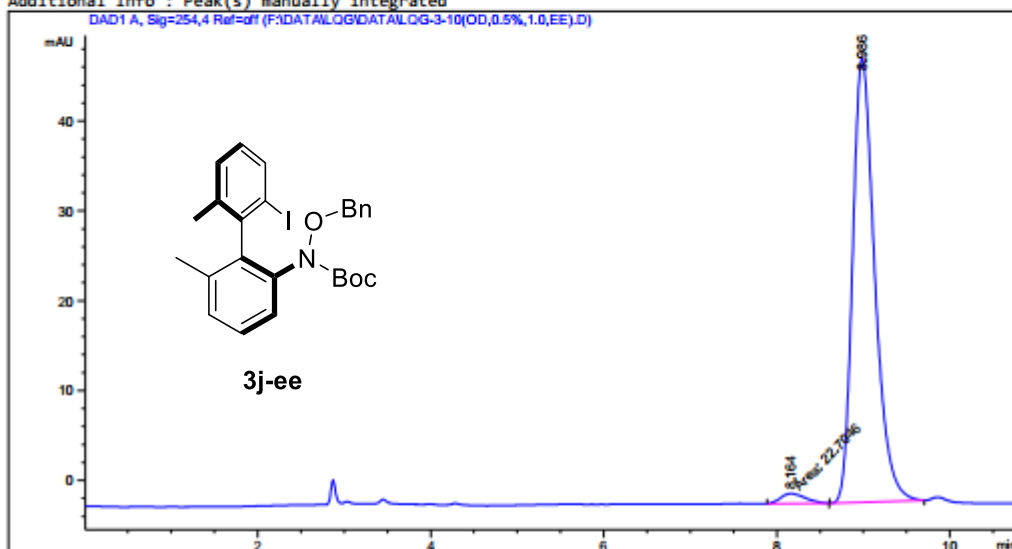

=====  
Area Percent Report  
=====

Sorted By : Signal  
Multiplier : 1.0000  
Dilution : 1.0000  
Use Multiplier & Dilution Factor with ISTDs

Signal 1: DAD1 A, Sig=254,4 Ref=off

| Peak # | RetTime [min] | Type | Width [min] | Area [mAU*s] | Height [mAU] | Area %  |
|--------|---------------|------|-------------|--------------|--------------|---------|
| 1      | 8.164         | MM   | 0.3359      | 22.70460     | 1.12672      | 2.5209  |
| 2      | 8.986         | BB   | 0.2731      | 877.96289    | 49.46983     | 97.4791 |

Totals : 900.66749 50.59655



### <Sample Information>

Sample Name : lqg-2-139-1(AD,5%,1.0,rac)  
Sample ID :  
Data Filename : lqg-2-139-1(AD,5%,1.0,rac).lcd  
Method Filename : GWJ single.lcm  
Batch Filename :  
Vial # : 1-1  
Injection Volume : 15 uL  
Date Acquired : 5/13/2019 5:51:39 PM  
Date Processed : 5/13/2019 6:04:53 PM

Sample Type : Unknown  
Acquired by : System Administrator  
Processed by : System Administrator

### <Chromatogram>

mV

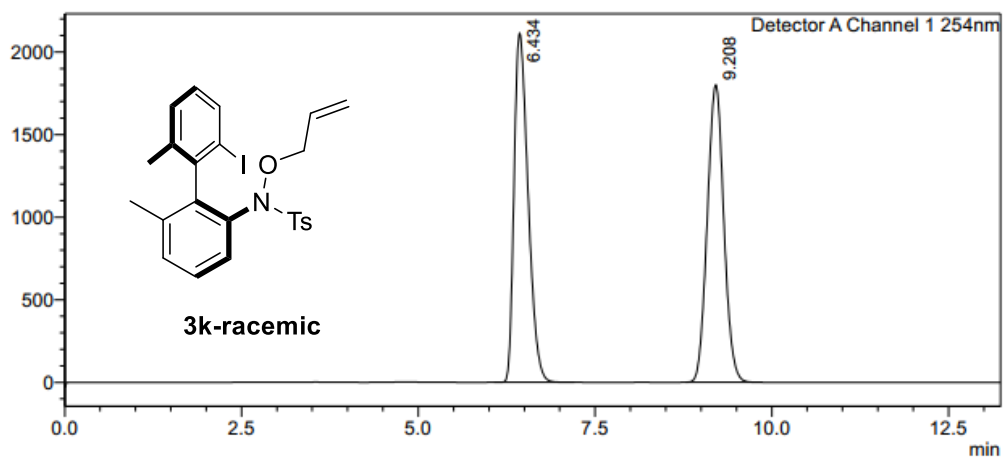

### <Peak Table>

Detector A Channel 1 254nm

| Peak# | Ret. Time | Area     | Height  | Conc.  | Unit | Mark | Name |
|-------|-----------|----------|---------|--------|------|------|------|
| 1     | 6.434     | 29153697 | 2111293 | 49.815 |      | M    |      |
| 2     | 9.208     | 29369842 | 1800452 | 50.185 |      | M    |      |
| Total |           | 58523539 | 3911745 |        |      |      |      |

### <Sample Information>

Sample Name : lqg-2-139-1(AD,5%,1.0,ee)  
Sample ID :  
Data Filename : lqg-2-139-1(AD,5%,1.0,ee).lcd  
Method Filename : GWJ single.lcm  
Batch Filename :  
Vial # : 1-1  
Injection Volume : 15 uL  
Date Acquired : 5/13/2019 6:05:44 PM  
Date Processed : 5/13/2019 6:16:26 PM

Sample Type : Unknown  
Acquired by : System Administrator  
Processed by : System Administrator

### <Chromatogram>

mV

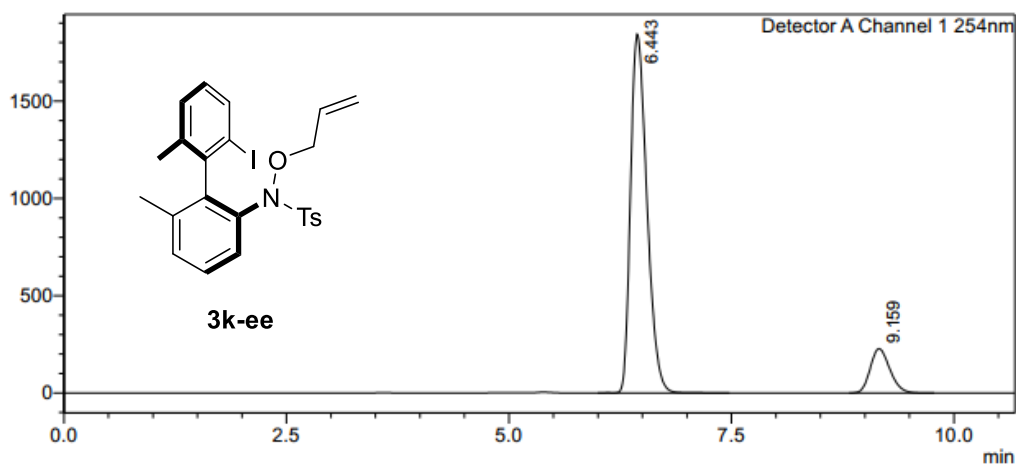

### <Peak Table>

Detector A Channel 1 254nm

| Peak# | Ret. Time | Area     | Height  | Conc.  | Unit | Mark | Name |
|-------|-----------|----------|---------|--------|------|------|------|
| 1     | 6.443     | 23576801 | 1841594 | 87.145 |      | M    |      |
| 2     | 9.159     | 3477787  | 227148  | 12.855 |      | M    |      |
| Total |           | 27054588 | 2068742 |        |      |      |      |

### <Sample Information>

Sample Name : LQG-2-61(AD,5%,1.0,race)  
Sample ID :  
Data Filename : LQG-2-61(AD,5%,1.0,race).lcd  
Method Filename : GWJ single.lcm  
Batch Filename :  
Vial # : 1-1  
Injection Volume : 15 uL  
Date Acquired : 4/13/2019 6:48:46 PM  
Date Processed : 4/13/2019 7:01:36 PM

Sample Type : Unknown  
Acquired by : System Administrator  
Processed by : System Administrator

### <Chromatogram>

mV

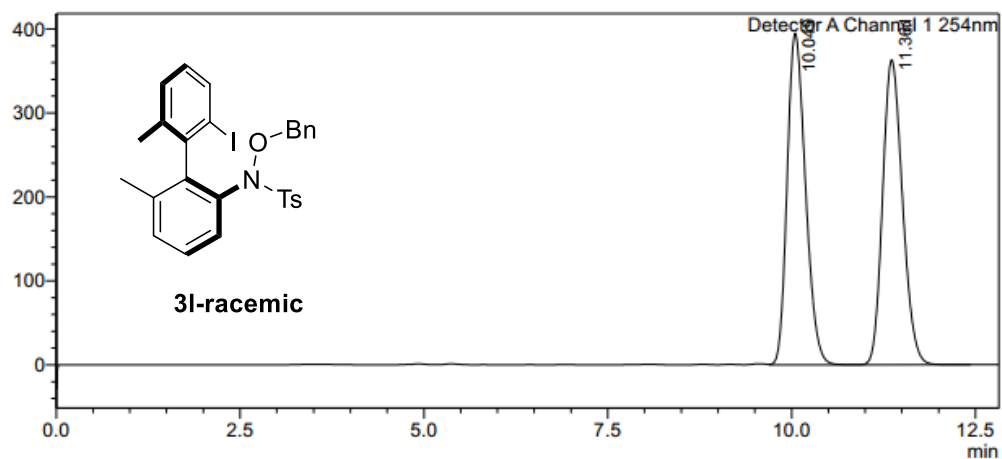

### <Peak Table>

Detector A Channel 1 254nm

| Peak# | Ret. Time | Area     | Height | Conc.  | Unit | Mark | Name |
|-------|-----------|----------|--------|--------|------|------|------|
| 1     | 10.049    | 6833796  | 394522 | 50.048 |      |      |      |
| 2     | 11.361    | 6820697  | 362831 | 49.952 |      | V    |      |
| Total |           | 13654494 | 757353 |        |      |      |      |

### <Sample Information>

Sample Name : LQG-2-61(AD,5%,1.0,ee)  
Sample ID :  
Data Filename : LQG-2-61(AD,5%,1.0,ee).lcd  
Method Filename : GWJ single.lcm  
Batch Filename :  
Vial # : 1-1  
Injection Volume : 15 uL  
Date Acquired : 4/13/2019 7:06:26 PM  
Date Processed : 4/13/2019 7:19:16 PM

Sample Type : Unknown  
Acquired by : System Administrator  
Processed by : System Administrator

### <Chromatogram>

mV

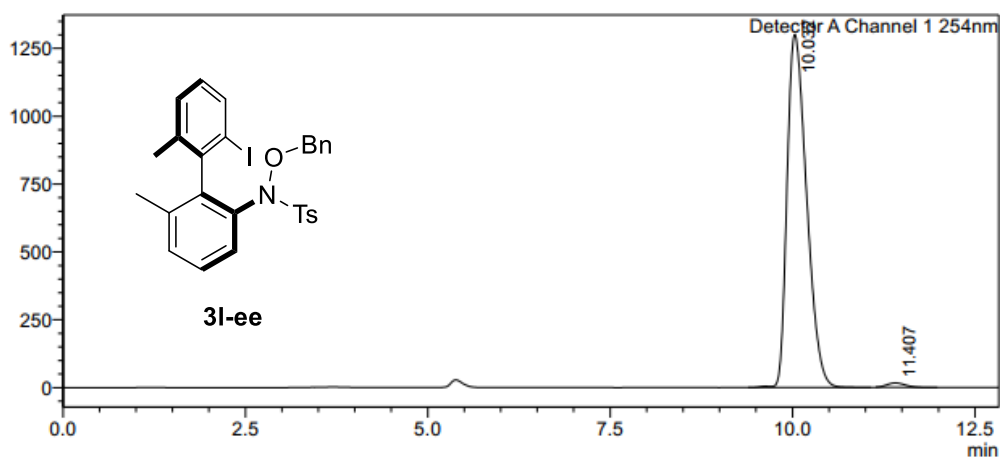

### <Peak Table>

Detector A Channel 1 254nm

| Peak# | Ret. Time | Area     | Height  | Conc.  | Unit | Mark | Name |
|-------|-----------|----------|---------|--------|------|------|------|
| 1     | 10.032    | 24222313 | 1300280 | 98.829 |      | M    |      |
| 2     | 11.407    | 286886   | 16385   | 1.171  |      | M    |      |
| Total |           | 24509199 | 1316664 |        |      |      |      |

### <Sample Information>

Sample Name : lqg-2-139-2(AD,5%,1.0,rac)  
Sample ID :  
Data Filename : lqg-2-139-2(AD,5%,1.0,rac).lcd  
Method Filename : GWJ single.lcm  
Batch Filename :  
Vial # : 1-1  
Injection Volume : 15 uL  
Date Acquired : 5/13/2019 6:20:26 PM  
Date Processed : 5/13/2019 8:02:33 PM

Sample Type : Unknown  
Acquired by : System Administrator  
Processed by : System Administrator

### <Chromatogram>

mV

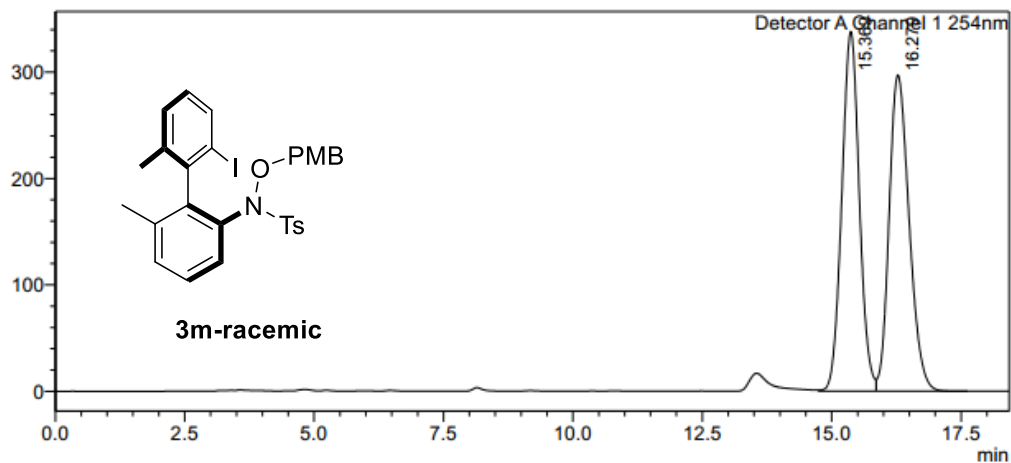

### <Peak Table>

Detector A Channel 1 254nm

| Peak# | Ret. Time | Area     | Height | Conc.  | Unit | Mark | Name |
|-------|-----------|----------|--------|--------|------|------|------|
| 1     | 15.369    | 7962296  | 337984 | 49.907 |      |      |      |
| 2     | 16.279    | 7992077  | 297179 | 50.093 |      | SV   |      |
| Total |           | 15954373 | 635163 |        |      |      |      |

### <Sample Information>

Sample Name : lqg-2-139-2(AD,5%,1.0,ee)  
Sample ID :  
Data Filename : lqg-2-139-2(AD,5%,1.0,ee).lcd  
Method Filename : GWJ single.lcm  
Batch Filename :  
Vial # : 1-1  
Injection Volume : 15 uL  
Date Acquired : 5/13/2019 6:47:05 PM  
Date Processed : 5/13/2019 8:01:14 PM

Sample Type : Unknown  
Acquired by : System Administrator  
Processed by : System Administrator

### <Chromatogram>

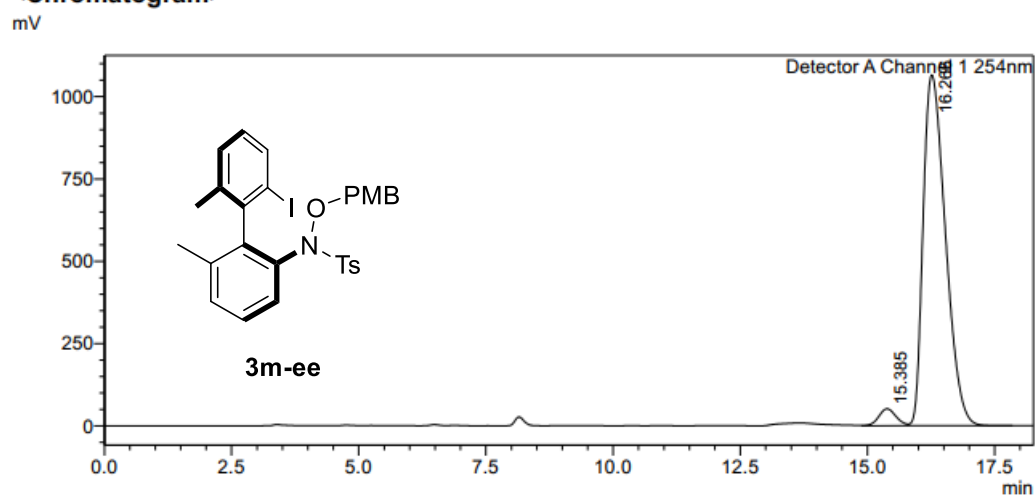

### <Peak Table>

Detector A Channel 1 254nm

| Peak# | Ret. Time | Area     | Height  | Conc.  | Unit | Mark | Name |
|-------|-----------|----------|---------|--------|------|------|------|
| 1     | 15.385    | 1220020  | 51682   | 3.621  |      |      |      |
| 2     | 16.266    | 32468845 | 1065603 | 96.379 |      | V    |      |
| Total |           | 33688864 | 1117286 |        |      |      |      |

Data File F:\DATA\LQG\DATA\LQG-1-179(AD,5%,1.0,race).D  
Sample Name: LQG-1-179(AD,5%,1.0,race)

=====

Acq. Operator : SYSTEM

Location : 1

Injection Date : 19/12/2018 17:47:13

Acq. Method : LQG.M

Analysis Method : C:\Chem32\1\Methods\DEF\_LC.M

Last changed : 13/02/2014 23:27:44 by SYSTEM

Additional Info : Peak(s) manually integrated

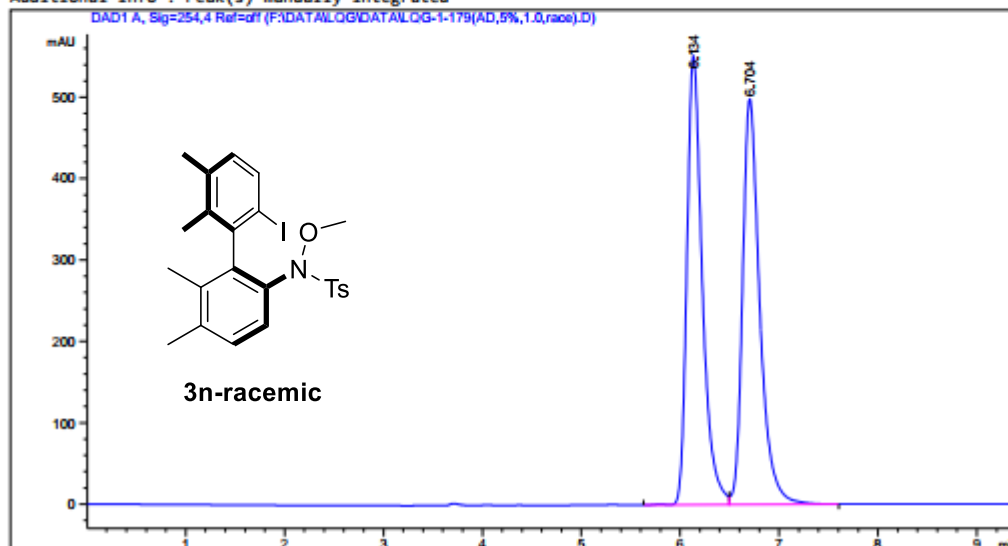

=====

Area Percent Report

=====

Sorted By : Signal

Multiplier : 1.0000

Dilution : 1.0000

Use Multiplier & Dilution Factor with ISTDs

Signal 1: DAD1 A, Sig=254,4 Ref=off

| Peak # | RetTime [min] | Type | Width [min] | Area [mAU*s] | Height [mAU] | Area %  |
|--------|---------------|------|-------------|--------------|--------------|---------|
| 1      | 6.134         | VV R | 0.1622      | 5960.21729   | 551.11469    | 49.7273 |
| 2      | 6.704         | VB   | 0.1831      | 6025.59229   | 498.21259    | 50.2727 |

Totals : 1.19858e4 1049.32727

=====

\*\*\* End of Report \*\*\*

Data File F:\DATA\LQG\DATA\lqg-2-41-1(AD,5%,1.0,ee).D  
Sample Name: lqg-2-41-1(AD,5%,1.0,ee)

```
=====
Acq. Operator   : SYSTEM
Sample Operator : SYSTEM
Acq. Instrument : LC1260
Injection Date  : 04/04/2019 15:42:54
Location       : 1
Inj Volume     : No inj

Acq. Method    : F:\METHOD\LQG.M\LQG.M
Last changed   : 04/04/2019 15:38:24 by SYSTEM
                (modified after loading)
Analysis Method: C:\Chem32\1\Methods\DEF_LC.M
Last changed   : 13/02/2014 23:27:44 by SYSTEM
Additional Info : Peak(s) manually integrated
=====
```

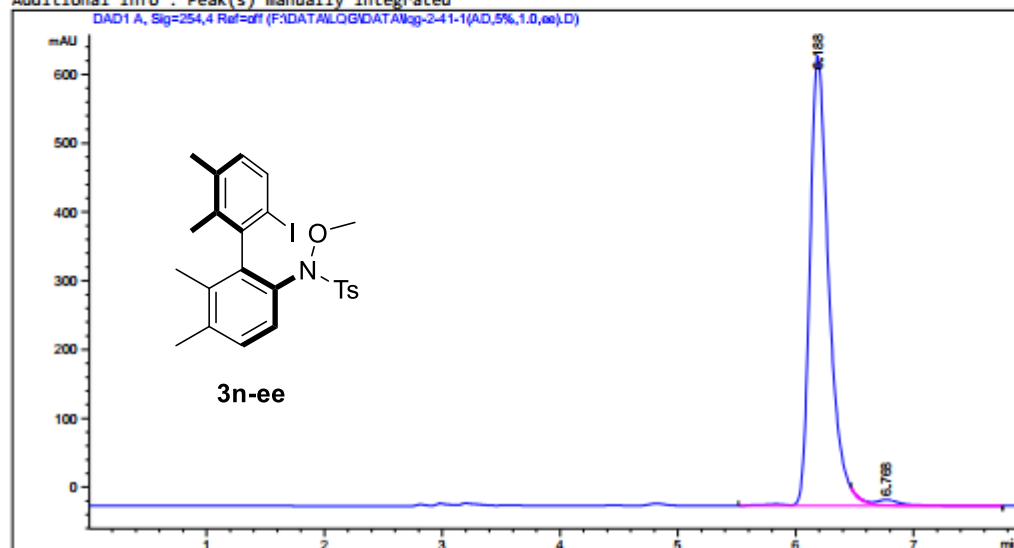

# Area Percent Report

```
Sorted By      : Signal
Multiplier     : 1.0000
Dilution       : 1.0000
Use Multiplier & Dilution Factor with ISTDs
```

Signal 1: DAD1 A, Sig=254,4 Ref=off

| Peak # | RetTime [min] | Type | Width [min] | Area [mAU*s] | Height [mAU] | Area %  |
|--------|---------------|------|-------------|--------------|--------------|---------|
| 1      | 6.188         | VV R | 0.1687      | 7347.11621   | 652.88885    | 98.3552 |
| 2      | 6.768         | VB E | 0.2118      | 122.86988    | 8.24781      | 1.6448  |

Totals : 7469.98609 661.13667



### <Sample Information>

Sample Name : lqg-2-153-1(AD,5%,1.0,rac)  
Sample ID :  
Data Filename : lqg-2-153-1(AD,5%,1.0,rac).lcd  
Method Filename : GWJ single.lcm  
Batch Filename :  
Vial # : 1-1  
Injection Volume : 15 uL  
Date Acquired : 5/17/2019 10:43:47 AM  
Date Processed : 5/17/2019 10:58:50 AM

Sample Type : Unknown  
Acquired by : System Administrator  
Processed by : System Administrator

### <Chromatogram>

mV

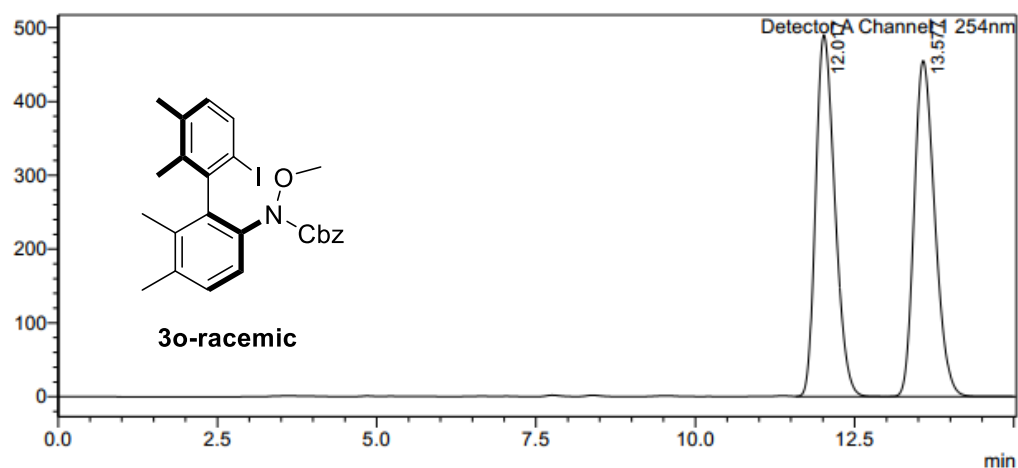

### <Peak Table>

Detector A Channel 1 254nm

| Peak# | Ret. Time | Area     | Height | Conc.  | Unit | Mark | Name |
|-------|-----------|----------|--------|--------|------|------|------|
| 1     | 12.017    | 10246056 | 489727 | 49.902 |      |      |      |
| 2     | 13.577    | 10286221 | 454864 | 50.098 |      | V    |      |
| Total |           | 20532276 | 944590 |        |      |      |      |

### <Sample Information>

|                  |                                  |              |                        |
|------------------|----------------------------------|--------------|------------------------|
| Sample Name      | : LQG-2-153-1(AD-5%, 1.0,EE)     | Sample Type  | : Unknown              |
| Sample ID        | :                                |              |                        |
| Data Filename    | : LQG-2-153-1(AD-5%, 1.0,EE).lcd | Acquired by  | : System Administrator |
| Method Filename  | : LCY single.lcm                 | Processed by | : System Administrator |
| Batch Filename   | :                                |              |                        |
| Vial #           | : 1-1                            |              |                        |
| Injection Volume | : 15 uL                          |              |                        |
| Date Acquired    | : 5/17/2019 1:36:09 PM           |              |                        |
| Date Processed   | : 5/17/2019 1:50:59 PM           |              |                        |

### <Chromatogram>

mV

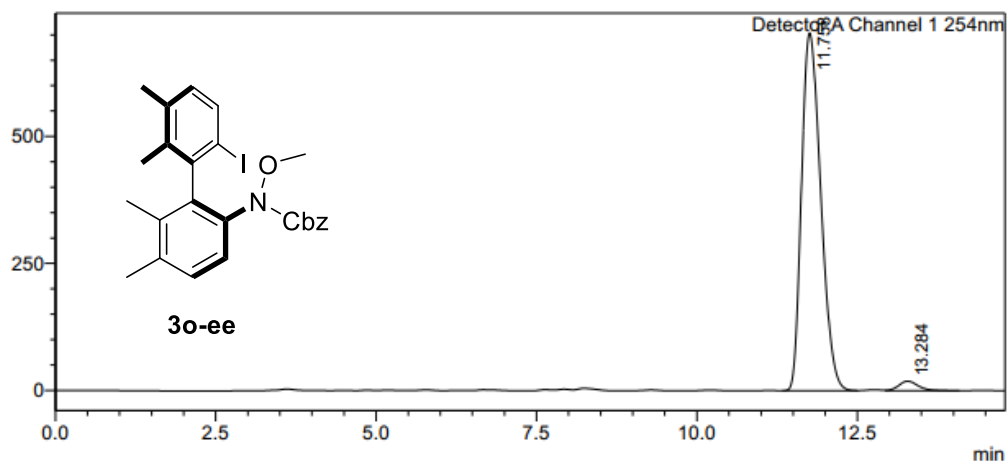

### <Peak Table>

Detector A Channel 1 254nm

| Peak# | Ret. Time | Area     | Height | Conc.  | Unit | Mark | Name |
|-------|-----------|----------|--------|--------|------|------|------|
| 1     | 11.758    | 14715431 | 704132 | 97.330 |      |      |      |
| 2     | 13.284    | 403736   | 18833  | 2.670  |      |      |      |
| Total |           | 15119168 | 722966 |        |      |      |      |

Data File F:\DATA\LQG\DATA\LQG-2-41-2(AD,5%,1.0,race).D  
Sample Name: LQG-2-41-2(AD,5%,1.0,race)

=====

Acq. Operator : SYSTEM

Location : 1

Injection Date : 07/04/2019 18:17:05

Acq. Method : LQG.M

Analysis Method : C:\Chem32\1\Methods\DEF\_LC.M

Last changed : 13/02/2014 23:27:44 by SYSTEM

Additional Info : Peak(s) manually integrated

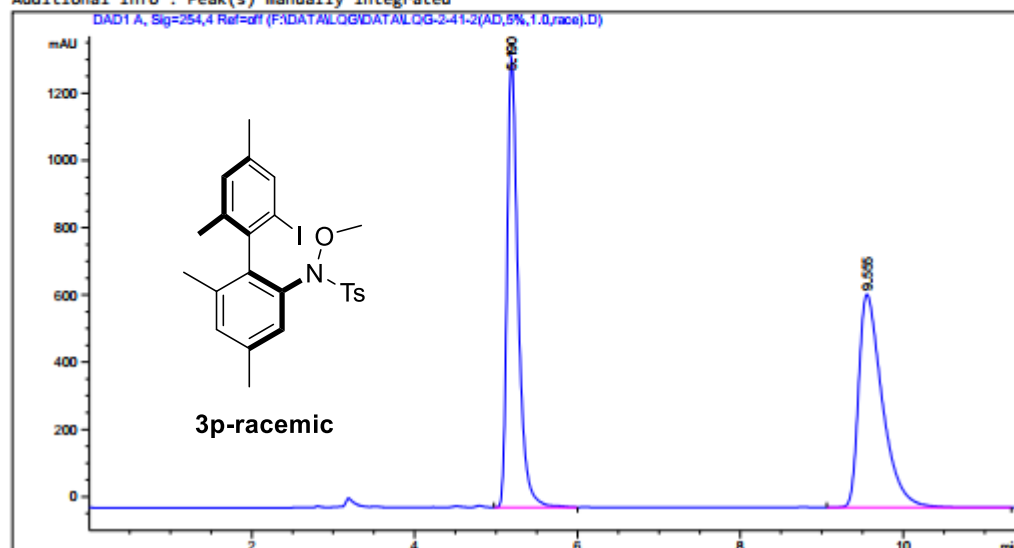

=====

Area Percent Report

=====

Sorted By : Signal  
Multiplier : 1.0000  
Dilution : 1.0000  
Use Multiplier & Dilution Factor with ISTDs

Signal 1: DAD1 A, Sig=254,4 Ref=off

| Peak # | RetTime [min] | Type | Width [min] | Area [mAU*s] | Height [mAU] | Area %  |
|--------|---------------|------|-------------|--------------|--------------|---------|
| 1      | 5.190         | BB   | 0.1420      | 1.25895e4    | 1335.55835   | 49.5909 |
| 2      | 9.555         | BB   | 0.3036      | 1.27972e4    | 633.78894    | 50.4091 |

Totals : 2.53866e4 1969.34729

=====

\*\*\* End of Report \*\*\*

Data File F:\DATA\LQG\DATA\lqg-2-41-2-2(AD,5%,1.0,ee).D  
Sample Name: lqg-2-41-2-2(AD,5%,1.0,ee)

=====

Acq. Operator : SYSTEM

Location : 1

Injection Date : 07/04/2019 19:54:48

Acq. Method : LQG.M

Analysis Method : C:\Chem32\1\Methods\DEF\_LC.M

Last changed : 13/02/2014 23:27:44 by SYSTEM

Additional Info : Peak(s) manually integrated

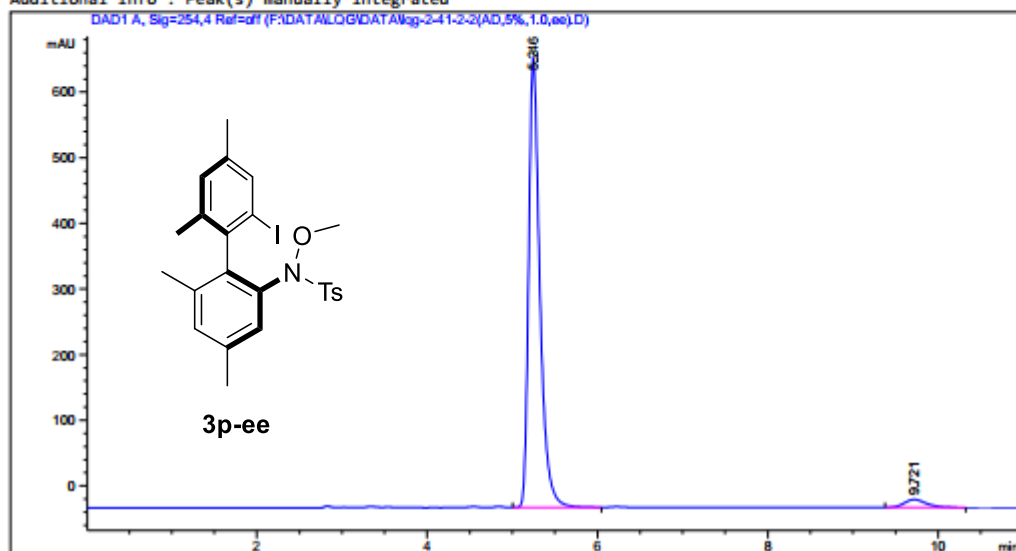

=====

Area Percent Report

=====

Sorted By : Signal  
Multiplier : 1.0000  
Dilution : 1.0000  
Use Multiplier & Dilution Factor with ISTDs

Signal 1: DAD1 A, Sig=254,4 Ref=off

| Peak # | RetTime [min] | Type | Width [min] | Area [mAU*s] | Height [mAU] | Area %  |
|--------|---------------|------|-------------|--------------|--------------|---------|
| 1      | 5.246         | BB   | 0.1370      | 6274.51465   | 684.17462    | 96.7616 |
| 2      | 9.721         | BB   | 0.2693      | 209.99706    | 11.93598     | 3.2384  |

Totals : 6484.51170 696.11061

=====

\*\*\* End of Report \*\*\*

### <Sample Information>

Sample Name : LQG-2-153-2(OD,2%,1.0,rac)  
Sample ID :  
Data Filename : LQG-2-153-2(OD,2%,1.0,rac).lcd  
Method Filename : LQG.lcm  
Batch Filename :  
Vial # : 1-1  
Injection Volume : 15 uL  
Date Acquired : 5/30/2019 11:28:50 PM  
Date Processed : 5/30/2019 11:38:32 PM

Sample Type : Unknown  
Acquired by : System Administrator  
Processed by : System Administrator

### <Chromatogram>

mV

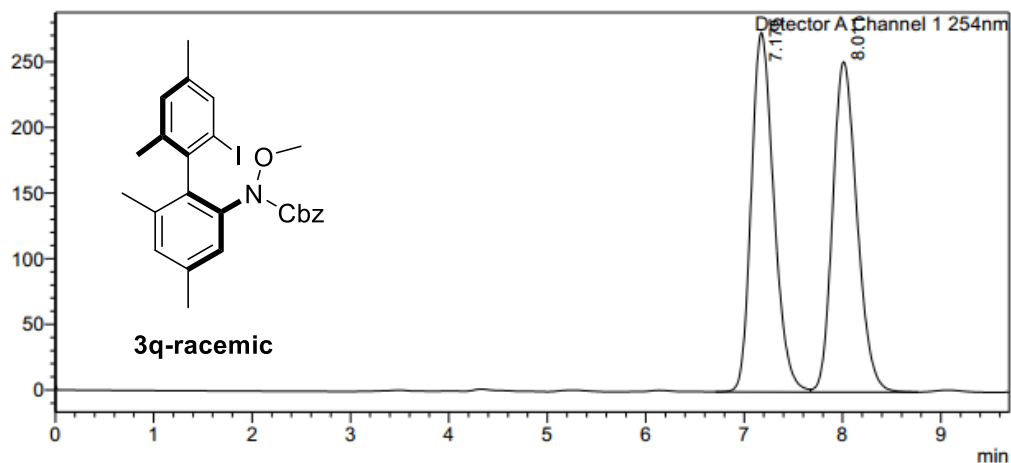

### <Peak Table>

Detector A Channel 1 254nm

| Peak# | Ret. Time | Area    | Height | Conc.  | Unit | Mark | Name |
|-------|-----------|---------|--------|--------|------|------|------|
| 1     | 7.175     | 4366517 | 273718 | 50.225 |      |      |      |
| 2     | 8.011     | 4327365 | 251313 | 49.775 |      | V    |      |
| Total |           | 8693881 | 525031 |        |      |      |      |

### <Sample Information>

Sample Name : LQG-2-153-2(OD,2%,1.0,EE)  
Sample ID :  
Data Filename : LQG-2-153-2(OD,2%,1.0,EE).lcd  
Method Filename : LQG.lcm  
Batch Filename :  
Vial # : 1-1  
Injection Volume : 15 uL  
Date Acquired : 5/30/2019 11:43:45 PM  
Date Processed : 5/30/2019 11:52:54 PM

Sample Type : Unknown  
Acquired by : System Administrator  
Processed by : System Administrator

### <Chromatogram>

mV

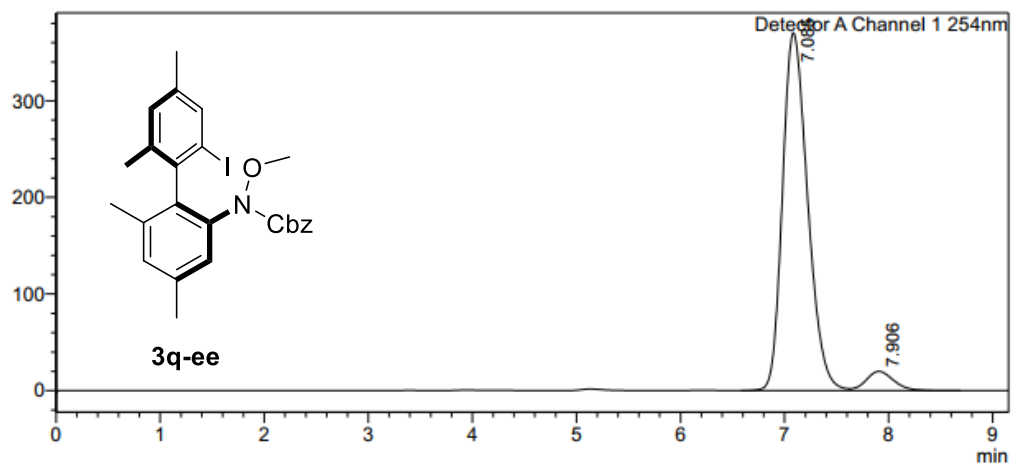

### <Peak Table>

Detector A Channel 1 254nm

| Peak# | Ret. Time | Area    | Height | Conc.  | Unit | Mark | Name |
|-------|-----------|---------|--------|--------|------|------|------|
| 1     | 7.085     | 6222239 | 370115 | 94.360 |      |      |      |
| 2     | 7.906     | 371895  | 19955  | 5.640  |      | V    |      |
| Total |           | 6594133 | 390070 |        |      |      |      |

### <Sample Information>

Sample Name : LQG-2-164(AD,2%,1.0,rac)  
Sample ID :  
Data Filename : LQG-2-164(AD,2%,1.0,rac).lcd  
Method Filename : LQG.lcm  
Batch Filename :  
Vial # : 1-1  
Injection Volume : 15 uL  
Date Acquired : 5/22/2019 8:04:08 PM  
Date Processed : 5/22/2019 8:20:37 PM

Sample Type : Unknown  
Acquired by : System Administrator  
Processed by : System Administrator

### <Chromatogram>

mV

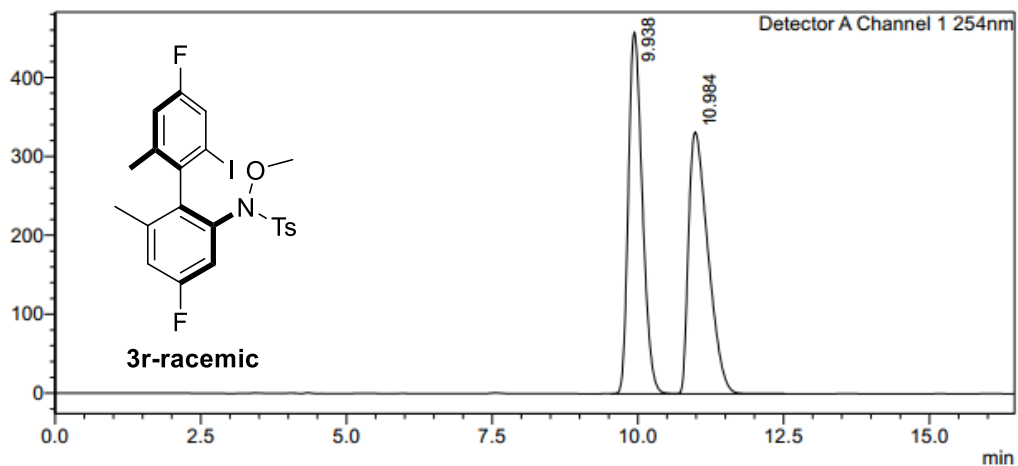

### <Peak Table>

Detector A Channel 1 254nm

| Peak# | Ret. Time | Area     | Height | Conc.  | Unit | Mark | Name |
|-------|-----------|----------|--------|--------|------|------|------|
| 1     | 9.938     | 7647447  | 458004 | 49.819 |      | V    |      |
| 2     | 10.984    | 7703083  | 331421 | 50.181 |      | SV   |      |
| Total |           | 15350530 | 789425 |        |      |      |      |

### <Sample Information>

Sample Name : LQG-2-164(AD,2%,1.0,EE)  
Sample ID :  
Data Filename : LQG-2-164(AD,2%,1.0,EE).lcd  
Method Filename : LQG.lcm  
Batch Filename :  
Vial # : 1-1  
Injection Volume : 15 uL  
Date Acquired : 5/22/2019 8:25:34 PM  
Date Processed : 5/22/2019 8:38:53 PM

Sample Type : Unknown  
Acquired by : System Administrator  
Processed by : System Administrator

### <Chromatogram>

mV

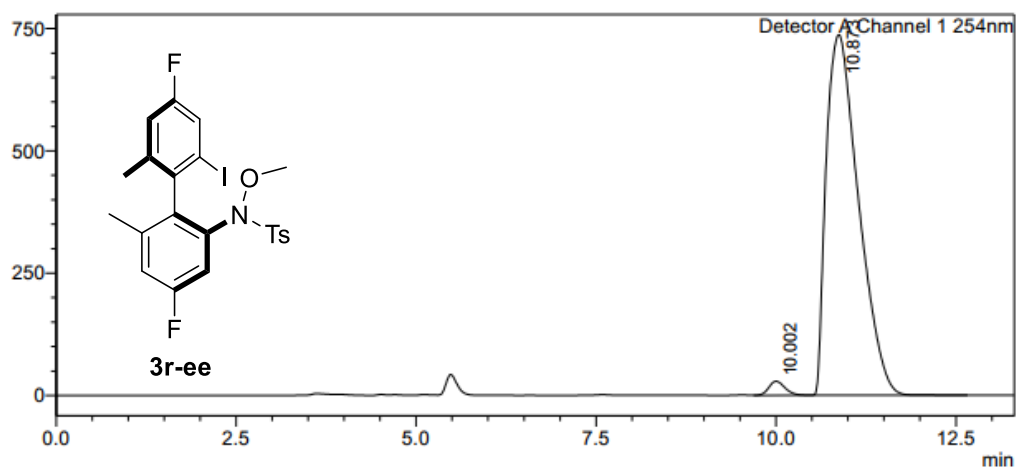

### <Peak Table>

Detector A Channel 1 254nm

| Peak# | Ret. Time | Area     | Height | Conc.  | Unit | Mark | Name |
|-------|-----------|----------|--------|--------|------|------|------|
| 1     | 10.002    | 454248   | 28782  | 1.936  |      |      |      |
| 2     | 10.873    | 23012579 | 737071 | 98.064 |      | V    |      |
| Total |           | 23466827 | 765852 |        |      |      |      |



Data File F:\DATA\LQG\DATA\lqg-2-42-2(AD,10%,1.0,rac).D  
Sample Name: lqg-2-42-2(AD,10%,1.0,rac)

=====

Acq. Operator : SYSTEM

Location : 1

Injection Date : 04/04/2019 16:36:47

Acq. Method : LQG.M

Analysis Method : C:\Chem32\1\Methods\DEF\_LC.M

Last changed : 13/02/2014 23:27:44 by SYSTEM

Additional Info : Peak(s) manually integrated

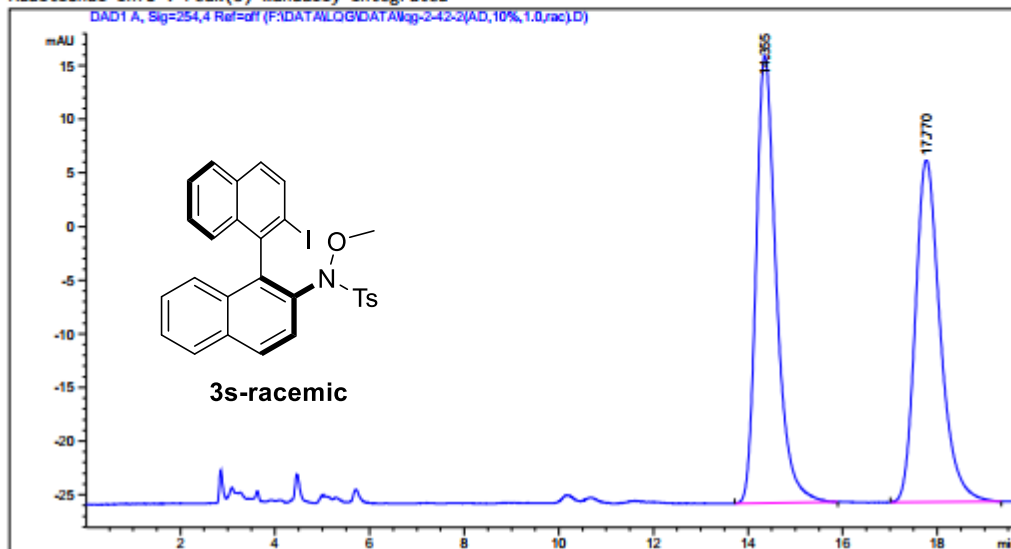

=====

Area Percent Report

=====

Sorted By : Signal  
Multiplier : 1.0000  
Dilution : 1.0000  
Use Multiplier & Dilution Factor with ISTDs

Signal 1: DAD1 A, Sig=254,4 Ref=off

| Peak # | RetTime [min] | Type | Width [min] | Area [mAU*s] | Height [mAU] | Area %  |
|--------|---------------|------|-------------|--------------|--------------|---------|
| 1      | 14.355        | BB   | 0.4499      | 1237.13672   | 41.72853     | 51.5447 |
| 2      | 17.770        | BB   | 0.5510      | 1162.98914   | 31.92636     | 48.4553 |

Totals : 2400.12585 73.65489

=====

\*\*\* End of Report \*\*\*

Data File F:\DATA\LQG\DATA\lqg-2-42-1(AD,10%,1.0,ee).D  
 Sample Name: lqg-2-42-1(AD,10%,1.0,ee)

```

=====
Acq. Operator   : SYSTEM
Sample Operator : SYSTEM
Acq. Instrument : LC1260
Injection Date  : 04/04/2019 16:58:22
Location       : 1
Inj Volume     : No inj

Acq. Method    : F:\METHOD\LQG.M\LQG.M
Last changed   : 04/04/2019 16:10:35 by SYSTEM
                (modified after loading)
Analysis Method : C:\Chem32\1\Methods\DEF_LC.M
Last changed   : 13/02/2014 23:27:44 by SYSTEM
Additional Info : Peak(s) manually integrated
  
```

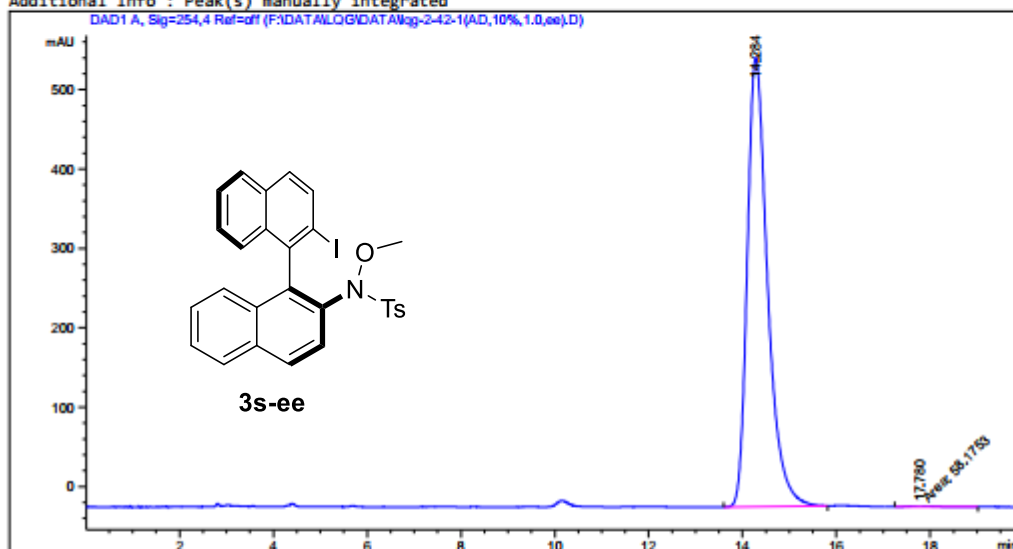

# Area Percent Report

```

=====
Sorted By      : Signal
Multiplier     : 1.0000
Dilution       : 1.0000
Use Multiplier & Dilution Factor with ISTDs
  
```

Signal 1: DAD1 A, Sig=254,4 Ref=off

| Peak # | RetTime [min] | Type | Width [min] | Area [mAU*s] | Height [mAU] | Area %  |
|--------|---------------|------|-------------|--------------|--------------|---------|
| 1      | 14.284        | BB   | 0.4577      | 1.69493e4    | 565.48126    | 99.6579 |
| 2      | 17.780        | MM   | 0.6182      | 58.17533     | 1.56849      | 0.3421  |

Totals : 1.70075e4 567.04976

Data File F:\DATA\LQG\DATA\LQG-2-49(AD,5%,1.0,raec).D  
 Sample Name: LQG-2-49(AD,5%,1.0,raec)

```
=====
Acq. Operator   : SYSTEM
Sample Operator : SYSTEM
Acq. Instrument : LC1260
Injection Date  : 07/04/2019 18:44:01
Location       : 1
Inj Volume     : No inj

Acq. Method    : F:\METHOD\LQG.M\LQG.M
Last changed   : 07/04/2019 18:14:18 by SYSTEM
                (modified after loading)
Analysis Method : C:\Chem32\1\Methods\DEF_LC.M
Last changed   : 13/02/2014 23:27:44 by SYSTEM
Additional Info : Peak(s) manually integrated
=====
```

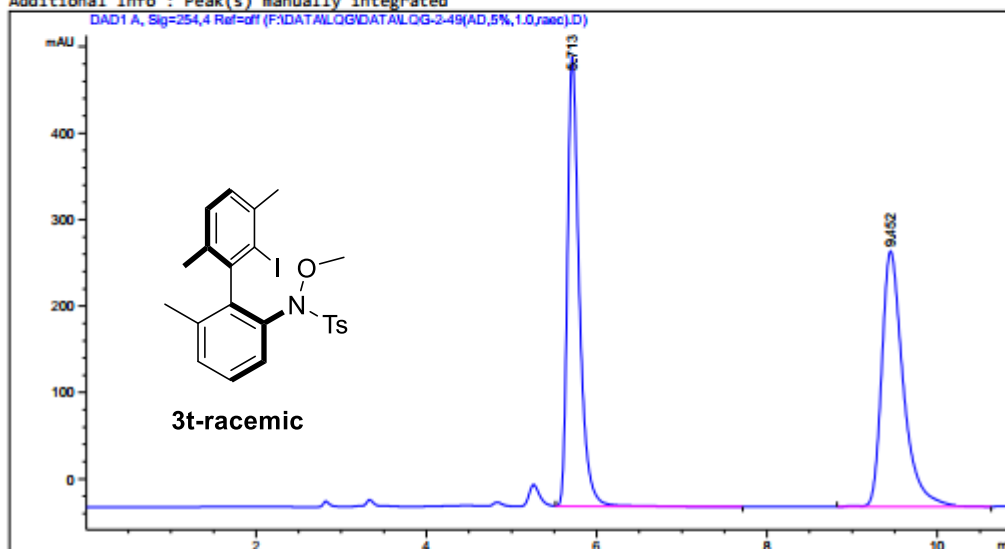

=====  
 Area Percent Report  
 =====

```
Sorted By      : Signal
Multiplier     : 1.0000
Dilution       : 1.0000
Use Multiplier & Dilution Factor with ISTDs
```

Signal 1: DAD1 A, Sig=254,4 Ref=off

| Peak # | RetTime [min] | Type | Width [min] | Area [mAU*s] | Height [mAU] | Area %  |
|--------|---------------|------|-------------|--------------|--------------|---------|
| 1      | 5.713         | VB   | 0.1456      | 5062.84375   | 519.84351    | 49.3886 |
| 2      | 9.452         | VB R | 0.2624      | 5188.19824   | 295.46429    | 50.6114 |

Totals : 1.02510e4 815.30780

Data File F:\DATA\LQG\DATA\lqg-2-49(AD,5%,1.0,EE).D  
Sample Name: lqg-2-49(AD,5%,1.0,EE)

=====

Acq. Operator : SYSTEM

Location : 1

Injection Date : 07/04/2019 19:05:56

Acq. Method : LQG.M

Analysis Method : C:\Chem32\1\Methods\DEF\_LC.M

Last changed : 13/02/2014 23:27:44 by SYSTEM

Additional Info : Peak(s) manually integrated

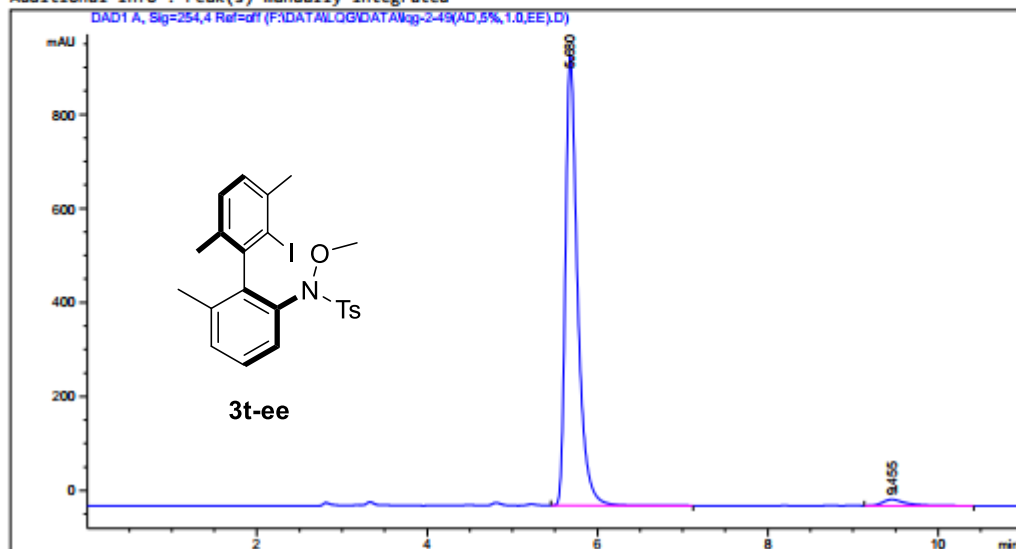

=====

Area Percent Report

=====

Sorted By : Signal  
Multiplier : 1.0000  
Dilution : 1.0000  
Use Multiplier & Dilution Factor with ISTDs

Signal 1: DAD1 A, Sig=254,4 Ref=off

| Peak # | RetTime [min] | Type | Width [min] | Area [mAU*s] | Height [mAU] | Area %  |
|--------|---------------|------|-------------|--------------|--------------|---------|
| 1      | 5.680         | VB   | 0.1497      | 9482.16504   | 955.73468    | 97.4887 |
| 2      | 9.455         | BB   | 0.2706      | 244.25656    | 13.27935     | 2.5113  |

Totals : 9726.42160 969.01403

=====

\*\*\* End of Report \*\*\*

### <Sample Information>

Sample Name : LQG-2-140(ID,5%,1.0,RAC)  
Sample ID :  
Data Filename : LQG-2-140(ID,5%,1.0,RAC).lcd  
Method Filename : LQG.lcm  
Batch Filename :  
Vial # : 1-1  
Injection Volume : 15 uL  
Date Acquired : 5/30/2019 7:45:39 PM  
Date Processed : 5/30/2019 8:13:02 PM

Sample Type : Unknown  
Acquired by : System Administrator  
Processed by : System Administrator

### <Chromatogram>

mV

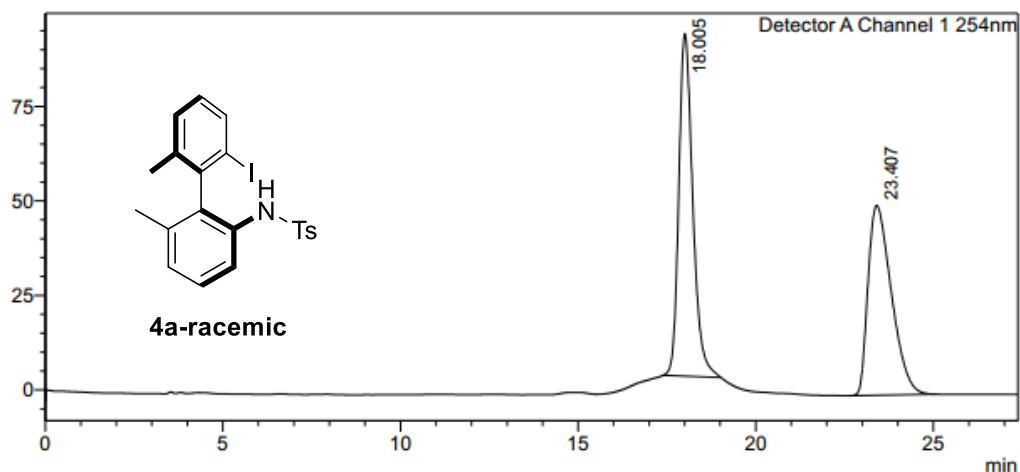

### <Peak Table>

Detector A Channel 1 254nm

| Peak# | Ret. Time | Area    | Height | Conc.  | Unit | Mark | Name |
|-------|-----------|---------|--------|--------|------|------|------|
| 1     | 18.005    | 2477397 | 90555  | 51.904 |      | M    |      |
| 2     | 23.407    | 2295613 | 50168  | 48.096 |      |      |      |
| Total |           | 4773009 | 140723 |        |      |      |      |

### <Sample Information>

Sample Name : LQG-2-183(ID,5%,1.0,ee)  
Sample ID :  
Data Filename : LQG-2-183(ID,5%,1.0,ee).lcd  
Method Filename : LQG.lcm  
Batch Filename :  
Vial # : 1-1  
Injection Volume : 15 uL  
Date Acquired : 5/30/2019 8:19:43 PM  
Date Processed : 5/30/2019 8:46:10 PM

Sample Type : Unknown  
Acquired by : System Administrator  
Processed by : System Administrator

### <Chromatogram>

mV

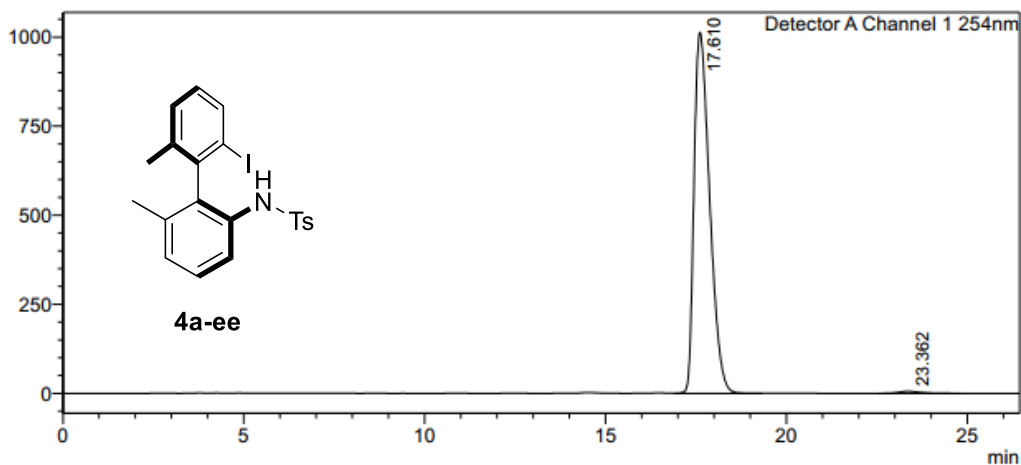

### <Peak Table>

Detector A Channel 1 254nm

| Peak# | Ret. Time | Area     | Height  | Conc.  | Unit | Mark | Name |
|-------|-----------|----------|---------|--------|------|------|------|
| 1     | 17.610    | 30483390 | 1012893 | 99.267 |      |      |      |
| 2     | 23.362    | 225103   | 5555    | 0.733  |      | S    |      |
| Total |           | 30708493 | 1018448 |        |      |      |      |

Data File F:\DATA\LQG\DATA\lqg-3-21(00,99%,1.0,rac)-2.D  
Sample Name: lqg-3-21(00,99%,1.0,rac)-2

=====

|                 |                                 |                     |
|-----------------|---------------------------------|---------------------|
| Acq. Operator   | : SYSTEM                        |                     |
| Sample Operator | : SYSTEM                        |                     |
| Acq. Instrument | : LC1260                        | Location : 1        |
| Injection Date  | : 27/06/2019 03:07:54           |                     |
|                 |                                 | Inj Volume : No inj |
| Acq. Method     | : F:\METHOD\LQG.M\LQG.M         |                     |
| Last changed    | : 27/06/2019 02:45:02 by SYSTEM |                     |
|                 | (modified after loading)        |                     |
| Analysis Method | : C:\Chem32\1\Methods\DEF_LC.M  |                     |
| Last changed    | : 13/02/2014 23:27:44 by SYSTEM |                     |
| Additional Info | : Peak(s) manually integrated   |                     |

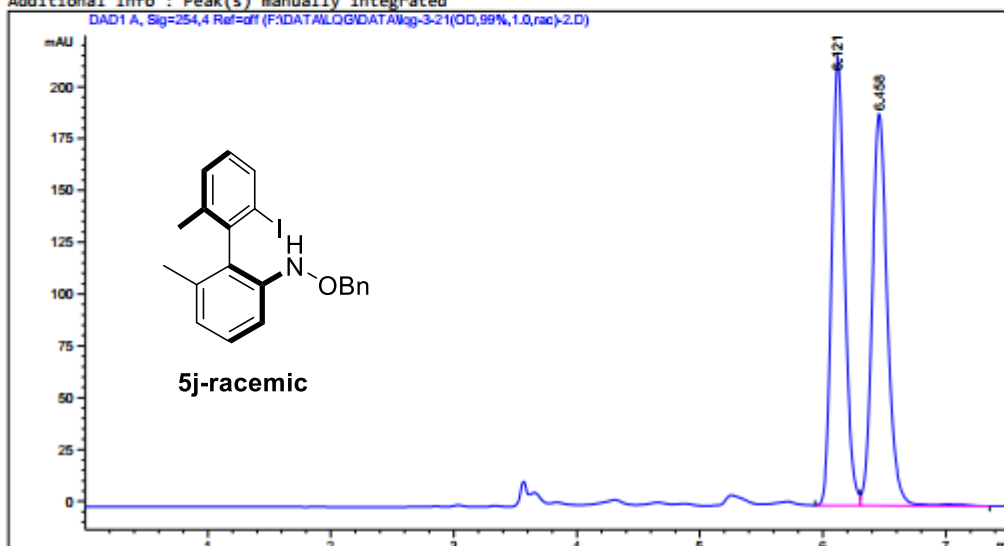

=====  
Area Percent Report  
=====

Sorted By : Signal  
Multiplier : 1.0000  
Dilution : 1.0000  
Use Multiplier & Dilution Factor with ISTDs

Signal 1: DAD1 A, Sig=254,4 Ref=off

| Peak # | RetTime [min] | Type | Width [min] | Area [mAU*s] | Height [mAU] | Area %  |
|--------|---------------|------|-------------|--------------|--------------|---------|
| 1      | 6.121         | BV   | 0.1135      | 1583.65442   | 216.01329    | 49.2245 |
| 2      | 6.458         | VV R | 0.1312      | 1633.55298   | 189.10907    | 50.7755 |

Totals : 3217.20740 405.12236

Data File F:\DATA\LQG\DATA\lqg-3-22(OD,99%,1.0,EE)-2.D  
Sample Name: lqg-3-22(OD,99%,1.0,EE)-2

```
=====
Acq. Operator   : SYSTEM
Sample Operator : SYSTEM
Acq. Instrument : LC1260
Injection Date  : 27/06/2019 03:26:02
Location       : 1
Inj Volume     : No inj

Acq. Method    : F:\METHOD\LQG.M\LQG.M
Last changed   : 27/06/2019 02:45:02 by SYSTEM
                (modified after loading)
Analysis Method : C:\Chem32\1\Methods\DEF_LC.M
Last changed   : 13/02/2014 23:27:44 by SYSTEM
Additional Info : Peak(s) manually integrated
=====
```

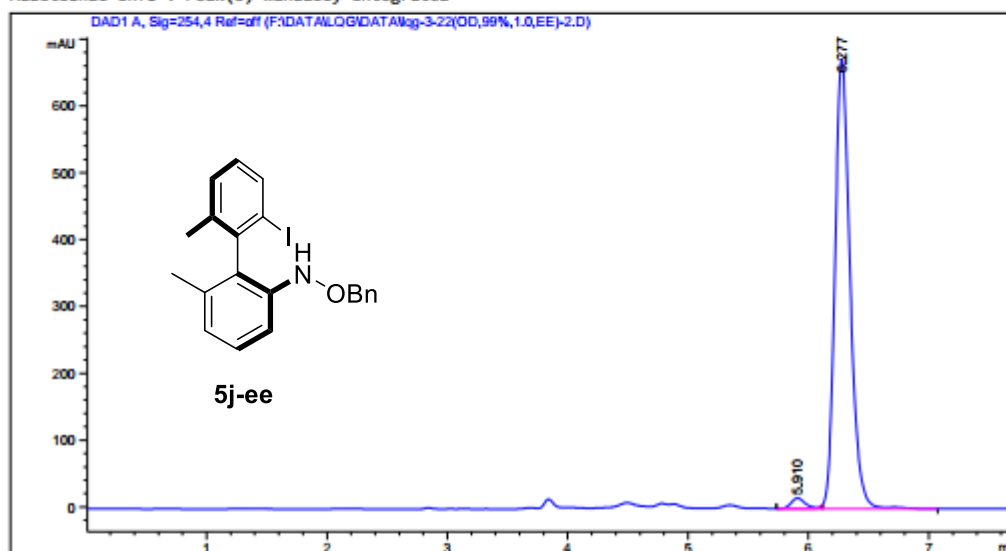

# Area Percent Report

```
=====
Sorted By      : Signal
Multiplier     : 1.0000
Dilution       : 1.0000
Use Multiplier & Dilution Factor with ISTDs
=====
```

Signal 1: DAD1 A, Sig=254,4 Ref=off

| Peak # | RetTime [min] | Type | Width [min] | Area [mAU*s] | Height [mAU] | Area %  |
|--------|---------------|------|-------------|--------------|--------------|---------|
| 1      | 5.910         | BV E | 0.1231      | 127.86519    | 15.68876     | 2.1217  |
| 2      | 6.277         | VV R | 0.1338      | 5898.67578   | 672.73169    | 97.8783 |

Totals : 6026.54097 688.42045



Data File F:\DATA\LQG\DATA\lqg-3-18-1(AD,1%,1.0,RAC).D  
Sample Name: lqg-3-18-1(AD,1%,1.0,RAC)

=====

|                 |                                 |                     |
|-----------------|---------------------------------|---------------------|
| Acq. Operator   | : SYSTEM                        |                     |
| Sample Operator | : SYSTEM                        |                     |
| Acq. Instrument | : LC1260                        | Location : 1        |
| Injection Date  | : 27/06/2019 04:12:45           |                     |
|                 |                                 | Inj Volume : No inj |
| Acq. Method     | : F:\METHOD\LQG.M\LQG.M         |                     |
| Last changed    | : 27/06/2019 04:02:06 by SYSTEM |                     |
|                 | (modified after loading)        |                     |
| Analysis Method | : C:\Chem32\1\Methods\DEF_LC.M  |                     |
| Last changed    | : 13/02/2014 23:27:44 by SYSTEM |                     |
| Additional Info | : Peak(s) manually integrated   |                     |

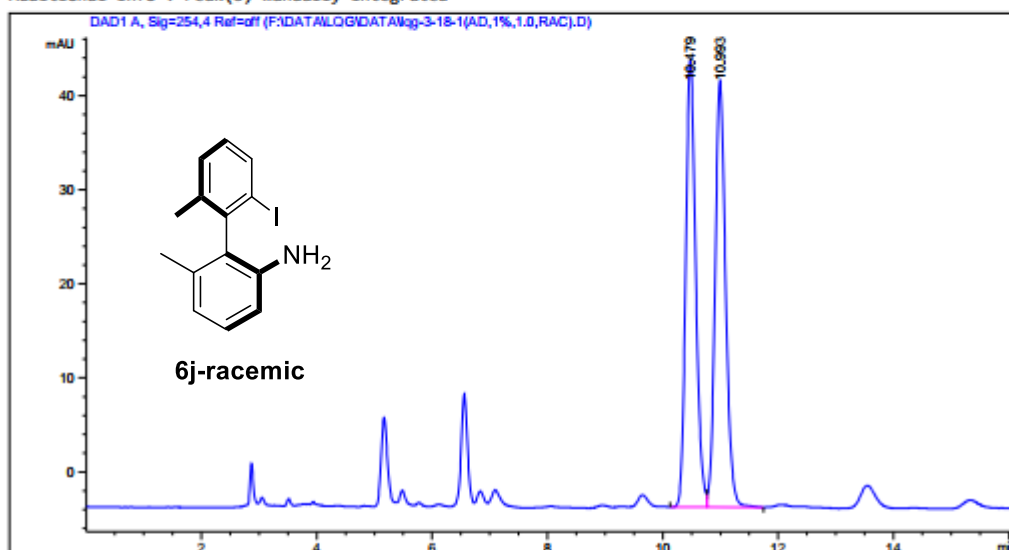

=====  
Area Percent Report  
=====

Sorted By : Signal  
Multiplier : 1.0000  
Dilution : 1.0000  
Use Multiplier & Dilution Factor with ISTDs

Signal 1: DAD1 A, Sig=254,4 Ref=off

| Peak # | RetTime [min] | Type | Width [min] | Area [mAU*s] | Height [mAU] | Area %  |
|--------|---------------|------|-------------|--------------|--------------|---------|
| 1      | 10.479        | BV   | 0.1840      | 570.94690    | 47.57078     | 49.8269 |
| 2      | 10.993        | VB   | 0.1942      | 574.91272    | 45.25718     | 50.1731 |

Totals : 1145.85962 92.82796

Sample Name: lqg-3-18-1(AD,1%,1.0,EE)

=====

Acq. Operator : SYSTEM

Location : 1

Injection Date : 27/06/2019 04:41:46

Acq. Method : LQG.M

Analysis Method : C:\Chem32\1\Methods\DEF\_LC.M

Last changed : 13/02/2014 23:27:44 by SYSTEM

Additional Info : Peak(s) manually integrated

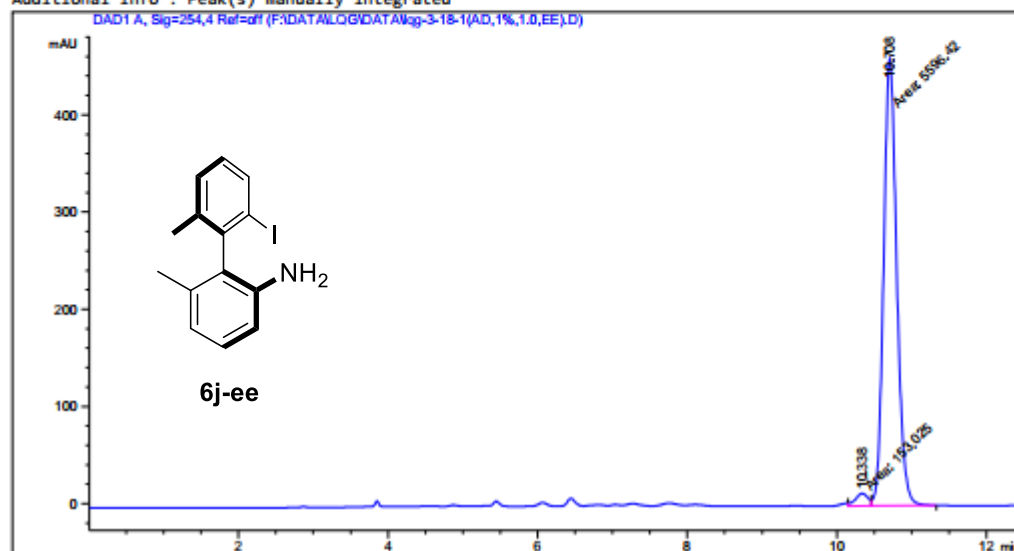

## =====

## Area Percent Report

Sorted By : Signal  
Multiplier : 1.0000  
Dilution : 1.0000  
Use Multiplier & Dilution Factor with ISTDs

Signal 1: DAD1 A, Sig=254,4 Ref=off

| Peak # | RetTime [min] | Type | Width [min] | Area [mAU*s] | Height [mAU] | Area %  |
|--------|---------------|------|-------------|--------------|--------------|---------|
| 1      | 10.338        | FM   | 0.1993      | 153.02519    | 12.80002     | 2.6616  |
| 2      | 10.708        | FM   | 0.2026      | 5596.42139   | 460.40860    | 97.3384 |

Totals : 5749.44658 473.20862

=====

\*\*\* End of Report \*\*\*

Data File F:\DATA\LQG\DATA\lqg-2-187(AD,2%,1.0,rac).D  
Sample Name: lqg-2-187(AD,2%,1.0,rac)

=====

Acq. Operator : SYSTEM  
Sample Operator : SYSTEM  
Acq. Instrument : LC1260 Location : 1  
Injection Date : 01/06/2019 17:17:23 Inj Volume : No inj

Acq. Method : F:\METHOD\LQG.M\LQG.M  
Last changed : 01/06/2019 17:14:08 by SYSTEM  
(modified after loading)

Analysis Method : C:\Chem32\1\Methods\DEF\_LC.M  
Last changed : 13/02/2014 23:27:44 by SYSTEM

Additional Info : Peak(s) manually integrated

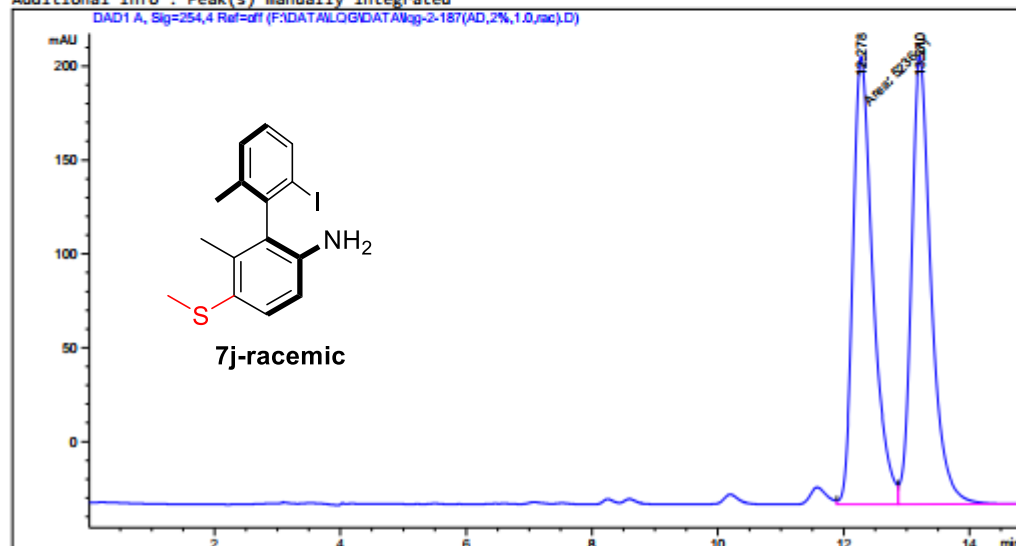

Area Percent Report

Sorted By : Signal  
Multiplier : 1.0000  
Dilution : 1.0000  
Use Multiplier & Dilution Factor with ISTDs

Signal 1: DAD1 A, Sig=254,4 Ref=off

| Peak # | RetTime [min] | Type | Width [min] | Area [mAU*s] | Height [mAU] | Area %  |
|--------|---------------|------|-------------|--------------|--------------|---------|
| 1      | 12.278        | FM   | 0.3658      | 5236.31006   | 238.59991    | 50.1401 |
| 2      | 13.210        | VBA  | 0.3263      | 5207.04443   | 238.92494    | 49.8599 |

Totals : 1.04434e4 477.52486

Data File F:\DATA\LQG\DATA\lqg-3-18-2(AD,2%,1.0,EE)-2.D  
Sample Name: lqg-3-18-2(AD,2%,1.0,EE)-2

=====

Acq. Operator : SYSTEM

Location : 1

Injection Date : 27/06/2019 05:16:30

Acq. Method : LQG.M

Analysis Method : C:\Chem32\1\Methods\DEF\_LC.M

Last changed : 13/02/2014 23:27:44 by SYSTEM

Additional Info : Peak(s) manually integrated

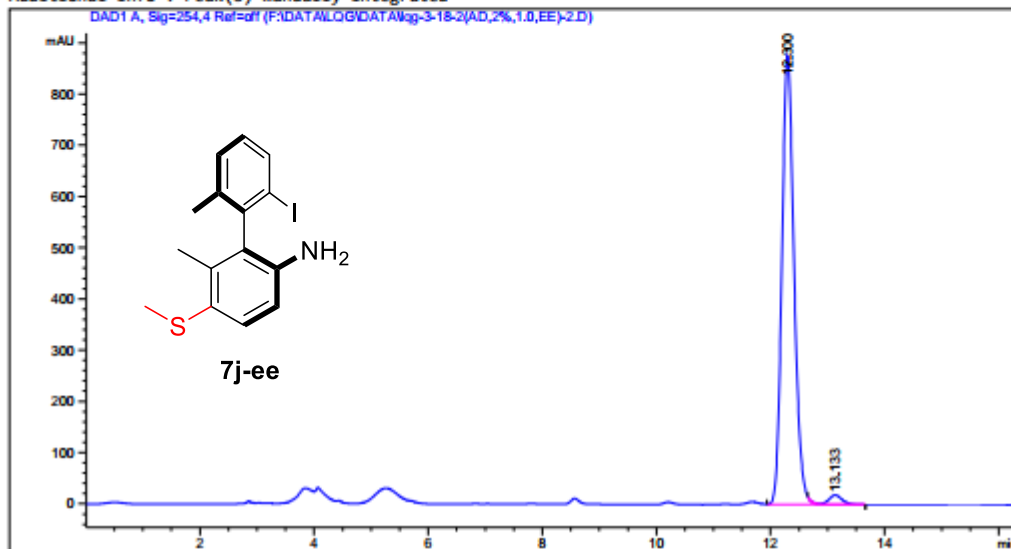

=====

Area Percent Report

=====

Sorted By : Signal  
Multiplier : 1.0000  
Dilution : 1.0000  
Use Multiplier & Dilution Factor with ISTDs

Signal 1: DAD1 A, Sig=254,4 Ref=off

| Peak # | RetTime [min] | Type | Width [min] | Area [mAU*s] | Height [mAU] | Area %  |
|--------|---------------|------|-------------|--------------|--------------|---------|
| 1      | 12.300        | VV R | 0.2261      | 1.29332e4    | 876.59192    | 97.7341 |
| 2      | 13.133        | VB E | 0.2483      | 299.85281    | 18.38339     | 2.2659  |

Totals : 1.32330e4 894.97531

=====

\*\*\* End of Report \*\*\*
